# Supplementary material for: Enhancer Remodeling and MicroRNA Alterations Are Associated with Acquired Resistance to ALK Inhibitors
Source: Oxford University Press journal article supplement (doi:10.1158/0008-5472.can-17-3146), 2018-04-18
Supplement: 00085472can173146-sup-190762_2_supp_4683972_p6zyg6.xlsx [file 00085472can173146-sup-190762_2_supp_4683972_p6zyg6.xlsx]

## Sheet: Sheet1
Table S3. Gene expression levels in H3122, LR, and panobinostat treated LR cells and the promoter or enhancer H3K27 ac gain or loss category of each gene.
Tracking_id	Gene name	Locus	H3122_1	H3122_2	LR_1	LR_2	Pano_1	Pano_2	FC_log2ratio.H3122_vs_LR	LR promoter gain	LR promoter loss	LR enhancer gain	LR enhancer loss	Pano promoter gain	Pano promoter loss	Pano enhancer gain	Pano enhancer loss
NR_003701	SNORD58C	chr18:47007547-47018935	0	0	8.8325	8.86373	0	0	8.84811
NM_001353	AKR1C1	chr10:5005453-5020158	2.07843	2.12361	9.27311	9.13588	8.94923	9.13484	7.10348	O		O			O		O
NR_036158	MIR3190	chr19:47724078-47736023	0	0	0	12.2264	0	0	6.11318
NM_004318	ASPH	chr8:62200524-62627199	0.0262757	0.0627749	5.65473	6.07516	6.09701	4.63474	5.82042			O		O		O	O
NR_036125	MIR1260B	chr11:95711439-96076344	9.53086	0	9.198	11.2122	0	9.58728	5.43968			O					O
NR_031576	MIR762	chr16:30899115-30905399	0	0	10.8592	0	0	0	5.42958
NM_005711	EDIL3	chr5:83238125-83680611	1.85793	1.94658	7.26396	7.29826	7.40898	7.46329	5.37885			O	O	O			O
NR_002967	SNORA31	chr13:45911303-45915297	0	0	5.52446	5.09998	0	0	5.31222								O
NM_020299	AKR1B10	chr7:134212343-134226166	1.55065	1.58645	6.81893	6.91767	6.45069	6.5173	5.29975	O					O		O
NR_030345	MIR614	chr12:13068762-13068852	0	0	0	10.4451	10.7666	0	5.22253	O
NM_205845	AKR1C2	chr10:5029967-5060225	2.75096	2.76251	7.74466	7.75415	7.5409	7.60209	4.99267			O					O
NM_001146108	PTGR1	chr9:114287446-114362135	4.09021	4.3822	9.00455	9.17014	8.83319	9.04947	4.85114	O		O			O		O
NM_004615	TSPAN7	chrX:38420730-38548172	0.992813	1.00651	5.7831	5.69564	5.47114	5.47714	4.73971			O					O
NM_001025195	CES1	chr16:55836763-55867075	0.356744	0.199297	4.87598	4.8522	4.98399	4.92521	4.58607			O					O
NR_003030	SNORD12	chr20:47862438-47905795	0	0	0	9.00258	0	0	4.50129				O		O		O
NR_030290	MIR564	chr3:44903379-44907154	0	0	8.96548	0	0	0	4.48274							O
NM_000820	GAS6	chr13:114518582-114567046	0.943646	1.11994	5.35811	5.54732	5.68502	5.68232	4.42092					O		O
NM_003051	SLC16A1	chr1:113454469-113498975	0.301164	0.292797	4.67099	4.66836	5.49823	5.51432	4.3727	O				O
NM_003186	TAGLN	chr11:117049938-117075508	2.35438	2.1459	6.39014	6.53041	5.32223	5.3946	4.21013
NM_001753	CAV1	chr7:116164838-116201239	2.79621	2.78348	7.04203	6.95003	5.24948	5.09541	4.20618			O			O		O
NR_003067	SNORD88A	chr19:51300960-51307974	0	0	8.13722	0	0	0	4.06861
NM_001699	AXL	chr19:41725107-41767671	0.349813	0.300913	4.24336	4.36364	4.38035	4.26088	3.97814	O
NM_007173	PRSS23	chr11:86511490-86522273	3.05449	3.1105	7.0534	7.0413	7.26458	7.32709	3.96485	O		O			O		O
NR_031650	MIR1248	chr3:186501360-186524484	0	0	7.86211	0	0	0	3.93106
NM_201442	C1S	chr12:7167979-7178335	0.000103684	0.0768001	3.94524	3.90879	2.93562	2.94407	3.88857	O							O
NR_000024	SNORD46	chr1:45241245-45244412	0	0	0	7.76387	0	7.07506	3.88193
NR_003684	SNORD119	chr20:2442280-2451499	0	0	7.74325	0	0	0	3.87163
NR_002979	SNORA49	chr12:132434464-132565011	0	3.34422	4.22285	6.75856	4.83842	3.68088	3.81859					O		O
NR_003029	SNORD9	chr14:21853352-21905457	0	0	0	7.61506	0	0	3.80753
NM_002444	MSN	chrX:64887510-64961793	2.79703	2.67561	6.55511	6.51903	6.38173	6.36509	3.80075	O		O					O
NR_002958	SNORA17	chr9:139607023-139622636	2.20428	0	5.09355	4.70282	0	0	3.79605
NR_039985	FLJ22447	chr14:62037257-62121431	0.958958	0.877245	4.69371	4.70526	3.20164	3.24885	3.78139
NM_001632	ALPP	chr2:233243347-233247599	0.0516246	0	3.76902	3.83626	3.72173	3.85022	3.77683				O
NM_004342	CALD1	chr7:134464163-134655480	0	0	3.7758	3.76775	3.90275	3.98748	3.77177	O	O	O	O				O
NM_001630	ANXA8L2	chr10:47746919-47763040	0.636446	0.674718	4.39103	4.37611	3.53674	3.39902	3.72799
NM_001104544	FAM70A	chrX:119392504-119445391	0.260969	0.128955	3.92912	3.87913	4.2637	4.25519	3.70916
NM_000700	ANXA1	chr9:75766780-75785307	5.30652	5.44542	9.01107	9.04674	9.16239	9.31137	3.65294	O		O	O		O	O	O
NM_000600	IL6	chr7:22766765-22771621	2.63255	2.61888	6.19884	6.22498	4.69086	5.03143	3.58619						O		O
NM_002150	HPD	chr12:122277432-122326517	0.0597104	0.0573814	3.5692	3.70344	4.17031	4.05305	3.57778			O		O		O
NM_002083	GPX2	chr14:65381078-65569227	1.58705	1.58321	5.13537	5.17998	4.81001	4.8	3.57255	O					O
NM_012232	PTRF	chr17:40554466-40575338	1.95265	1.82665	5.36694	5.49498	6.39457	6.33759	3.54131					O		O
NR_030395	MIR658	chr22:38226861-38240378	0	0	0	7.03231	6.9164	0	3.51616
NM_001039538	MAP2	chr2:210288770-210598834	0.182219	0.2968	3.76598	3.72682	4.25167	4.32043	3.50689			O					O
NM_002298	LCP1	chr13:46700057-46756459	3.31142	3.33544	6.78876	6.84093	6.64811	6.79009	3.49142	O		O			O		O
NR_024089	LINC00162	chr21:46419126-46424642	0	0	3.4296	3.55158	3.72027	3.72878	3.49059	O					O
NM_001199208	CYP4F3	chr19:15751706-15771570	0.429604	0.426994	3.95314	3.84641	4.20178	4.14356	3.47148			O					O
NM_005098	MSC	chr8:72753776-72987819	0.258832	0.246321	3.64118	3.74319	3.26203	3.31361	3.43961	O		O					O
NR_003068	SNORD88B	chr19:51300960-51307974	0	6.75934	6.73006	6.83232	6.71809	7.1388	3.40152
NM_002193	INHBB	chr2:121103718-121109383	2.9727	3.02145	6.33035	6.4533	5.86149	5.71564	3.39475	O		O				O
NR_003070	SNORD89	chr2:101889397-101889511	4.76998	0	5.95591	5.45377	4.43159	0	3.31985							O
NM_001040058	SPP1	chr4:88896801-88904563	0.133232	0.110119	3.4351	3.41464	3.67983	3.70714	3.3032	O					O
NR_003277	LOC728643	chr10:47096453-47151400	1.85892	2.32932	5.36294	5.32103	5.2509	5.22945	3.24786
NM_001124	ADM	chr11:10326641-10328923	2.91756	2.83803	6.0743	6.13774	6.77947	6.82776	3.22822
NM_001128932	CYP4F11	chr19:16023179-16045676	2.43062e-06	0.0358277	3.24051	3.24005	4.07756	4.12767	3.22236	O				O
NM_001256105	WNT5A	chr3:55499742-55521670	0.87177	0.79004	3.97564	4.10001	2.98717	2.74489	3.20692			O	O				O
NM_001733	C1R	chr12:7187514-7245043	1.51639	1.4708	4.64033	4.73678	3.71464	3.72156	3.19496
NM_025208	PDGFD	chr11:103777913-104035027	0.845766	0.477613	3.96594	3.73014	4.02199	4.07205	3.18635			O		O		O	O
NR_002992	SNORA7B	chr3:129101676-129118282	0	0	2.70096	3.66262	2.76746	3.08233	3.18179
NM_147184	TP53I3	chr2:24300302-24308085	3.59107	3.63844	6.68633	6.87403	6.172	6.33015	3.16543			O				O
NM_006097	MYL9	chr20:35169886-35178226	2.04869	1.69909	4.98268	5.09362	4.59493	4.73073	3.16426							O
NM_133459	CCBE1	chr18:57098170-57364644	0.505426	0.496249	3.63377	3.66547	3.9304	3.99372	3.14878	O		O		O		O	O
NM_001037330	TRIM16L	chr17:18625401-18639431	2.52981	2.57798	5.67292	5.70739	5.52813	5.51795	3.13626						O
NR_002604	SNORD10	chr17:7465308-7482324	0	3.62188	3.04456	6.8257	3.65636	3.97479	3.12419
NR_002585	SNORA52	chr11:809935-812876	3.45864	0	3.24857	6.44313	5.51695	0	3.11653
NM_002061	GCLM	chr1:94352589-94375012	4.3062	4.3251	7.40426	7.42594	6.93068	6.89986	3.09945	O		O		O	O		O
NM_002840	PTPRF	chr1:43996546-44089343	1.11706	0.952768	4.16254	4.08977	4.45454	4.39724	3.09124			O				O
NM_032711	MAFG	chr17:79876144-79885587	1.32018	2.52351	4.98639	4.99973	4.60689	4.4507	3.07122	O
NM_000227	LAMA3	chr18:21269561-21535029	3.13397	3.26713	6.26403	6.26876	5.84801	5.92588	3.06584			O		O	O	O	O
NM_005554	KRT6A	chr12:52880957-52887181	2.43259	2.49436	5.54155	5.49944	4.32458	4.16608	3.05702						O		O
NM_025130	HKDC1	chr10:70980058-71027315	0.0767353	0.047197	3.08282	3.11431	3.51095	3.4352	3.0366								O
NR_002569	SCARNA9	chr11:93394815-93463522	1.67202	1.5139	4.82686	4.38184	4.40261	4.354	3.01139							O
NM_006760	UPK2	chr11:118827007-118829269	0.203214	0.323156	3.26013	3.28603	2.93192	2.67152	3.00989							O
NM_001166109	PALLD	chr4:169418216-169849608	2.42607	2.22699	5.35355	5.27636	5.56288	5.64219	2.98842	O	O	O	O	O	O	O	O
NR_002910	SNORA71B	chr20:37049238-37064018	0	0	2.93252	3.0016	0	0	2.96706							O
NM_001145211	SLCO2B1	chr11:74862031-74917445	0.0915896	0.104828	2.99848	3.12929	3.36088	3.39355	2.96568							O
NM_177551	HCAR2	chr12:123185839-123187904	0.24827	0.295048	3.20683	3.23401	2.9897	2.8399	2.94876	O		O			O		O
NM_001127651	NCF2	chr1:183524696-183560056	1.25238	1.524	4.34926	4.2991	4.7131	4.66064	2.93599	O		O			O	O	O
NM_182487	OLFML2A	chr9:127539436-127577159	1.21833	1.24657	4.11887	4.18631	4.49019	4.4577	2.92014			O				O
NM_058229	FBXO32	chr8:124510126-124553493	3.02836	3.08279	5.94219	5.94756	5.47711	5.46324	2.8893			O					O
NM_001081640	PRKDC	chr8:48685668-48872743	1.35531	1.88635	4.50932	4.43437	4.20356	4.38232	2.85101			O					O
NM_020733	HEG1	chr3:124684553-124774802	1.7643	1.9182	4.69751	4.65767	5.60727	5.60356	2.83634	O				O
NM_014405	CACNG4	chr17:64960979-65029518	1.11046	1.04593	3.85365	3.96808	4.03711	4.03325	2.83267					O		O
NR_002963	SNORA24	chr4:119199916-119200978	3.62265	0	3.3689	5.89436	4.89816	4.68077	2.8203			O					O
NR_033752	LOC344887	chr3:185677757-185698665	0.263051	0.396264	3.16025	3.08381	3.05071	2.84848	2.79237			O			O
NM_001146157	FAM25A	chr10:88780045-88784487	0	0.168435	2.90746	2.82979	3.28227	3.43539	2.78441							O
NM_198541	IGFL1	chr19:46720994-46846690	3.95609	3.93312	6.63075	6.804	8.03986	8.15025	2.77277	O
NM_001849	COL6A2	chr21:47518032-47552763	2.50074	2.39622	5.24502	5.19065	5.50525	5.17125	2.76935					O		O	O
NM_001104548	MIR205HG	chr1:209602167-209605892	0.363377	0.305763	3.09997	3.07542	3.18244	3.13539	2.75313			O	O			O	O
NM_000691	ALDH3A1	chr17:19641297-19651746	4.0262	3.90081	6.67914	6.71865	5.88734	5.82739	2.73539							O	O
NR_037500	MIR3936	chr5:131630144-131731306	0	0	5.46511	0	7.01373	0	2.73256			O	O	O			O
NR_049803	MIR5006	chr13:42140960-42535221	0	0	5.45977	0	0	0	2.72988			O	O				O
NM_001760	CCND3	chr6:41902670-42016610	2.96331	3.07167	5.66795	5.81067	5.40187	5.2522	2.72182			O		O		O	O
NM_182981	OSGIN1	chr16:83986826-83999937	2.10192	2.07505	4.80308	4.80885	5.25407	5.29829	2.71748	O	O					O
NM_001195483	SLC12A8	chr3:124801479-124931609	0.00348361	0.000695083	2.54344	2.89073	3.66798	3.9966	2.715		O	O	O			O	O
NM_003739	AKR1C3	chr10:5090957-5149878	4.19932	4.23989	6.90218	6.94126	7.17515	7.35811	2.70212			O			O		O
NR_002957	SNORA15	chr7:56119377-56131682	0	4.44225	4.39005	5.37373	4.96987	0	2.66076
NM_003512	HIST1H2AC	chr6:26124372-26124918	3.68073	3.49667	6.14026	6.33814	6.29842	6.42906	2.6505
NM_002053	GBP1	chr1:89517986-89531043	1.64838	1.58207	4.22682	4.29009	3.40338	3.54128	2.64323	O					O
NM_001242858	PRKACB	chr1:84543744-84704181	0.00136966	0.126638	2.62852	2.78177	2.3681	3.22919	2.64114	O		O	O	O	O		O
NR_000025	SNORD15B	chr11:75110534-75133345	4.46197	4.01282	5.28024	8.47431	5.57211	6.02235	2.63988
NM_001130145	YAP1	chr11:101981191-102104154	2.84233	2.57331	5.23128	5.45701	4.91776	4.50099	2.63632			O		O	O		O
NM_003979	GPRC5A	chr12:13043955-13066600	4.95921	4.97829	7.58787	7.61218	8.22153	8.27192	2.63127				O
NM_000158	GBE1	chr3:81538849-81810950	3.34149	3.37698	6.01514	5.94329	5.66788	5.77432	2.61998			O	O		O		O
NM_177477	LYNX1	chr8:143845755-143859640	0.271069	0.40082	2.90676	2.98471	3.22466	3.11072	2.60979		O	O		O
NM_006919	SERPINB3	chr18:61322430-61329197	0.313924	0.348034	2.98043	2.88189	1.19012	0.961849	2.60018				O
NR_028402	CSRP2BP	chr20:18118498-18169031	0.166831	0	2.72768	2.63241	2.08271	2.02603	2.59663	O						O	O
NM_021063	HIST1H2BD	chr6:26158348-26171576	2.54982	3.25188	5.43704	5.54684	6.10001	5.62556	2.59109			O					O
NM_199511	CCDC80	chr3:112323408-112359977	1.82621	1.87698	4.41082	4.47453	4.27284	4.29236	2.59108			O			O		O
NR_033651	LOC100132891	chr8:72753776-72987819	0.418483	0.34556	2.90755	3.03397	2.65627	2.59937	2.58873			O	O	O		O	O
NM_003280	TNNC1	chr3:52485106-52488057	0.128656	0.340628	2.82166	2.80592	3.94141	4.00512	2.57915
NM_014279	OLFM1	chr9:137967088-138013030	1.63447	1.61834	4.135	4.2295	3.46853	3.42747	2.55585					O		O
NM_022060	ABHD4	chr14:23067146-23081265	4.71045	4.72662	7.26036	7.2835	7.40914	7.51587	2.55339				O			O	O
NR_026900	FLJ23867	chr1:180123967-180169859	2.93733	3.05243	5.50991	5.56804	6.08777	6.13624	2.54409
NR_028374	SNORA80B	chr2:10580507-10588453	0	0	0	5.07951	3.14856	3.4919	2.53975							O
NM_000093	COL5A1	chr9:137533651-137736688	3.20571	3.12777	5.67385	5.73474	6.05788	6.04053	2.53756							O
NM_003068	SNAI2	chr8:49830238-49833999	1.18236	1.24988	3.76268	3.73341	4.0952	4.25444	2.53193	O		O			O	O	O
NR_002920	SNORA8	chr11:93465526-93465665	4.13122	5.85979	7.03534	7.99524	6.73451	6.62991	2.51978
NM_001457	FLNB	chr3:57994126-58157982	3.409	3.48296	5.97681	5.95388	6.06167	5.96019	2.51936			O	O			O	O
NM_002256	KISS1	chr1:204159468-204165619	0.426135	0.342772	2.80984	2.9917	3.7471	3.75613	2.51632							O
NM_130847	AMOTL1	chr11:94501507-94609918	1.47884	1.53846	4.02964	3.99368	4.52503	4.52848	2.50301	O		O				O	O
NM_001323	CST6	chr11:65779461-65780976	4.2	4.26055	6.75172	6.70612	6.54414	6.36679	2.49864		O
NM_007310	COMT	chr22:19863039-20004309	0	0.00144924	2.6941	2.30009	0	0	2.49637		O			O
NR_003056	SNORD67	chr11:46765083-46867859	0	0	4.98907	0	4.98427	6.36613	2.49453
NR_002956	SNORA14B	chr1:235272657-235292256	3.56545	0	5.23506	3.28839	0	3.75271	2.479				O			O	O
NM_024692	CLIP4	chr2:29338307-29406679	3.67737	3.59254	6.09846	6.12439	6.17662	6.19204	2.47647			O				O	O
NM_003526	HIST1H2BC	chr6:26123694-26124132	2.85369	3.01157	5.25341	5.53215	5.46078	5.5431	2.46016
NM_004996	ABCC1	chr16:16043433-16236930	3.89374	3.90382	6.35605	6.35557	5.84563	5.80788	2.45703			O					O
NM_001993	F3	chr1:94994731-95007413	5.68446	5.70043	8.16783	8.10938	8.19818	8.20217	2.44617		O	O		O			O
NM_001204376	NPR3	chr5:32710742-32791830	1.53567	1.5245	4.01762	3.92968	3.77655	3.8235	2.44357			O					O
NM_001013642	TRNP1	chr1:27320194-27327377	0.181012	0.362326	2.70498	2.70627	3.96732	4.02317	2.43395			O
NM_153608	ZNF114	chr19:48774653-48790863	1.32793	1.18297	3.64628	3.71227	3.1189	3.3971	2.42382	O					O	O
NM_000146	FTL	chr19:49468565-49470136	11.6336	11.4306	13.9785	13.9198	14.1675	14.3352	2.41707							O
NM_031910	C1QTNF6	chr22:37576205-37584330	2.25072	2.28085	4.64349	4.71536	4.38796	4.38786	2.41364		O		O	O		O
NM_015516	TSKU	chr11:76493356-76509198	3.79555	3.60167	6.11608	6.08197	5.79253	5.43111	2.40041			O		O			O
NM_001261445	TXNRD1	chr12:104609556-104744085	1.97713	1.90958	4.38343	4.30339	4.01471	3.95968	2.40006			O			O		O
NM_002974	SERPINB4	chr18:61304492-61311502	0.398395	0.187455	2.78844	2.59394	0.924492	0.767721	2.39827
NM_001397	ECE1	chr1:21543739-21672034	1.41456	1.50395	3.86109	3.84557	3.18464	3.51574	2.39407				O
NM_052867	NALCN	chr13:101360578-102068813	0.372385	0.321483	2.74111	2.73516	2.22214	2.35066	2.3912	O		O		O			O
NM_052943	FAM46B	chr1:27331510-27339333	0.479515	0.501257	2.85841	2.89899	3.9201	3.91228	2.38831							O
NM_002639	SERPINB5	chr18:61144143-61172318	1.47599	1.46495	3.8438	3.84603	4.83662	5.09821	2.37445			O			O		O
NM_020311	CXCR7	chr2:237478379-237490994	0.194347	0.124452	2.46595	2.60131	1.45453	1.48527	2.37423
NM_007193	ANXA10	chr4:169013687-169108893	0.22067	0.25475	2.58777	2.61069	3.2681	3.46759	2.36152			O					O
NR_002327	SNORA10	chr16:2012061-2014827	0	4.23654	4.16993	4.7841	3.28912	0	2.35874
NM_001839	CNN3	chr1:95362506-95392735	4.05234	4.01863	6.35295	6.39172	6.84486	6.95546	2.33685	O		O		O
NR_030171	MIR492	chr12:95228173-95228804	0	0	0	4.66819	0	0	2.3341				O		O	O	O
NM_003543	HIST1H4H	chr6:26285353-26285727	1.24334	1.40759	3.69617	3.60615	4.43975	4.43431	2.32569							O
NM_152517	TTC30B	chr2:178414880-178417524	1.06124	1.21247	3.45255	3.44184	3.55525	3.47505	2.31034			O		O			O
NM_014178	STXBP6	chr14:25281305-25519095	1.81676	1.92969	4.11095	4.25223	4.55335	4.63319	2.30837			O	O	O			O
NM_001001936	AFAP1L2	chr10:116054582-116164515	1.20073	1.25265	3.44035	3.60934	3.20424	3.29336	2.29815	O		O	O			O	O
NM_001257180	SLC20A2	chr8:42273979-42408140	1.29641	1.46723	3.73527	3.6238	3.8589	3.99618	2.29771			O			O		O
NM_001792	CDH2	chr18:25530929-25757445	2.9576	2.94209	5.25645	5.23827	5.3701	5.41358	2.29752			O	O	O		O	O
NM_001257971	CTSL1	chr9:90340973-90346384	2.06278	1.78979	4.3413	4.09364	4.39153	4.19862	2.29118
NR_002576	SNORA21	chr17:37006320-37010053	0	3.68219	3.6298	4.6266	0	4.00669	2.2871
NM_000392	ABCC2	chr10:101542462-101611662	0.329707	0.232706	2.5598	2.57672	2.86998	2.79451	2.28705							O	O
NM_001193484	LIMS1	chr2:109150810-109303702	1.93571	1.52099	3.8733	4.14489	4.38805	4.39346	2.28075		O	O	O	O			O
NM_007069	PLA2G16	chr11:63341943-63381941	2.08421	2.04116	4.2823	4.39139	4.43045	4.44337	2.27416					O		O	O
NM_001112706	SCIN	chr7:12610202-12693228	3.11003	3.15236	5.37632	5.43334	5.3492	5.3941	2.27363			O	O	O	O		O
NM_004669	CLIC3	chr9:139889059-139891024	0.929352	0.854707	3.13285	3.19673	3.45097	3.5639	2.27276
NM_001135191	ASAP2	chr2:9346893-9545812	2.15011	1.84457	4.31224	4.21921	4.46083	4.43242	2.26838			O	O	O			O
NM_001018006	TPM1	chr15:63334837-63364113	4.10564	4.13713	6.29805	6.44514	6.61832	6.71174	2.25021					O			O
NM_012307	EPB41L3	chr18:5392387-5543986	0.668409	0.661656	2.91714	2.88893	2.7875	2.81795	2.238					O		O
NM_024843	CYBRD1	chr2:172378756-172414643	0.917008	0.771598	3.06653	3.09532	2.53837	2.45556	2.23662					O			O
NR_033878	LOC387895	chr12:127215246-127256808	0.565402	0.980426	3.17311	2.82664	2.23776	2.04344	2.22696
NM_004785	SLC9A3R2	chr16:2076868-2089027	0.404938	0.0759644	3.21739	1.70966	0.416448	2.03543	2.22307				O
NM_001139517	PRKRA	chr2:179059207-179672150	1.5512	1.74256	3.87215	3.86659	4.20806	4.06015	2.22249					O
NM_014365	HSPB8	chr12:119616594-119632551	1.2466	1.41572	3.53871	3.56106	4.05323	4.17333	2.21873
NR_002440	SNORD16	chr15:66791652-66797193	0	9.09661	6.76071	6.77273	6.71855	0	2.21842
NM_033260	FOXQ1	chr6:1312674-1314993	1.46184	1.29526	3.55111	3.63951	2.92428	2.74843	2.21676			O	O	O			O
NM_001845	COL4A1	chr13:110801309-110959496	3.46251	3.59909	5.686	5.80679	5.85043	5.92034	2.21559			O		O		O	O
NM_001025243	IRAK1	chrX:153275956-153285342	1.73953	1.42944	3.67848	3.91566	2.66273	2.59074	2.21258		O		O	O		O
NM_032525	TUBB6	chr18:12308256-12326568	3.33368	3.34322	5.52157	5.57785	5.59355	5.62812	2.21126			O		O		O
NM_052960	RBP7	chr1:10057254-10076078	1.37821	1.69119	3.75468	3.716	4.89862	5.16317	2.20064					O
NM_080593	HIST1H2BK	chr6:27106071-27114637	6.15123	6.03929	8.3248	8.26555	8.12465	8.17593	2.19992
NM_001164381	STAU2	chr8:74332308-74659943	0.346512	1.25368	2.82124	3.16849	1.96582	2.0811	2.19477			O		O		O	O
NM_152275	TTC30A	chr2:178479025-178483694	1.27738	1.31445	3.53171	3.44479	3.79703	3.76998	2.19233			O					O
NM_006470	TRIM16	chr17:15531279-15586193	4.42809	4.38588	6.54093	6.65169	6.07241	6.14121	2.18933								O
NM_000757	CSF1	chr1:110453232-110473616	2.3053	2.3738	4.47384	4.5672	3.17909	3.04036	2.18097			O		O		O
NM_002852	PTX3	chr3:156977531-157221415	0.357808	0.40966	2.58512	2.54121	2.1047	1.98346	2.17943			O	O	O		O	O
NM_001165978	PROM2	chr2:95940200-95957055	3.39915	3.38215	5.56485	5.57189	5.1001	4.99619	2.17772			O
NM_006399	BATF	chr14:75988783-76013334	3.68028	3.66898	5.78884	5.90916	5.03071	5.08104	2.17437			O	O		O	O	O
NR_003706	SNORA38B	chr17:65714060-65740266	0	3.57846	3.49346	4.4243	0	0	2.16965							O	O
NR_030223	MIR499A	chr20:33543703-33680618	0	0	4.3361	0	0	0	2.16805
NM_007085	FSTL1	chr3:120113060-120169918	4.75161	4.76753	6.91716	6.92908	6.65985	6.70177	2.16355	O	O	O	O	O			O
NM_182943	PLOD2	chr3:145787227-145879282	3.24562	3.39362	5.49641	5.46776	5.22629	5.35225	2.16246			O				O	O
NM_001159	AOX1	chr2:201450730-201536217	0.162973	0.103448	2.27265	2.30231	2.52116	2.67548	2.15427			O				O	O
NM_006398	UBD	chr6:29523388-29527702	0.703242	0.747936	2.92452	2.82547	1.67773	1.74658	2.14941	O					O	O
NM_000850	GSTM4	chr1:110198697-110208123	0.65611	0.0814051	2.44248	2.59039	3.19666	3.38781	2.14768							O
NM_015264	KIAA0930	chr22:45588122-45636650	0.431874	0.672138	2.79314	2.59444	1.97977	1.89355	2.14179							O	O
NM_016174	CERCAM	chr9:131182758-131199630	1.74194	1.69297	3.78306	3.92868	5.15659	5.18516	2.13841							O
NR_015379	UCA1	chr19:15939756-15947131	3.16898	3.15945	5.30498	5.29887	5.04748	5.12944	2.13772						O		O
NM_001554	CYR61	chr1:86046443-86049648	6.069	5.97505	8.09317	8.22297	9.06461	9.20192	2.13605			O	O			O
NM_001848	COL6A1	chr21:47401662-47424963	3.31508	3.20276	5.34553	5.42881	5.3185	5.1636	2.12825					O		O
NM_016267	VGLL1	chrX:135614310-135638966	0.0341863	0	2.1374	2.14028	2.72647	2.86815	2.12175
NM_187841	TRIM54	chr2:27505296-27531130	0.0588424	0.0354823	2.09414	2.23517	1.88557	2.18975	2.11749	O
NM_152321	ERP27	chr12:15066975-15091463	0.49618	0.526002	2.59253	2.64187	2.73172	3.02859	2.10611				O
NM_001628	AKR1B1	chr7:134127106-134143888	4.20137	4.1813	6.29875	6.29434	6.85653	6.94793	2.10521			O				O	O
NM_001012718	IL32	chr16:3115312-3119668	2.05583	2.42605	4.46308	4.22375	4.01923	4.33862	2.10247
NM_013272	SLCO3A1	chr15:92396937-92715665	0.813877	0.881474	2.97217	2.92134	3.06346	3.02544	2.09908			O		O		O	O
NM_006340	BAIAP2	chr17:79008946-79156964	1.8324	1.88799	3.86222	4.05263	3.50309	3.82087	2.09723			O
NM_001206747	CAV2	chr7:116139654-116148595	3.60324	3.61988	5.6956	5.70219	5.67102	5.638	2.08733	O		O	O		O		O
NM_013436	NCKAP1	chr2:183789604-183903229	5.73125	5.75222	7.84227	7.81468	7.42191	7.38899	2.08674			O		O			O
NM_145665	SPANXE	chrX:140785567-140786655	3.93229	4.1709	6.12002	6.14355	7.3487	7.43714	2.08019
NM_198460	GBP6	chr1:89829435-89853719	0.0575785	0.0728863	2.11675	2.13645	1.94192	2.07607	2.06137	O					O
NM_001199181	ATP2C1	chr3:130569368-130745646	1.53149	1.20562	3.48513	3.37449	1.95261	2.2964	2.06125		O	O			O	O	O
NM_002631	PGD	chr1:10459084-10480201	6.9429	6.94018	8.96386	9.02252	8.42187	8.44416	2.05165		O	O					O
NM_005725	TSPAN2	chr1:115590632-115632121	1.73784	1.81254	3.80185	3.84669	4.028	4.12305	2.04908			O				O	O
NM_001079842	OCIAD1	chr4:48833059-48863834	0.0647926	0.00547168	2.08558	2.08125	0.0728782	2.00882	2.04828		O		O		O	O	O
NM_001184917	PCYT2	chr17:79860071-79869340	0.846838	1.6068	3.31158	3.23806	2.99817	3.02181	2.048
NM_000313	PROS1	chr3:93591880-93692934	1.10872	1.28852	3.18981	3.30279	3.76686	3.82204	2.04768			O	O	O		O	O
NM_005803	FLOT1	chr6:30695510-30710453	2.59829	2.49431	4.60138	4.58342	4.48334	4.35664	2.0461
NM_000526	KRT14	chr17:39738530-39743147	0.0379301	0.0363252	2.12048	2.04179	3.088	3.1651	2.04401					O
NM_144710	42257	chr2:110300373-110371783	2.31238	2.38316	4.40633	4.35815	5.16197	5.12934	2.03447
NM_003129	SQLE	chr8:126010719-126034525	4.55291	4.60803	6.60181	6.62392	6.29277	6.37315	2.03239			O		O		O
NM_007361	NID2	chr14:52471519-52535946	0.461969	0.441956	2.46512	2.50018	3.6319	3.60759	2.03069				O	O		O	O
NM_005465	AKT3	chr1:243419306-244006886	0.565887	0.688174	2.6396	2.67158	3.50002	3.51339	2.02856			O				O	O
NM_003359	UGDH	chr4:39500374-39529218	5.01918	5.04035	7.0873	7.01671	6.38255	6.36755	2.02224								O
NM_001177306	PAM	chr5:102201526-102366808	0	0	1.75226	2.29184	2.42485	2.85513	2.02205		O		O	O		O	O
NM_003507	FZD7	chr2:202899309-202903160	2.34564	2.22296	4.25458	4.35509	4.18653	4.1728	2.02054			O		O			O
NM_022661	SPANXC	chrX:140335595-140336646	2.03461	1.96742	3.94009	4.09186	4.99591	5.1007	2.01496			O
NM_004000	CHI3L2	chr1:111770280-111786062	0	0.000119497	1.99845	2.0297	1.26181	1.3413	2.01402			O
NM_001114106	SLC44A3	chr1:95285897-95360803	1.46558	1.31455	3.51612	3.28952	2.99378	3.32494	2.01276		O	O					O
NM_001098272	HMGCS1	chr5:43287571-43313614	4.92026	5.00557	6.99272	6.95081	6.72345	6.82054	2.00885						O	O	O
NM_003994	KITLG	chr12:88886569-88974250	1.09791	1.24005	3.23236	3.1069	2.59325	2.33036	2.00065			O		O			O
NM_018684	ZC4H2	chrX:64135681-64254624	0.259077	0.186497	2.22036	2.22497	2.51645	2.72193	1.99988
NM_001256163	BIRC2	chr11:102217912-102249401	0.897047	1.28575	3.06399	3.10633	2.01556	1.90942	1.99376						O
NR_034147	LOC149773	chr20:57090434-57194948	0.593466	0.612132	2.60209	2.58221	3.01468	2.94368	1.98935
NM_001135146	SLC39A8	chr4:103172197-103266655	2.48399	2.52424	4.5232	4.46143	3.6291	3.26116	1.9882			O	O	O			O
NM_003966	SEMA5A	chr5:9035137-9546233	0.00322956	0.012176	2.00662	1.97292	2.14483	2.20587	1.98207					O
NM_001098845_dup1	null	chr10:48255224-48271368	0.0954527	0.0618508	2.08248	2.01713	1.19719	1.18634	1.97115
NM_001846	COL4A2	chr13:110959630-111165373	4.26784	4.35678	6.21678	6.34773	6.38251	6.41805	1.96995					O			O
NM_003544	HIST1H4B	chr6:26027123-26027480	0.538216	0.502163	1.87068	3.10742	0.936768	1.48146	1.96886						O
NM_145040	PRKCDBP	chr11:6340175-6341740	0.232084	0.219406	2.26536	2.12099	2.04905	1.97751	1.96743					O
NM_017885	HCFC1R1	chr16:3072625-3077756	1.86416	0	2.93164	2.85419	3.49335	2.98319	1.96083
NM_020728	ESYT2	chr7:158523688-158622319	3.57456	3.64155	5.53703	5.59414	5.33049	5.3011	1.95753		O	O	O				O
NM_000694	ALDH3B1	chr11:67776047-67796743	1.79982	1.79717	3.73069	3.76872	3.18591	2.81079	1.95121
NR_002918	SNORA48	chr17:7465308-7482324	3.25308	4.48136	4.8194	6.80891	5.17026	3.33402	1.94693
NM_002210	ITGAV	chr2:187454789-187545628	5.1473	5.0644	6.93376	7.171	7.01408	6.79435	1.94653					O			O
NM_001785	CDA	chr1:20915443-20945400	3.638	3.57287	5.45502	5.64272	5.6434	5.81804	1.94344					O		O	O
NM_002081	GPC1	chr2:241375114-241407495	3.40582	3.35185	5.28416	5.34911	5.1761	4.97506	1.9378		O					O
NM_001955	EDN1	chr6:12290528-12297427	2.49174	2.3076	4.30334	4.36998	4.01916	4.18311	1.93699			O					O
NM_014391	ANKRD1	chr10:92671856-92681032	0.940407	1.0823	2.94428	2.95203	5.12362	5.40594	1.9368			O				O
NR_003000	SCARNA21	chr17:7788122-7816075	0	0	0	3.86809	3.83124	3.27513	1.93405
NM_016201	AMOTL2	chr3:134074189-134093406	4.10541	4.06166	5.97156	6.04926	6.02466	5.96631	1.92688
NM_018192	LEPREL1	chr3:189674516-189840226	0.589963	0.229391	2.13559	2.53736	3.4665	3.04849	1.9268			O	O			O	O
NM_001425	EMP3	chr19:48828628-48833810	2.52882	2.54376	4.36103	4.55011	4.18637	4.16115	1.91928				O			O
NM_025216	WNT10A	chr2:219745254-219758651	0.687452	0.616786	2.54671	2.58771	2.16223	2.07243	1.91509
NM_001023587	ABCC5	chr3:183637723-183735727	1.82872	1.70982	3.77631	3.59107	3.62213	3.42125	1.91442					O
NM_002380	MATN2	chr8:98881310-99048946	0.444325	0.42355	2.40188	2.29058	1.91297	1.97396	1.91229					O		O	O
NM_005010	NRCAM	chr7:107788070-108096841	0.514667	0.571874	2.42655	2.47634	2.60614	2.40833	1.90817			O		O			O
NM_003380	VIM	chr10:17270257-17279592	1.65841	1.50431	3.37399	3.5882	5.59662	5.55501	1.89974					O
NM_001542	IGSF3	chr1:117117030-117210314	1.40885	1.76646	3.61941	3.35507	3.51992	3.55078	1.89959							O	O
NM_005497	GJC1	chr17:42875815-42908179	1.70097	1.32232	3.46036	3.3582	3.78074	3.55721	1.89764	O		O		O	O
NM_001130043	CRYZ	chr1:75171171-75232360	0.594323	0.614939	2.69326	2.27956	2.81693	3.17248	1.88178
NM_001135702	YWHAZ	chr8:101930803-101965623	4.03098	4.00176	5.88627	5.90465	6.77986	6.92197	1.87909		O		O		O	O	O
NM_018981	DNAJC10	chr2:183580998-183643255	5.06743	5.0328	6.94952	6.90786	6.99912	7.06604	1.87858			O		O			O
NM_012193	FZD4	chr11:86656716-86666440	0.747647	0.748076	2.61111	2.63477	2.37083	2.42885	1.87508			O				O	O
NM_005562	LAMC2	chr1:183155173-183214262	6.4506	6.46921	8.32092	8.34484	8.70541	8.71701	1.87298				O		O	O	O
NM_001466	FZD2	chr17:42634811-42638630	2.10715	2.19881	3.96282	4.07854	3.74616	3.7036	1.8677			O		O		O
NM_017791	FLVCR2	chr14:76044939-76114512	0.33341	0.131269	2.12361	2.07316	2.43008	2.6417	1.86605			O		O		O	O
NM_002427	MMP13	chr11:102813720-102826463	0.476456	0.514979	2.41655	2.30406	1.95597	1.97439	1.86459			O					O
NR_002970	SNORA37	chr18:51677970-51751158	0	0	0	3.72827	0	0	1.86413			O	O			O
NM_153490	KRT13	chr17:39657232-39661865	0.0256259	0.00314555	1.69606	2.05576	2.83108	2.91966	1.86152				O
NM_014189	ADD1	chr4:2845583-2931802	0.351692	1.44795	2.80783	2.70771	2.81197	2.54928	1.85795		O			O
NM_006403	NEDD9	chr6:11183530-11382581	3.16369	3.21163	4.9763	5.10011	5.2922	5.4447	1.85054			O	O			O	O
NM_005139	ANXA3	chr4:79472741-79531605	4.8815	4.82945	6.66634	6.74217	6.1183	6.2548	1.84878			O			O		O
NM_003395	WNT9A	chr1:228109164-228135676	0.778783	0.906315	2.80393	2.57286	2.23626	2.12614	1.84585							O
NM_005437	NCOA4	chr10:51565107-51590734	4.88932	4.87871	6.71724	6.73715	6.07033	6.25136	1.84318		O		O	O	O
NM_001951	E2F5	chr8:86089618-86132643	0.00363538	0.0381608	1.80022	1.91551	1.81732	0.216906	1.83697	O				O			O
NR_002584	SNORA69	chrX:118920468-118925606	0	0	3.65306	0	0	0	1.82653
NM_005708	GPC6	chr13:93879077-95060273	3.22559	3.21912	5.03825	5.05483	4.3133	4.31578	1.82418			O			O	O	O
NM_006142	SFN	chr1:27189632-27190947	4.16065	4.07506	5.85668	6.02636	6.52249	6.66052	1.82366
NR_002964	SNORA28	chr14:103800338-103811361	0	0	3.6456	0	3.67468	0	1.8228				O			O
NM_031313	ALPPL2	chr2:233271551-233275424	0	0.0150623	1.6963	1.95618	2.83573	3.00923	1.81871			O				O	O
NM_020351	COL8A1	chr3:99273152-99897476	1.21294	0.899702	2.78684	2.96293	1.97893	2.05662	1.81857			O	O			O	O
NM_001136018	EPHX1	chr1:225997796-226070420	4.98142	4.89089	6.7298	6.77918	6.26543	6.34433	1.81834					O		O	O
NM_001122821	SET	chr9:131445933-131458675	6.25622	6.13522	8.00689	8.01728	7.03782	7.10445	1.81637
NM_001080538	AKR1B15	chr7:134233848-134264592	0.223777	0.263659	2.03742	2.08142	1.53267	1.52043	1.8157	O		O					O
NM_014905	GLS	chr2:191745546-191830270	1.61918	1.67096	3.46853	3.45292	3.44398	3.46049	1.81566		O	O		O		O	O
NR_028301	LOC344595	chr3:106959538-107045811	0.566292	0.483751	2.31975	2.3569	3.54499	3.60446	1.8133
NR_002819	MALAT1	chr11:65265232-65273939	4.57366	4.33352	6.87953	5.64365	6.7988	5.76492	1.80801						O
NM_032587	CARD6	chr5:40841409-40855456	1.06911	1.11622	2.85785	2.9429	2.98185	3.19885	1.80771						O
NM_005909	MAP1B	chr5:71403117-71505397	3.3925	3.44204	5.21497	5.198	5.34366	5.38536	1.78922				O	O		O	O
NM_001236	CBR3	chr21:37504064-37528606	1.99612	2.21542	3.87568	3.91334	3.18413	3.0083	1.78874					O
NM_001042454	TGFB1I1	chr16:31483475-31489281	1.16925	1.10298	2.90906	2.93529	2.68957	2.7067	1.78606					O
NR_002586	SNORA63	chr3:186501360-186524484	5.78184	6.58757	6.70783	9.23205	7.45592	7.4792	1.78523
NM_021126	MPST	chr22:37415682-37425863	1.3824	1.20485	2.86588	3.29154	2.46658	2.35155	1.78509		O
NM_001130099	KIFC3	chr16:57792128-57836439	0.972432	1.68033	2.99072	3.21382	2.30334	2.44492	1.77589	O
NR_002959	SNORA18	chr11:93466631-93466763	5.13243	4.35148	5.56483	7.46887	7.18609	6.98525	1.7749
NM_022073	EGLN3	chr14:34393420-34420284	3.67056	3.46467	5.35679	5.32417	5.11216	5.12393	1.77287			O	O	O		O	O
NM_001267046	FRMD6	chr14:51921229-52197444	1.73348	1.87451	3.55912	3.59349	3.89797	3.98203	1.77231		O	O	O	O	O	O	O
NM_001295	CCR1	chr3:46243199-46249832	0.0839618	0.0927764	1.77304	1.94429	1.78568	1.89711	1.7703	O		O			O
NM_020777	SORCS2	chr4:7194373-7744564	0.338301	0.28019	2.06053	2.09653	1.82372	1.88706	1.76928			O					O
NM_001114108	TTC22	chr1:55246751-55266941	0.808518	0.907204	2.65059	2.60366	2.42301	2.34008	1.76926		O	O					O
NM_002889	RARRES2	chr7:150035406-150038763	1.46779	1.46637	3.0088	3.4618	1.73188	1.86507	1.76822
NM_003749	IRS2	chr13:110406183-110438914	1.70203	1.75209	3.42853	3.55816	3.71532	3.55444	1.76628		O	O	O			O	O
NM_170601	SIAE	chr11:124492741-124564687	0.722874	0.669683	2.4056	2.50986	2.38055	2.44285	1.76145
NM_178006	STARD13	chr13:33677271-34250932	1.18553	1.12433	2.85139	2.97199	3.0149	3.14831	1.75676			O	O			O	O
NM_004093	EFNB2	chr13:107142078-107187388	3.39756	3.3892	5.15217	5.13884	5.15941	5.173	1.75212			O		O		O	O
NM_024746	HHIPL2	chr1:222695601-222721444	0.218977	0.150626	2.03215	1.83754	2.00051	1.99055	1.75005	O		O	O			O	O
NR_004389	SNORA16B	chr1:212458878-212535205	0	0	0	3.49486	0	0	1.74743							O	O
NM_005780	LHFP	chr13:39917028-40177356	0.839781	0.999173	2.7023	2.63134	2.78699	2.63978	1.74735			O		O		O	O
NM_003659	AGPS	chr2:178257470-178408564	4.68367	4.6897	6.45451	6.41065	6.5454	6.50962	1.74589					O		O
NM_001498	GCLC	chr6:53362139-53409927	4.91678	4.91518	6.65451	6.66575	5.6104	5.62055	1.74415				O	O		O	O
NM_001005242	PKP2	chr12:32943679-33049780	2.64227	2.67921	4.39036	4.40058	4.6826	4.73947	1.73473			O				O
NM_001145436	LSS	chr21:47608359-47648738	1.14175	0.989654	3.21816	2.37037	2.44163	2.92664	1.72857					O
NM_017585	SLC2A6	chr9:136336215-136344276	1.96594	1.65616	3.45809	3.61885	3.31597	3.22963	1.72742	O				O
NM_001080953	PLAGL1	chr6:144261436-144385735	0.926913	0.863552	2.78571	2.44227	2.76092	2.75284	1.71876		O	O	O	O
NR_003276	CES1P1	chr16:55794510-55808826	0	0.0277551	1.70343	1.7564	1.64576	1.78771	1.71604								O
NM_002228	JUN	chr1:59246462-59249785	4.72794	4.6678	6.33716	6.47728	6.90069	6.84434	1.70935			O				O	O
NM_033086	FGD3	chr9:95709600-95798518	5.18596e-05	0.129292	1.74681	1.80078	1.79067	1.77137	1.70912			O		O		O	O
NR_038407	LINC00525	chr7:47801073-47806370	0.933756	1.01516	2.65476	2.70577	2.54524	2.75793	1.70581			O
NM_001145412	NFE2L2	chr2:178095030-178129859	5.03267	4.97057	6.72277	6.68734	6.40023	6.52134	1.70343					O	O
NM_015366	PRR5	chr22:45064426-45258664	0	0.200118	1.87644	1.72934	1.88922	1.69768	1.70283			O				O
NM_000240	MAOA	chrX:43515408-43606068	1.10675	1.14349	2.8072	2.81529	3.09709	3.10798	1.68613			O		O
NM_017664	ANKRD10	chr13:111530886-111567416	3.78764	3.98254	5.5729	5.56753	4.65746	4.57457	1.68512	O	O	O		O	O		O
NM_001723	DST	chr6:56137688-56615138	0.730536	0.862465	2.504	2.4523	3.04132	3.0698	1.68165	O		O		O		O	O
NM_006834	RAB32	chr6:146864827-146876086	3.36102	3.552	5.04773	5.22147	5.25606	5.46467	1.67809			O	O	O			O
NM_018306	TMEM40	chr3:12775391-12800808	1.07899	1.14512	2.78061	2.79466	3.6258	3.7017	1.67558
NM_001199417	ARHGAP23	chr17:36584719-36668628	1.19473	1.22248	2.90986	2.85263	2.54993	2.49779	1.67264			O	O	O		O
NM_022463	NXN	chr17:702552-882998	1.77081	1.95859	3.54738	3.51627	3.68982	3.51369	1.66712		O	O		O		O	O
NM_001126051	HDGF	chr1:156711898-156722240	5.17931	4.53241	6.30241	6.74137	5.77853	5.46491	1.66603
NM_183373	PXDC1	chr6:3722835-3752246	1.62441	1.76149	3.29349	3.42195	3.57407	3.53031	1.66477				O			O	O
NM_031484	MARVELD1	chr10:99473464-99477909	2.72868	2.63812	4.28029	4.41529	4.03272	4.05851	1.66439		O
NM_003568	ANXA9	chr1:150954498-150968114	1.5815	1.59284	3.26266	3.22709	3.76472	3.77243	1.6577
NM_133337	MYOF	chr10:95066185-95242074	3.17779	3.57849	5.12513	4.94641	4.07529	4.092	1.65763			O			O		O
NM_006680	ME3	chr11:86152149-86383678	0.883182	0.000172299	2.20395	1.99271	2.23276	2.74244	1.65665			O	O			O	O
NM_007207	DUSP10	chr1:221874763-221915516	2.33113	2.28038	3.93201	3.99239	4.2043	4.29889	1.65645			O	O			O	O
NM_145117	NAV2	chr11:19372270-20143147	1.18986	0.842396	2.47079	2.86131	2.54167	1.28983	1.64992	O	O	O	O			O	O
NM_024320	PRR15L	chr17:46029333-46035243	0.643055	0.757479	2.25922	2.43694	1.63201	1.74201	1.64782
NM_001110556	FLNA	chrX:153576899-153603006	6.31193	6.28181	7.90705	7.98208	7.78876	7.71005	1.64769				O
NM_001154	ANXA5	chr4:122589151-122618147	5.71825	5.65558	7.34188	7.32663	7.86239	7.98685	1.64734			O	O	O		O	O
NM_001005752	GJB3	chr1:35246789-35251967	1.82423	1.15563	2.91948	3.35399	3.2932	3.81535	1.64681		O				O
NM_023016	SOWAHC	chr2:110371910-110376564	1.43599	1.39053	3.02871	3.08665	3.18638	3.11679	1.64443			O		O		O	O
NR_002952	SNORA9	chr7:45022626-45026259	3.67771	0	3.44559	3.51646	0	0	1.64217
NM_000228	LAMB3	chr1:209788217-209825820	6.25351	6.20076	7.83024	7.8864	7.59323	7.52417	1.63119						O
NR_002953	SNORA11	chrX:54834170-54842445	0	0	0	3.26088	0	0	1.63044
NM_001909	CTSD	chr11:1490684-1785501	6.71669	6.65767	8.28771	8.3472	8.02934	7.90902	1.63028			O		O
NM_016246	HSD17B14	chr19:49316273-49339934	2.77048	2.73442	4.30165	4.46208	4.62713	4.63019	1.62941	O				O
NM_006072	CCL26	chr7:75398841-75419064	0.976908	1.13314	2.48691	2.88115	3.38564	3.36635	1.62901			O		O		O
NR_024543	SNHG7	chr9:139607023-139622636	1.32182	1.22531	2.92816	2.86875	3.00483	2.61501	1.62489					O
NM_030797	FAM49A	chr2:16730729-16847134	0.390231	0.28965	1.92094	2.00708	2.57042	2.69327	1.62407			O	O			O	O
NM_001098845	ANXA8L1	chr10:47157983-47174122	0.0163829	0.0467972	1.69418	1.61681	1.26128	1.16317	1.6239			O	O			O
NM_001164440	ANKRD33B	chr5:10564434-10657928	1.18277	1.25392	2.86643	2.8102	2.70361	2.65076	1.61997							O	O
NM_014578	RHOD	chr11:66824288-66839488	2.47135	2.55517	4.11244	4.15302	4.15745	3.94061	1.61947			O	O
NM_001100423	SPATS2L	chr2:201170603-201346986	3.40831	3.72937	5.1298	5.2434	4.65118	4.69069	1.61776			O	O		O	O	O
NM_001168375	KIAA0319	chr6:24544331-24646383	0.11369	0.174547	1.86356	1.65713	2.26184	2.40797	1.61623	O					O
NM_002718	PPP2R3A	chr3:135684514-135866752	1.50389	1.54739	3.15892	3.12342	3.57095	3.68778	1.61553	O		O		O	O	O	O
NM_001145710	LOC375190	chr2:24346349-24392507	0.55171	0.584598	2.13732	2.20915	2.32788	2.32628	1.60508
NM_002305	LGALS1	chr22:38071612-38075809	8.52663	8.39166	10.0599	10.0614	10.6455	10.6478	1.60151
NM_024725	CCDC82	chr11:96085928-96123083	3.10353	3.12135	4.7398	4.67951	4.71578	4.67071	1.59722
NM_003088	FSCN1	chr7:5632435-5646287	5.56111	5.50725	7.10458	7.15398	7.43824	7.25691	1.5951		O	O	O			O
NM_152419	HGSNAT	chr8:42995591-43057970	1.86053	1.92638	3.46503	3.50986	3.40398	3.33079	1.59399		O			O		O
NM_014039	C11orf54	chr11:93474792-93496247	3.10169	3.03457	4.66625	4.65501	4.61807	4.78641	1.5925
NM_152406	AFAP1L1	chr5:148651400-148721367	1.51255	1.67005	3.16265	3.20255	3.64451	3.65823	1.5913	O		O	O	O		O
NM_006366	CAP2	chr6:17393735-17558023	1.1323	0.962744	2.641	2.63541	1.94481	2.01014	1.59069					O		O
NM_173553	TRIML2	chr4:189012426-189026408	0	0.069629	1.56873	1.67063	2.2026	2.32781	1.58487			O				O	O
NM_177973	SULT2B1	chr19:49055428-49102684	2.75929	2.76401	4.30464	4.38136	4.21631	4.41077	1.58135							O
NM_206967	C16orf74	chr16:85741123-85784689	1.85578	2.01439	3.45136	3.58132	3.09176	3.18335	1.58125							O
NM_181342	FKBP7	chr2:179059207-179672150	1.29286	1.09144	2.8197	2.72157	3.46985	3.48823	1.57848					O		O
NM_004585	RARRES3	chr11:63014620-63330855	2.28753	2.14309	3.72206	3.85727	2.96746	3.01158	1.57436				O				O
NM_001172309	NEXN	chr1:78354199-78409578	0.377237	0.334429	1.94189	1.91057	1.80144	1.89954	1.57039					O
NM_004370	COL12A1	chr6:75794041-75915623	0.930999	0.953624	2.58313	2.44205	2.3437	2.50996	1.57028				O	O			O
NM_001248004	ARNTL2	chr12:27485786-27578746	3.75087	3.97433	5.46223	5.40231	4.96544	4.96551	1.56966			O					O
NM_016729	FOLR1	chr11:71900601-71907367	1.74455	1.78198	3.2947	3.37042	4.25487	4.27894	1.56929			O		O
NM_001130445	SSFA2	chr2:182756471-182795464	3.98147	3.91259	5.51149	5.52042	5.52187	5.55124	1.56892			O		O			O
NM_032413	C15orf48	chr15:45722726-45725647	3.43637	3.25748	4.97199	4.85677	4.96209	4.86977	1.56746		O				O
NM_182678	UBE2E3	chr2:181845111-181928150	1.81046	1.80727	2.36406	4.38815	3.14774	3.44427	1.56724			O	O			O	O
NM_032427	MAML2	chr11:95711439-96076344	1.78179	1.87924	3.38029	3.40674	3.03556	3.06411	1.56301			O					O
NM_000637	GSR	chr8:30535579-30585486	5.49674	5.40632	6.97477	7.04936	7.01011	7.01921	1.56053								O
NM_001142646	TPRA1	chr3:127291907-127309568	2.15994	2.1438	3.78654	3.6357	4.09691	3.48517	1.55925
NM_003537	HIST1H3B	chr6:26031816-26032288	0.272133	1.05765	1.68737	2.76057	1.10119	1.45038	1.55908
NM_014325	CORO1C	chr12:109038886-109125295	5.8056	5.81052	7.36808	7.36552	7.5194	7.55421	1.55874			O					O
NM_005504	BCAT1	chr12:24962957-25102393	2.88747	2.70874	4.28703	4.4194	4.59429	4.52256	1.55511	O		O			O	O	O
NM_020349	ANKRD2	chr10:99332255-99343641	3.10993e-05	3.59573e-05	1.58199	1.52085	1.38644	1.78299	1.55139	O		O	O
NM_003768	PEA15	chr1:160175124-160185162	5.08773	5.09798	6.63465	6.65196	6.82426	6.91379	1.55045					O
NM_019091	PLEKHA3	chr2:179059207-179672150	2.99932	2.98036	4.48989	4.58154	4.43038	4.43204	1.54587					O
NM_002506	NGF	chr1:115828536-115880857	1.383	1.36247	2.92537	2.90698	2.78109	2.92647	1.54344			O	O	O		O	O
NM_002185	IL7R	chr5:35856976-35879705	1.65267	1.62221	3.20139	3.15231	2.89219	2.94996	1.53941				O		O
NM_001131018	CIZ1	chr9:130928343-131017527	1.07048	0.611173	1.93067	2.82751	2.43701	2.1815	1.53827		O	O	O
NM_001139441	BCAP31	chrX:152965946-152990201	0.4486	0.639688	2.04213	2.12155	1.29723	2.22292	1.53769							O
NM_004227	CYTH3	chr7:6201411-6312242	3.01117	3.03432	4.52231	4.58791	4.96701	4.99605	1.53236			O		O		O
NM_005429	VEGFC	chr4:177604690-177713895	2.18512	2.15829	3.62524	3.78096	3.83695	3.97783	1.53139			O		O		O	O
NM_001204286	MUC1	chr1:155158299-155162706	4.96698	4.91976	6.51999	6.42227	5.51737	5.1324	1.52776
NM_182536	GKN2	chr2:69172363-69180102	0.259577	0.202967	1.7982	1.71708	0.407505	0.625139	1.52637								O
NR_027003	DKFZp434J0226	chr19:46713498-46718094	0.0918201	0.0662929	1.65394	1.55636	1.94116	1.98927	1.52609	O							O
NM_003255	TIMP2	chr17:76849058-76921472	5.04797	4.92194	6.4525	6.56591	7.3964	7.43702	1.52425				O
NM_133467	CITED4	chr1:41326727-41328018	0.695656	0.625341	2.1665	2.19756	2.31173	2.24081	1.52153			O		O			O
NM_006848	CCDC85B	chr11:65657874-65659106	2.46645	2.48733	4.04907	3.94734	5.06364	4.23111	1.52132
NM_020686	ABAT	chr16:8768443-8878432	2.49179	2.42192	3.97358	3.98178	4.56306	4.52924	1.52083			O				O	O
NM_002436	MPP1	chrX:154006958-154033802	1.65499	1.78049	3.31859	3.15636	3.31779	3.23877	1.51974					O
NM_005077	TLE1	chr9:84198597-84303596	3.0287	2.98801	4.52933	4.52045	4.20195	4.25466	1.51654			O	O	O		O	O
NR_033957	LOC643650	chr10:47096453-47151400	0.121578	0.171452	1.67488	1.64825	2.02356	2.04549	1.51505
NM_001261833	JRKL	chr11:96123157-96126727	1.93456	1.80574	3.44735	3.32224	3.58997	3.58982	1.51464			O		O			O
NM_003246	THBS1	chr15:39873279-39889668	4.11043	4.09772	5.62161	5.61106	5.16788	5.25958	1.51226			O	O			O	O
NM_004938	DAPK1	chr9:90112755-90323549	1.12637	1.19211	2.70275	2.63818	2.66307	2.69139	1.51122			O		O		O	O
NM_021181	SLAMF7	chr1:160709076-160724601	0.929893	0.896714	2.384	2.46159	2.8044	2.86957	1.50949						O	O
NM_014246	CELSR1	chr22:46756730-46933067	3.84026	3.89581	5.35846	5.39306	4.67621	4.54148	1.50773			O	O			O	O
NM_004839	HOMER2	chr15:83517728-83621476	1.37082	1.46938	2.89979	2.95512	2.86297	2.89357	1.50735					O
NM_012396	PHLDA3	chr1:201434621-201438299	2.79068	3.0166	4.29647	4.51816	4.75675	4.49779	1.50368		O	O				O	O
NM_181876	PPP2R2C	chr4:6322304-6565327	1.71913	1.49601	3.09019	3.12986	3.40781	3.48917	1.50245					O		O
NM_001008394	EID3	chr12:104609556-104744085	0.326847	0.631008	2.09111	1.86963	2.37451	2.27286	1.50144			O					O
NM_007223	GPR176	chr15:40092930-40213093	0.544147	0.516464	2.05691	2.00591	3.08734	3.01718	1.50111	O			O	O		O
NM_033316	MFI2	chr3:196728611-196756687	2.40925	2.57806	3.98766	3.99612	4.37824	4.25318	1.49824
NM_001165	BIRC3	chr11:102188180-102210135	4.19937	4.18882	5.72481	5.65696	5.59185	5.61916	1.49679			O			O	O	O
NM_181886	UBE2D3	chr4:103717132-103790032	3.13764	2.64694	4.37385	4.40297	4.08415	4.0797	1.49612		O				O		O
NM_001127582	ING4	chr12:6759703-6772308	1.33569	0.874769	2.398	2.80193	2.25408	2.52457	1.49473					O	O
NM_001098522	HTATIP2	chr11:20385230-20405329	3.31307	3.26666	4.70345	4.85981	4.58448	4.81809	1.49176					O			O
NM_201403	MOB3C	chr1:47073386-47082563	2.19772	2.24222	3.68108	3.73746	3.4346	3.50487	1.48929								O
NM_001242508	OSBPL1A	chr18:21742010-21977833	0.917226	0.21505	1.98029	2.12863	2.13233	2.21865	1.48832		O	O	O	O		O
NM_018471	ZC3H15	chr2:187350884-187374087	5.6988	5.721	7.2188	7.17752	7.04034	7.14384	1.48826			O					O
NM_145753	PHLDB2	chr3:111393522-111695364	1.13773	1.36163	2.74287	2.73159	2.73227	3.00868	1.48755		O	O			O	O	O
NM_000359	TGM1	chr14:24718319-24732416	0.454776	0.372067	1.81878	1.98287	1.75843	1.82193	1.4874
NR_002325	SNORA6	chr3:39448203-39454032	2.39928	3.06229	3.88602	4.54693	3.57393	2.5127	1.48569
NM_005794	DHRS2	chr14:24105572-24114848	1.55832	1.36838	2.95406	2.94289	5.59225	5.64293	1.48512
NM_001010000	ARHGAP28	chr18:6834431-6915712	1.09449	1.09474	2.60432	2.55499	2.58792	2.68805	1.48504			O				O	O
NM_152731	BEND6	chr6:56819772-56892142	0.661698	0.765752	2.19674	2.19699	2.02744	2.02121	1.48314			O		O			O
NR_028272	NEAT1	chr11:65190268-65194003	6.88237	6.699	8.53497	8.00869	8.86697	8.04403	1.48114						O
NM_001980	STX2	chr12:131274144-131323819	0.943936	1.08317	2.57336	2.40937	3.13095	3.05193	1.47781			O		O		O
NM_001243571	MTMR2	chr11:95566043-95657371	1.16005	1.0885	2.69734	2.50578	2.93931	2.92789	1.47728			O			O		O
NM_003542	HIST1H4C	chr6:26104175-26104565	0.639657	0.932044	2.03766	2.4834	2.0422	1.10475	1.47468						O
NM_172208	TAPBP	chr6:33267471-33282164	2.67461	2.35066	4.11613	3.85305	3.77506	3.36512	1.47195
NM_018173	PLEKHG6	chr12:6419601-6437672	1.49096	1.54927	2.98932	2.98869	3.46815	3.56418	1.46889					O		O	O
NM_001077186	MYH14	chr19:50706884-50813801	3.07824	3.09081	4.49181	4.61293	5.01848	4.883	1.46784			O				O
NM_002638	PI3	chr20:43803539-43805185	1.71	1.77535	3.35634	3.06275	2.29945	2.49175	1.46687	O					O
NM_012124	CHORDC1	chr11:89933596-89956532	4.36708	4.41119	5.89144	5.80517	5.83767	5.78033	1.45917			O		O		O	O
NM_201384	PLEC	chr8:144989320-145050913	3.17824	3.26244	4.77675	4.57846	4.57914	4.01402	1.45726			O	O				O
NM_001144070	ABCC3	chr17:48712217-48769063	2.34782	2.49992	3.94991	3.80962	3.223	2.85941	1.4559			O				O	O
NM_000140	FECH	chr18:55212072-55253969	2.14478	2.10096	3.58125	3.5722	3.34919	3.34741	1.45385
NM_012317	LDOC1	chrX:140269930-140271310	4.12106	3.89912	5.45716	5.46439	6.11939	5.83897	1.45069			O		O			O
NM_007106	UBL3	chr13:30338544-30424820	4.05284	4.10082	5.49862	5.55464	6.10901	6.02871	1.4498			O		O		O	O
NM_006169	NNMT	chr11:114166534-114183238	0.241706	0.27326	1.75749	1.65613	1.41201	1.68997	1.44933				O		O	O
NM_006158	NEFL	chr8:24808468-24814131	0.912602	1.04588	2.45006	2.40454	3.55315	3.59021	1.44806				O	O			O
NM_003474	ADAM12	chr10:127702901-128077127	0.531726	0.586193	1.96844	2.04035	1.90562	1.95209	1.44544			O	O			O	O
NM_001164446	C6orf132	chr6:42068856-42110715	2.03102	1.99695	3.44468	3.46897	3.07914	2.90268	1.44284		O		O
NM_030969	TMEM14B	chr6:10747994-10757214	5.96977	5.89035	7.2948	7.45	7.60348	7.68115	1.44234			O
NR_003001	SCARNA7	chr3:160212782-160283376	1.19896	0.763253	2.04722	2.79278	1.70966	1.92476	1.43889							O
NR_038393	LOC100506178	chr7:22602955-22613617	1.6853	1.77033	3.13328	3.18351	2.97454	3.03917	1.43058				O				O
NM_024430	PSTPIP2	chr18:43563501-43652250	1.89153	1.96532	3.37637	3.34015	2.92672	2.91547	1.42983			O				O	O
NM_001018024	MTCP1NB	chrX:154289899-154299547	2.17257	2.38885	3.72607	3.69073	3.3987	3.58016	1.42769
NM_014806	RUSC2	chr9:35490006-35563896	0.719086	0.660189	2.16284	2.06981	2.2981	2.57364	1.42669	O		O					O
NM_014601	EHD2	chr19:48216600-48246391	2.21118	2.08648	3.54421	3.6066	4.35021	4.18823	1.42658					O			O
NM_173492	PIP5KL1	chr9:130683807-130693076	1.14273	1.08524	2.50077	2.5747	3.66471	3.49479	1.42375		O	O
NM_138285	NUP35	chr2:183989082-184026408	4.58889	4.55537	5.99512	5.99588	5.69486	5.76729	1.42337			O				O	O
NM_021034	IFITM3	chr11:319672-320914	4.35238	4.11632	5.69457	5.61662	5.09034	5.11419	1.42125
NM_177996	EPB41L1	chr20:34679425-34820721	1.06851	1.08809	2.51	2.48597	2.46349	2.64093	1.41969					O		O
NM_013995	LAMP2	chrX:119560002-119603204	4.73211	4.68232	6.15502	6.09838	6.30803	6.27562	1.41949			O		O		O	O
NM_000202	IDS	chrX:148560294-148586884	4.58399	4.58117	6.01126	5.99211	6.30787	6.26898	1.4191			O					O
NM_003156	STIM1	chr11:3876932-4114440	2.82518	2.92461	4.2699	4.3164	4.09365	4.03595	1.41826					O
NM_001146068	CAPN2	chr1:223889294-223963720	3.13167	3.60347	4.78822	4.78277	3.64113	3.85866	1.41792				O				O
NR_037901	ARHGEF26-AS1	chr3:153742189-153975616	0.327654	0.33366	1.73771	1.75141	1.5222	1.58232	1.4139					O
NM_002178	IGFBP6	chr12:53491435-53496128	3.39477	3.29837	4.75502	4.76371	4.7633	4.5737	1.41279					O
NM_003048	SLC9A2	chr2:103236165-103327809	0.682127	0.746907	2.0914	2.16243	2.19052	2.23954	1.41239			O		O			O
NM_002353	TACSTD2	chr1:59041094-59043166	7.25285	7.26659	8.57241	8.76828	8.19713	8.29529	1.41062				O		O		O
NM_000422	KRT17	chr17:39775691-39780882	5.64927	5.59129	6.99875	7.05984	7.56725	7.45979	1.40901
NR_036555	C12orf36	chr12:13523604-13529679	0.643529	0.612462	2.08629	1.98432	2.53595	2.58604	1.40731			O				O	O
NM_199162	ADPRHL1	chr13:114076259-114107839	0.335817	0.403478	1.82635	1.71601	2.08414	2.17402	1.40153					O		O
NM_000295	SERPINA1	chr14:94843083-94857029	4.56221	4.58372	5.99936	5.94293	5.41305	5.57844	1.39818			O		O
NM_018071	ARHGEF40	chr14:21538526-21558036	1.21387	1.09847	2.48743	2.61853	2.68675	2.62768	1.39681
NM_201630	LRRN2	chr1:204586302-204654597	0.631922	0.240898	1.77327	1.8909	1.99779	1.87042	1.39568				O	O		O
NM_001003818	TRIM6	chr11:5617330-5706339	2.46267	2.4971	3.86951	3.87448	3.38572	3.39778	1.39211
NM_145754	KIFC2	chr8:145691737-145701718	2.16032	2.02295	3.52154	3.4442	3.85169	3.40026	1.39124
NM_017878	HRASLS2	chr11:63014620-63330855	0.118005	0.215229	1.54351	1.568	1.89546	2.00347	1.38914			O					O
NM_001199	BMP1	chr8:22022652-22069840	1.66305	1.89257	3.09779	3.2361	3.09531	2.97585	1.38913		O
NM_001145199	C12orf75	chr12:105724413-105765296	3.81031	3.72538	5.10479	5.2064	6.34854	6.31421	1.38775			O	O	O		O	O
NM_139158	CDK15	chr2:202671151-202760273	0.0655347	0.000142592	1.29063	1.54826	1.41984	1.31382	1.38661			O				O	O
NM_024307	GDPD3	chr16:30116130-30124878	0.702537	0.654313	2.08056	2.04949	1.64569	1.84297	1.3866					O
NM_001560	IL13RA1	chrX:117861558-117928496	4.32629	4.3778	5.70879	5.75711	5.29597	5.35881	1.38091		O		O	O			O
NR_003051	RMRP	chr9:35657747-35658015	7.24674	7.58061	7.56093	10.0278	8.52279	8.57878	1.38067						O
NM_133373	PLCD3	chr17:43189007-43209891	2.33709	2.38489	3.73241	3.74813	4.70828	4.56783	1.37928
NM_001173982	CHST11	chr12:104850691-105155792	1.89232	1.99521	3.30594	3.33854	3.59304	3.70971	1.37848	O		O		O		O
NM_002310	LIFR	chr5:38475064-38595507	1.87691	2.05993	3.45274	3.23967	3.55675	3.70233	1.37778			O	O	O		O	O
NM_001030060	SAMD5	chr6:147829827-147891157	0.437247	0.419057	1.77181	1.83976	2.29789	2.17358	1.37763			O		O			O
NM_152313	SLC36A4	chr11:92880849-92931095	2.99184	3.00117	4.40299	4.3452	4.32883	4.34204	1.37759
NM_006799	PRSS21	chr16:2867163-2871718	1.62161	1.70726	2.84429	3.23827	3.01953	2.81155	1.37685
NM_017549	EPDR1	chr7:37960162-37991542	2.76693	2.93169	4.31897	4.13061	4.5322	4.38187	1.37548		O			O			O
NM_052839	PANX2	chr22:50609159-50618724	2.34343	2.31248	3.68842	3.70925	3.84556	3.53781	1.37088
NM_004165	RRAD	chr16:66955581-66959439	0.276941	0.462391	1.71577	1.76516	1.47319	1.15155	1.3708
NM_005531	IFI16	chr1:158979681-159024945	0.705505	0.70016	2.00283	2.1419	2.25633	2.20731	1.36953			O			O	O
NM_016462	TMEM14C	chr6:10723147-10731362	5.81877	5.82831	7.15295	7.23017	7.27129	7.31315	1.36803				O			O
NM_016613	FAM198B	chr4:159045731-159094202	0.287667	0.267538	1.70345	1.58402	1.02967	1.0533	1.36613			O			O	O	O
NM_017704	ANKRD49	chr11:94227152-94232744	3.11814	2.95805	4.38155	4.42419	4.05554	4.10781	1.36477
NM_006745	MSMO1	chr4:166248817-166264314	5.2866	5.24898	6.6517	6.60872	6.47439	6.71742	1.36242					O
NM_139350	BIN1	chr2:127805598-127864903	1.4579	1.25737	2.73762	2.7019	2.12994	2.10024	1.36213				O	O		O	O
NM_001793	CDH3	chr16:68678150-68732957	3.99624	4.01039	5.32999	5.39878	5.20726	5.28007	1.36107					O			O
NM_001256821	RIT1	chr1:155867598-155881193	0.30535	0.180238	1.50118	1.7063	0.958915	1.02237	1.36095	O					O
NM_012168	FBXO2	chr1:11708417-11723384	2.20091	2.09504	3.41775	3.59907	4.13936	3.97488	1.36043
NM_012242	DKK1	chr10:54074040-54077417	2.95956	2.90279	4.2665	4.31583	6.25841	6.39479	1.35999					O		O	O
NR_024204	LINC00152	chr2:87754973-87821030	1.5005	1.40951	2.91993	2.70947	2.86988	3.03196	1.3597		O	O	O			O	O
NM_014679	CEP57	chr11:95523624-95565857	3.69674	3.74262	5.12527	5.0333	4.70877	4.83506	1.3596			O					O
NM_152432	ARHGAP42	chr11:100558406-100861656	2.38142	2.40582	3.74787	3.75395	3.36992	3.31689	1.35728			O	O			O	O
NM_004822	NTN1	chr17:8924858-9147317	2.40445	2.39184	3.67521	3.83444	3.89535	3.89185	1.35668			O		O		O
NM_030915	LBH	chr2:30454396-30482899	2.63085	2.76631	3.99972	4.11035	3.83234	3.87232	1.35646			O		O			O
NM_001136205	KCTD1	chr18:24034873-24237365	0.435367	0.170421	1.47223	1.84255	0.897688	0.896758	1.3545		O	O	O	O			O
NM_001142395	PRRG1	chrX:37208527-37316548	0.900958	1.0768	2.37087	2.31398	3.07576	2.87929	1.35355	O		O		O
NM_005572	LMNA	chr1:156052368-156109880	5.25644	5.19109	6.54398	6.6079	6.62494	6.33764	1.35217		O			O
NM_031415	GSDMC	chr8:130760441-130799134	0.40235	0.277341	1.74877	1.63438	1.15985	1.10519	1.35173			O			O	O	O
NM_005591	MRE11A	chr11:94150468-94227040	2.49507	2.48079	3.81555	3.86244	3.61273	3.73879	1.35107
NR_004407	RNU11	chr1:28975111-28975246	3.13782	0	2.88338	2.95421	3.83717	0	1.34988						O
NM_001004125	TUSC1	chr9:25676386-25678856	1.29285	1.36863	2.64804	2.71234	2.41418	2.40711	1.34945		O	O		O			O
NM_003509	HIST1H2AI	chr6:27775976-27776445	0.919062	1.23121	2.15933	2.68947	2.15671	1.87972	1.34927
NM_024087	ASB9	chrX:15262108-15288589	0.0997165	0.6981	2.0297	1.46331	0.754072	1.29131	1.3476	O					O
NM_003954	MAP3K14	chr17:43325302-43394414	1.06493	1.20618	2.58163	2.38075	2.87013	2.95226	1.34564			O
NM_000495	COL4A5	chrX:107683073-107940775	1.65453	1.69709	3.00638	3.03406	3.58233	3.66576	1.34441
NM_003816	ADAM9	chr8:38854504-38962779	6.28765	6.32371	7.65669	7.63862	7.55646	7.51655	1.34198			O					O
NM_005063	SCD	chr10:102106771-102124588	6.6358	6.67524	8.00137	7.99311	7.72447	7.73868	1.34172					O
NR_004378	SNORD94	chr2:86333304-86369280	4.41784	2.72652	4.14127	5.68285	2.76149	3.0873	1.33988
NR_024611	HINT1	chr5:130494874-130501034	2.83897	2.63801	4.07645	4.07617	3.29134	3.67481	1.33782		O		O	O	O	O	O
NM_017565	FAM20A	chr17:66531256-66597095	4.21802e-05	6.4801e-06	1.40226	1.27309	0.111784	4.73348e-05	1.33765								O
NR_038271	LOC100506866	chr2:179059207-179672150	0.799484	0.726671	2.15512	2.04571	2.31474	2.26518	1.33734
NM_001162862	COX11	chr17:52978051-53046064	0.968069	0.162001	2.49365	1.3083	2.05562	1.55481	1.33594		O			O		O	O
NM_006317	BASP1	chr5:17217749-17276943	6.54051	6.62019	7.89026	7.94016	8.10462	8.10331	1.33486			O	O	O		O	O
NM_020962	IGDCC4	chr15:65673824-65715410	0.451997	0.396752	1.73325	1.77481	1.3352	1.22878	1.32966			O
NM_001543	NDST1	chr5:149887673-149937773	3.47591	3.53861	4.81788	4.85495	4.5482	4.52313	1.32915			O	O				O
NM_199242	UNC13D	chr17:73823307-73840798	3.3549	3.31531	4.68292	4.64447	3.84837	3.70969	1.32858		O					O
NM_020943	CWC22	chr2:180809603-180871780	3.26086	3.31586	4.62376	4.60475	4.36352	4.48494	1.32589			O					O
NM_015238	WWC1	chr5:167719064-167899308	2.91363	2.91532	4.16249	4.31795	4.61208	4.50592	1.32575			O					O
NM_001243756	PXN	chr12:120639093-120703574	3.43981	3.60568	4.86507	4.8313	5.1553	5.10895	1.32544			O					O
NM_198855	ZNF211	chr19:58144534-58154147	0.384652	0.00414096	1.28973	1.74731	1.8078	1.29368	1.32412		O
NM_003538	HIST1H4A	chr6:26021906-26022278	0.575171	0.926263	1.79786	2.35051	1.39727	1.79651	1.32347
NM_001003679	LEPR	chr1:65886130-66103176	1.75412	1.67856	2.98007	3.09952	2.72501	2.71354	1.32345
NM_000805	GAST	chr17:39868577-39872221	0	0.125498	1.15127	1.61802	3.77229	4.00583	1.3219
NM_000188	HK1	chr10:71029755-71161637	4.45395	4.49835	5.7724	5.81539	6.05037	6.01838	1.31774		O	O		O		O	O
NM_018159	NUDT11	chrX:51232862-51239459	1.47135	1.46896	2.72508	2.84896	3.57806	3.57043	1.31686
NM_020982	CLDN9	chr16:3062456-3064506	1.8617	1.65539	2.92069	3.23012	2.87091	2.98529	1.31686
NM_138567	SYT8	chr11:1855673-1858750	0.330874	0.39034	1.61997	1.73367	0.881329	0.732951	1.31621					O		O
NM_006622	PLK2	chr5:57749809-57755966	5.48521	5.51717	6.82318	6.81096	6.85819	6.8999	1.31588				O	O	O		O
NM_002211	ITGB1	chr10:33189245-33247293	6.95855	6.94507	8.25678	8.27427	8.41659	8.50205	1.31372		O	O				O	O
NM_005451	PDLIM7	chr5:176910394-176924602	4.86774	4.76811	6.09892	6.1603	5.98729	5.78982	1.31169
NM_022772	EPS8L2	chr11:706119-727727	5.41424	5.35435	6.69741	6.69051	6.61087	6.41673	1.30967
NR_037946	HNRNPUL2-BSCL2	chr11:62457733-62494857	0.442015	0.959091	1.90435	2.11584	2.0874	2.39843	1.30954					O
NM_001747	CAPG	chr2:85621870-85641197	1.6468	1.85787	2.89973	3.21629	3.18615	3.35794	1.30568					O
NM_001014834	PAK4	chr19:39616419-39670046	0.00253379	0.00147114	1.03828	1.57587	0.0122204	0.00181018	1.30507		O		O	O		O
NM_001203263	IL17RC	chr3:9958757-9975305	0.148483	1.4029	2.24995	1.91	2.08422	0.933342	1.30428			O		O
NM_020314	C16orf62	chr16:19566736-19712485	3.11492	3.06161	4.37402	4.41006	3.96617	4.04514	1.30378					O
NM_138801	GALM	chr2:38893051-38961909	2.65969	2.6593	3.93525	3.99007	3.89182	4.0689	1.30316								O
NM_001146102	PARP9	chr3:122246759-122294049	1.21396	1.2443	2.65491	2.40868	1.78905	1.92002	1.30266		O			O		O
NR_040092	LOC100506990	chr8:12294521-12523097	0.567206	0.575593	1.80344	1.94411	2.48234	2.47723	1.30238							O
NM_006442	DRAP1	chr11:65686727-65689048	5.27598	5.42734	6.62948	6.67799	6.84278	6.86296	1.30207
NM_001144755	MYBL1	chr8:67474409-67525480	1.0959	1.00735	2.28753	2.4179	2.53265	2.58907	1.30109					O		O	O
NM_144581	C14orf149	chr14:59939405-59951073	1.80923	1.85369	3.10378	3.16129	2.96323	2.78136	1.30107
NM_003877	SOCS2	chr12:93959403-93969978	0.710121	0.743178	2.01404	2.04055	1.68393	1.79515	1.30065		O		O	O			O
NM_001199302	CNOT2	chr12:70636773-70748773	3.05063	2.75203	4.27208	4.13014	4.34069	4.49382	1.29979		O	O	O		O	O	O
NM_001099645	RPL22L1	chr3:170582664-170588045	4.81122	4.86945	6.1325	6.14347	6.34489	6.53894	1.29764			O			O	O
NM_152926	CPNE1	chr20:34213952-34252878	4.12384	4.13813	5.46429	5.3912	5.35552	5.30327	1.29676		O
NM_001134445	DDAH1	chr1:85784167-86044046	0.807981	0.77741	2.10262	2.07614	2.37275	2.7365	1.29669			O	O	O	O	O	O
NM_013322	SNX10	chr7:26331514-26413949	2.62189	2.49643	3.87034	3.84037	4.09551	3.52184	1.29619		O	O		O		O	O
NM_015036	ENDOD1	chr11:94822973-94865815	1.77655	1.83523	3.05358	3.1443	3.95522	3.98314	1.29305			O		O
NM_006755	TALDO1	chr11:747431-765024	7.91855	7.85695	9.16071	9.19972	8.58389	8.67464	1.29246			O		O
NM_002313	ABLIM1	chr10:116190868-116444414	1.76005	1.88373	3.16228	3.06627	3.06529	2.71457	1.29238			O					O
NM_018147	FAIM	chr3:138327541-138352213	1.14694	1.49825	2.63169	2.59668	2.27457	2.22696	1.29159		O	O		O
NM_002589	PCDH7	chr4:30722029-31148423	0.324804	0.560153	1.71356	1.75298	2.64922	2.4517	1.29079			O	O			O	O
NR_045562	GULP1	chr2:189156395-189460652	2.64495	2.69543	3.99226	3.92943	4.25103	4.11197	1.29066								O
NM_001261454	GPR1	chr2:207040041-207082771	0.0249135	0.018055	1.38378	1.24023	1.11225	1.40756	1.29052							O
NM_138420	AHNAK2	chr14:105403590-105444694	1.85606	1.97448	3.19049	3.21841	3.80287	3.81036	1.28918
NM_001377	DYNC2H1	chr11:102980159-103350591	0.500881	0.61906	1.8848	1.81251	2.43591	2.50295	1.28868			O		O	O	O	O
NM_015368	PANX1	chr11:93862093-93915137	3.61478	3.63834	4.88939	4.93984	4.82293	4.85948	1.28805			O				O	O
NM_144506	KLK8	chr19:51499263-51504958	0.120505	0.172979	1.4668	1.40032	1.33578	1.77694	1.28682					O
NM_001145715	KPNA7	chr7:98771196-98805089	0.732592	0.865133	2.04622	2.12	2.24774	2.16887	1.28425				O				O
NM_198686	RAB15	chr14:65381078-65569227	2.75178	2.87093	4.07776	4.11014	4.23677	4.2496	1.28259			O
NM_021632	ZNF350	chr19:52467592-52490079	1.42832	1.49295	2.67414	2.80923	3.01472	3.13787	1.28105
NM_031302	GLT8D2	chr12:104382764-104443915	0.558866	0.571096	1.70172	1.98616	2.31064	2.49224	1.27896					O		O
NR_004403	SNORD97	chr11:10818592-10830582	5.97789	6.91953	6.27175	9.17859	6.80932	7.19041	1.27645
NM_020335	VANGL2	chr1:160370363-160398468	2.4531	2.41453	3.71877	3.69992	3.77802	3.68303	1.27553		O	O	O	O		O
NM_001452	FOXF2	chr6:1390068-1395832	0.62654	0.655687	1.84153	1.98956	1.54921	1.26598	1.27443
NR_033698	FNTA	chr8:42911441-42940932	0.593423	1.18309	2.33254	1.99078	1.15056	1.69558	1.2734					O			O
NM_144781	PDCD2	chr6:170884659-170893780	0.031826	0.0755096	0.994825	1.65729	1.61098	1.04955	1.27239		O			O			O
NM_014957	DENND3	chr8:142138719-142205900	2.1548	2.14926	3.44917	3.39929	3.82489	3.83359	1.2722			O	O			O
NM_001606	ABCA2	chr9:139901685-139931234	1.57804	0.00289442	2.55007	1.57523	2.38118	2.40154	1.27219
NM_198276	TMEM17	chr2:62727355-62733604	1.83102	1.75319	2.95594	3.16993	3.05377	3.06044	1.27083			O	O			O	O
NM_001256829	LOC100862671	chr16:30751511-30756517	4.18395	4.22682	5.536	5.41441	4.82227	4.66503	1.26982
NM_005461	MAFB	chr20:39314516-39317876	0.348877	0.344068	1.54191	1.68866	1.23309	1.11549	1.26881		O		O	O		O	O
NM_024508	ZBED2	chr3:111260925-111371206	2.09027	2.23967	3.37239	3.49513	4.18216	4.29486	1.26879				O	O			O
NM_003536	HIST1H3H	chr6:27777841-27778314	0.563387	0.346479	1.87221	1.57307	2.29453	1.97825	1.26771
NM_022965	FGFR3	chr4:1795038-1810599	0.471457	0.530259	1.76769	1.7639	0.641496	0.974378	1.26494							O
NM_014781	RB1CC1	chr8:53535017-53627026	2.85573	2.70194	3.94772	4.13492	4.16604	4.2687	1.26249		O	O		O		O	O
NM_001002249	ANAPC11	chr17:79849598-79858363	2.18936	2.52697	3.61691	3.62007	3.91999	3.39312	1.26032		O
NM_003661	APOL1	chr22:36649116-36663577	3.16977	3.2077	4.41848	4.47955	3.94361	3.9943	1.26028
NM_007368	RASA3	chr13:114747193-114898095	2.47595	2.48514	3.69523	3.78485	3.38509	3.36062	1.25949			O	O	O		O
NM_003183	ADAM17	chr2:9629410-9695917	4.51425	4.45221	5.75186	5.73309	5.59531	5.64957	1.25924			O				O	O
NM_178569	C5orf38	chr5:2752261-2755511	0.710338	0.858379	1.99633	2.0905	1.99397	1.453	1.25906			O		O		O	O
NM_201224	DDX47	chr12:12966279-12982915	1.4152	0	1.33859	2.59296	2.47888	1.89912	1.25818			O					O
NM_018344	SLC29A3	chr10:73079009-73123147	1.75364	1.70794	3.00602	2.97085	3.06169	3.01389	1.25764		O		O	O		O
NM_001018003	SORBS3	chr8:22409250-22433008	2.2089	2.14526	3.39936	3.46762	2.83796	2.68304	1.25641		O	O	O
NM_000402	G6PD	chrX:153759605-153793261	6.84268	6.71843	8.02471	8.04831	8.16543	8.12431	1.25595
NM_001171888	FGFR1OP2	chr12:27091304-27119581	2.55883	2.69355	3.87917	3.87463	3.86506	4.13304	1.25071		O	O					O
NM_017425	SPA17	chr11:124492741-124564687	1.93599	1.91223	3.19099	3.15702	3.73735	3.97039	1.24989
NM_175054	HIST4H4	chr12:14923653-14924065	1.63183	1.65153	2.77249	3.00384	2.45271	2.36858	1.24648		O				O		O
NM_145305	SLC25A43	chrX:118533257-118588437	1.7997	1.77022	2.97184	3.08844	2.96184	2.98333	1.24518					O		O
NM_018423	STYK1	chr12:10771537-10826891	1.92114	1.89566	3.13107	3.16909	3.10878	3.27167	1.24168					O
NM_030955	ADAMTS12	chr5:33527286-33892124	0.0698848	0.0774493	1.33644	1.29268	1.35987	1.32904	1.24089			O	O				O
NM_014945	ABLIM3	chr5:148521053-148639999	1.22966	1.28308	2.54574	2.44508	4.01659	3.98451	1.23904		O	O	O			O	O
NM_153480	IL17RE	chr3:9944295-9958084	0.867534	0.768344	2.14823	1.96404	1.9401	1.87482	1.2382
NR_027122	ESRG	chr3:54156692-55108584	0	0.0284352	1.29216	1.21229	2.21547	1.98371	1.23801				O
NM_005882	MAEA	chr4:1283671-1333925	1.11311	0.465504	2.36888	1.68478	1.04938	1.31063	1.23753		O			O		O
NM_001145548	ZDHHC7	chr16:85008066-85045141	1.79417	1.60282	2.7993	3.07008	2.76491	3.00012	1.23619			O		O		O
NM_032687	CYHR1	chr8:145675314-145691031	1.05766	0.753863	2.23244	2.04984	2.40611	2.32183	1.23538
NM_001197114	IQCJ-SCHIP1	chr3:158787040-159615155	1.81332	1.47423	2.8828	2.8753	3.03148	3.11052	1.23527
NM_001177640	DAG1	chr3:49506135-49573051	0.37485	0.772231	1.91064	1.7038	2.34661	0.793201	1.23368			O		O		O
NM_001014380	KATNAL1	chr13:30776766-30881624	0.946042	0.44692	2.06794	1.79131	2.53743	2.49696	1.23315			O		O		O	O
NM_001040439	MAPK8IP3	chr16:1756220-1820318	0.000618817	0.00845549	1.32546	1.14901	0.00252967	0.0216076	1.2327		O			O
NM_002845	PTPRM	chr18:7567313-8406859	1.28652	1.31798	2.56954	2.49983	2.81657	2.7922	1.23243			O	O	O		O	O
NM_001995	ACSL1	chr4:185676748-185747215	2.76636	2.67494	3.91058	3.99188	3.50485	3.59222	1.23058		O			O			O
NM_152666	PLD5	chr1:242251688-242687998	1.86143e-05	1.29781e-05	1.17358	1.27888	0.921612	1.07169	1.22621			O	O			O	O
NM_005662	VDAC3	chr8:42249278-42263455	5.89445	5.96441	7.12575	7.18191	6.97424	7.15058	1.2244			O		O
NM_015987	HEBP1	chr12:13127798-13153243	4.20585	4.26809	5.43024	5.49234	5.78318	5.88536	1.22432			O		O			O
NM_021019	MYL6	chr12:56552044-56555366	9.22793	9.26572	10.4509	10.489	10.307	10.412	1.22316
NM_001144903	TM6SF1	chr15:83776323-83806111	0.000705858	0.000101225	1.33417	1.10822	0.00853888	0.00110612	1.22079
NM_000852	GSTP1	chr11:67351065-67354124	9.20158	9.13579	10.3229	10.4543	10.833	10.9569	1.2199
NM_001256526	C9orf69	chr9:139006426-139010731	0.00165431	0.00120597	1.54095	0.897279	0.579071	0.00144618	1.21769		O		O	O
NM_016463	CXXC5	chr5:139028300-139062680	3.35249	3.35423	4.52206	4.61129	4.36784	4.36626	1.21332				O	O		O
NM_001142350	THOC6	chr16:3072625-3077756	0.00118932	1.43154	1.96255	1.895	1.14576	0.986323	1.21241
NM_001620	AHNAK	chr11:62201015-62314332	2.82937	3.17394	4.25054	4.17663	4.17746	4.27906	1.21193		O		O
NR_027256	TREML3P	chr6:41176291-41185685	0.0387781	0	1.2383	1.21905	1.19339	0.947597	1.20928
NM_005026	PIK3CD	chr1:9711789-9884550	0.825581	0.887277	2.01784	2.11204	2.28478	2.33304	1.20851					O		O
NM_001199160	USP19	chr3:49145478-49158371	0.39466	0.00716009	0.789321	2.02914	0.259426	0.303763	1.20832		O			O
NM_001170820	IFITM10	chr11:1490684-1785501	0.382217	0.295828	1.54991	1.54143	1.21013	1.31686	1.20665							O
NM_001008397	GPX8	chr5:54408798-54469005	2.66956	2.54464	3.80258	3.82196	3.86357	3.97864	1.20517
NM_000381	MID1	chrX:10413349-10851809	3.20659	3.12773	4.34313	4.39784	4.40437	4.49967	1.20333			O		O	O		O
NM_012288	TRAM2	chr6:52362199-52441862	2.62125	2.59116	3.84643	3.77154	3.68498	3.65445	1.20278							O
NM_016235	GPRC5B	chr16:19870292-19896151	0.836003	0.739765	2.0346	1.94635	1.78754	1.77112	1.20259			O		O
NM_020802	KIAA1377	chr11:101761404-101871793	0.779326	0.78353	2.00597	1.96085	2.00848	1.98983	1.20198			O		O	O	O	O
NM_001421	ELF4	chrX:129198894-129244688	0.226889	0.652988	1.84605	1.43432	1.07007	1.33938	1.20025			O	O	O		O
NM_001080394	KIAA0146	chr8:48173488-48648563	4.36775	4.2889	5.5173	5.53939	5.16095	5.24149	1.20002
NM_020888	KIAA1522	chr1:33207511-33240571	4.4074	4.40104	5.59056	5.61672	5.30866	4.77251	1.19942		O		O			O
NM_022912	REEP1	chr2:86441119-86565206	4.30569e-05	0.189324	0.940889	1.64692	1.81224	1.45165	1.19922					O		O
NM_002254	KIF3C	chr2:26149454-26205443	2.41749	2.58743	3.63279	3.77006	4.01771	4.02514	1.19897			O				O	O
NM_004101	F2RL2	chr5:75699148-76003957	7.11553e-05	3.37252e-05	1.23603	1.16184	2.29466	2.22645	1.19888						O
NM_021220	OVOL2	chr20:18004795-18038521	2.03662	1.93889	3.15903	3.21251	2.79111	2.75883	1.19801					O		O
NM_005655	KLF10	chr8:103661004-103667983	3.88244	3.7364	4.94947	5.06326	4.93246	5.04532	1.19695		O	O	O		O	O	O
NM_001627	ALCAM	chr3:105085556-105295757	6.75046	6.73632	7.94928	7.93091	8.13862	8.17585	1.19671			O	O			O	O
NM_002705	PPL	chr16:4932507-4987136	3.85908	3.84668	5.00387	5.09354	5.10698	5.03895	1.19582
NM_005561	LAMP1	chr13:113951468-113977741	6.58692	6.51975	7.70677	7.79124	7.99548	7.81785	1.19567		O	O		O
NM_001083924	C1orf116	chr1:207191865-207206101	2.00411	1.93446	3.11958	3.20729	3.68258	3.83229	1.19415								O
NR_047700	MYO16-AS1	chr13:109248499-109860355	0	0	1.16935	1.21721	0.284464	0.31409	1.19328			O	O			O	O
NM_024519	FAM65A	chr16:67562716-67580691	2.03701	2.0587	3.29856	3.1836	3.53109	3.40007	1.19323							O
NM_001161403	LIMS2	chr2:128395995-128439360	0.14101	0.125127	1.2743	1.37778	1.86881	1.69322	1.19297
NM_002184	IL6ST	chr5:55230924-55290821	3.88902	3.87774	5.10668	5.03671	5.05309	5.03284	1.18831						O	O
NM_170692	RASAL2	chr1:178060642-178448648	1.34032	1.27516	2.54985	2.43947	2.87827	2.81953	1.18692	O		O			O	O	O
NM_052932	TMEM123	chr11:102267055-102323775	7.42645	7.4599	8.61104	8.64202	8.87528	8.89917	1.18335		O		O	O			O
NM_001142298	SQSTM1	chr5:179224597-179285840	2.39772	2.0852	3.50094	3.34792	2.31323	2.62667	1.18297		O		O
NM_001114171	FOSB	chr19:45971252-45978437	1.86891	0.904586	2.9728	2.16647	0.0158237	1.53648	1.18289		O		O			O	O
NM_178834	LAYN	chr11:111411232-111432470	0.660316	0.506184	1.70131	1.82972	2.37096	2.52475	1.18226			O			O		O
NM_001202498	UBE2H	chr7:129470572-129592800	4.06619	4.00979	5.23938	5.19965	4.72694	5.13053	1.18152			O	O				O
NM_004337	OSGIN2	chr8:90914095-90940095	2.45503	2.61465	3.70484	3.72539	3.62282	3.97629	1.18028		O	O	O	O	O	O	O
NM_178564	NRBP2	chr8:144915754-144923146	1.57022	1.44639	2.78419	2.59203	2.87837	2.50639	1.17981					O
NM_001042413	GLIS3	chr9:3824127-4300035	1.20202	1.30897	2.4886	2.38143	2.05595	1.98931	1.17952			O	O			O	O
NM_006994	BTN3A3	chr6:26440699-26453643	1.27273	1.15572	2.40914	2.37799	2.10129	2.07809	1.17934
NM_006454	MXD4	chr4:2249159-2263739	1.70621	1.84095	2.87836	3.02563	2.60923	2.47596	1.17841					O
NM_002758	MAP2K6	chr17:67410837-67538470	0.713778	0.547966	1.97406	1.64416	1.66672	1.5637	1.17824		O	O					O
NM_020190	OLFML3	chr1:114522029-114524875	0	0	1.17027	1.18396	1.15781	0.949637	1.17711							O
NM_001198683	LEPROT	chr1:65886130-66103176	1.2661	1.36004	2.42176	2.55805	2.64658	2.86434	1.17684		O	O		O		O	O
NM_007270	FKBP9	chr7:32997004-33046543	3.53937	3.6717	4.7834	4.77142	4.70107	4.61811	1.17188	O				O
NM_015470	RAB11FIP5	chr2:73300509-73340146	1.82822	1.76554	2.94231	2.99284	3.50956	3.58063	1.1707					O
NM_005319	HIST1H1C	chr6:26055967-26056699	6.01117	5.98295	6.99238	7.34303	8.44224	8.75603	1.17064		O	O			O
NM_002016	FLG	chr1:152274650-152297679	0.203681	0.248422	1.4712	1.32159	1.70767	1.55187	1.17034
NM_173170	IL36RN	chr2:113816214-113822320	0.00745176	0.0500074	1.26311	1.1345	1.73338	1.63369	1.17008
NM_001145056	SLC44A2	chr19:10713120-10755235	0.359595	0.696133	1.6838	1.71084	3.63451	3.98625	1.16946		O	O		O		O
NM_001012967	DDX60L	chr4:169277885-169401638	1.33336	1.3309	2.55016	2.44632	2.59589	2.70678	1.16611		O	O		O	O	O	O
NM_145313	RASGEF1A	chr10:43689983-43762367	0.375654	0.501046	1.5639	1.6438	2.25017	2.18618	1.1655				O			O
NM_016614	TDP2	chr6:24650204-24667115	4.85228	4.7779	5.96687	5.99378	5.91152	6.01638	1.16523			O					O
NM_004528	MGST3	chr1:165600109-165625372	4.77492	4.8868	6.01597	5.97542	6.48607	6.51817	1.16484	O				O		O
NR_027082	SFTA1P	chr10:10826401-10836877	0.707978	0.748794	1.96718	1.81378	0.983776	1.08621	1.16209			O	O		O	O	O
NM_007287	MME	chr3:154797435-154901518	0.420122	0.386752	1.47421	1.65673	2.51055	2.18265	1.16204				O	O			O
NM_006179	NTF4	chr19:49564396-49567124	0.339183	0.394861	1.52023	1.53695	1.95496	1.4986	1.16157
NM_004905	PRDX6	chr1:173446485-173457946	5.89144	5.79594	7.0053	7.00461	7.13804	7.20288	1.16127					O			O
NM_001136050	DHRS1	chr14:24759803-24769039	4.174	4.0707	5.28087	5.28515	5.26938	5.36794	1.16066
NM_018284	GBP3	chr1:89472359-89488549	3.03566	3.13847	4.21462	4.27891	3.48742	3.64434	1.1597						O
NM_001136180	HSBP1L1	chr18:77724581-77730822	2.39178	2.84038	3.77735	3.77209	3.33937	3.11996	1.15864	O
NM_019086	VSIG10	chr12:118501397-118541810	2.78062	2.74514	3.94221	3.90027	3.59877	3.64052	1.15836		O
NM_001039349	EFEMP1	chr2:56093096-56151298	3.58145	3.63913	4.73167	4.80556	5.0822	5.11582	1.15833			O		O			O
NM_001105568	KIF13A	chr6:17759413-17987854	1.33874	1.26818	2.4321	2.49071	2.19603	2.23333	1.15795			O		O		O	O
NM_020353	PLSCR4	chr3:145910123-145968966	1.09493	1.11992	2.12151	2.40531	2.78011	2.60726	1.15599	O	O	O		O			O
NM_153347	TMEM86A	chr11:18720350-18747777	0.710563	0.68344	1.81393	1.88477	3.29116	3.34238	1.15234				O	O			O
NR_002326	SNORA64	chr16:2012061-2014827	3.70286	5.73719	4.4011	7.34327	5.4052	0	1.15216
NM_007286	SYNPO	chr5:149980641-150038792	2.07722	1.99345	3.19191	3.18207	3.61996	3.62466	1.15165		O	O				O
NM_005401	PTPN14	chr1:214522038-214725024	1.5366	1.5817	2.74045	2.67911	3.02561	2.95815	1.15063	O		O	O			O	O
NM_001136023	NFE2	chr12:54685890-54694821	0.173817	0.222826	1.29794	1.39944	0.96177	1.0891	1.15037
NM_001136204	RCC2	chr1:17733250-17766250	3.77318	1.82023	3.6768	4.21724	0.00220169	1.33728	1.15031			O			O	O	O
NM_005908	MANBA	chr4:103552642-103682151	2.96799	2.91179	4.04074	4.13815	4.16376	4.2536	1.14955			O	O	O			O
NM_181336	LEMD2	chr6:33738989-33756906	2.07082	2.29481	3.40596	3.25696	3.45137	2.85243	1.14865		O			O
NM_002133	HMOX1	chr22:35777059-35790207	3.04454	3.06519	4.12257	4.28234	5.06405	5.15001	1.14759			O	O	O			O
NM_032409	PINK1	chr1:20959947-20978004	2.83351	2.73756	3.88547	3.98045	4.72191	4.77049	1.14742
NR_038956	LOC100506714	chr22:45529638-45559662	2.66237	2.50092	3.74015	3.71782	3.83867	3.81571	1.14734
NM_001039775	AIM1L	chr1:26648349-26680621	0.942681	0.834988	2.00182	2.06893	2.89239	2.92668	1.14654			O				O
NM_001035230	RABGAP1L	chr1:174128551-174964445	1.39812	1.6974	2.45906	2.92911	2.40823	2.6992	1.14633		O	O		O	O	O	O
NM_018205	LRRC20	chr10:72058728-72142382	2.31638	2.23505	3.36388	3.4797	3.7277	3.88249	1.14607			O				O	O
NM_001039712	DEDD	chr1:161070345-161102478	1.21533	1.77699	2.8203	2.46014	2.39006	2.07845	1.14406		O
NM_022153	C10orf54	chr10:73156690-73575704	1.00471	1.00948	2.10159	2.20024	2.91457	2.82673	1.14382							O
NM_005729	PPIF	chr10:81107219-81115089	5.23774	5.16542	6.34442	6.34473	6.39573	6.40725	1.143	O			O			O
NM_001121	ADD3	chr10:111705316-111895323	4.13801	4.13938	5.3085	5.25406	4.31462	4.33548	1.14258				O
NR_002973	SNORA40	chr11:93468275-93468402	8.98895	8.55732	9.99103	9.83984	8.96108	9.57289	1.1423
NM_001145652	C6orf141	chr6:49518112-49519808	0.989321	1.01998	2.27376	2.01956	2.41614	2.11681	1.14201							O	O
NM_003528	HIST2H2BE	chr1:149856009-149858232	2.59785	2.51027	3.62118	3.77066	3.76406	3.611	1.14186
NM_001166038	ZNF260	chr19:37001588-37019248	0.00016302	0.000304752	1.3276	0.956437	1.20391	1.50296	1.14178					O
NM_002318	LOXL2	chr8:23154409-23261722	2.12819	2.13593	3.25149	3.29191	3.82585	3.8395	1.13964				O				O
NM_002966	S100A10	chr1:151955385-151966714	10.5035	10.4912	11.5464	11.7213	11.62	11.7866	1.13651								O
NM_016341	PLCE1	chr10:95753745-96088148	1.0879	1.03214	2.18495	2.20686	1.86257	1.96896	1.13589		O	O	O	O			O
NM_003632	CNTNAP1	chr17:40834631-40852011	0.392617	0.383636	1.50519	1.54207	1.27053	1.22349	1.13551
NM_006803	AP3M2	chr8:42010463-42028701	1.55905	1.75656	2.77086	2.81568	3.06493	3.13794	1.13547		O		O	O		O
NM_001080480	MBOAT1	chr6:20100934-20212670	2.77037	2.64127	3.86303	3.81802	3.73751	3.73092	1.1347			O		O		O	O
NM_000636	SOD2	chr6:160100148-160114353	6.81497	6.82188	7.92351	7.98152	7.18819	7.11549	1.13409				O				O
NM_003527	HIST1H2BO	chr6:27861202-27861669	2.59598	2.33924	3.43061	3.76939	2.4774	3.00586	1.13239
NM_003567	BCAR3	chr1:94027342-94312706	3.78288	3.78377	4.83872	4.99158	4.84732	4.96571	1.13183		O	O	O	O	O	O	O
NM_001127321	CBX5	chr12:54624730-54673915	1.04462	1.1719	2.2494	2.23054	2.00225	2.01155	1.13171	O					O
NR_024553	ZNF204P	chr6:27325601-27343153	1.31447	1.3116	2.44034	2.44732	2.88248	3.1041	1.1308
NM_001204961	PBX1	chr1:164528596-164821060	0.712785	0.863644	1.86201	1.97559	2.26564	2.21577	1.13059			O	O	O		O	O
NR_003017	SNORA71C	chr20:37049238-37064018	3.19269	0	0	5.45003	0	0	1.12867
NM_001258299	KIAA1598	chr10:118642887-118886097	1.28134	1.3444	2.48164	2.40047	2.69715	2.91264	1.12819			O			O	O	O
NM_031450	C11orf68	chr11:65684282-65686531	2.70636	2.82659	3.99577	3.79185	3.53795	3.50027	1.12734
NR_024101	FLJ35776	chr18:3496029-4455266	1.9879	1.61004	3.0058	2.84511	3.2259	3.13565	1.12648
NM_024721	ZFHX4	chr8:77523113-77779521	1.048	1.12159	2.25474	2.1655	2.29789	2.2984	1.12532			O					O
NM_000577	IL1RN	chr2:113875469-113891593	0.0736668	0.158841	1.24065	1.2398	2.17498	2.36105	1.12397							O
NM_014059	RGCC	chr13:42031541-42045013	1.32958	1.34174	2.36591	2.55241	1.43626	1.59439	1.12349					O		O
NM_013363	PCOLCE2	chr3:142536701-142608045	1.0416	0.733617	1.88371	2.13781	2.09366	2.27039	1.12315			O		O		O	O
NM_001549	IFIT3	chr10:91087601-91100725	1.24931	1.44188	2.44887	2.48711	1.76127	1.79224	1.1224			O
NM_014214	IMPA2	chr18:11981426-12030885	4.40445	4.48021	5.49252	5.63682	5.84718	5.84908	1.12234		O	O	O	O			O
NM_181785	SLC46A3	chr13:29274217-29293150	1.36685	1.23288	2.33593	2.50597	3.14968	3.04113	1.12109				O	O		O	O
NM_145798	OSBPL7	chr17:45884732-45899147	1.73185	1.68993	2.85946	2.80381	3.10909	2.85754	1.12075					O		O
NM_001204824	KCNQ3	chr8:133133104-133493004	0.015191	0.0216003	1.07788	1.19936	0.783597	0.534293	1.12022			O		O		O	O
NM_003702	RGS20	chr8:54764367-54871863	1.73387	1.9524	2.92314	3.00241	2.79374	2.82466	1.11964							O	O
NM_001123	ADK	chr10:75910942-76469061	4.63003	4.73603	5.78871	5.81263	5.60685	5.74495	1.11764			O		O		O	O
NM_021630	PDLIM2	chr8:22436253-22455538	0.697945	0.626234	1.79805	1.76085	1.6316	1.89365	1.11736			O
NM_018915	PCDHGA2	chr5:140710251-140892548	1.01008	1.32308	2.31885	2.24616	0.989468	1.52836	1.11592
NM_001553	IGFBP7	chr4:57845108-58071465	0.717968	0.567152	1.72609	1.79046	2.50701	2.54371	1.11572			O	O		O	O	O
NM_005174	ATP5C1	chr10:7830092-7849762	2.95726	2.70252	3.78895	4.1022	3.79703	3.84761	1.11568					O
NM_002508	NID1	chr1:236139131-236228481	1.17554	1.15967	2.29222	2.27259	3.48258	3.45805	1.1148			O	O	O		O
NM_020814	42067	chr2:217122584-217236750	0.0273044	0.0428417	1.09868	1.1988	1.99568	1.98219	1.11367
NM_001201362	HMGN3	chr6:79910961-79946517	1.132	1.2878	2.50949	2.13661	2.71896	2.66213	1.11315			O	O			O	O
NM_004924	ACTN4	chr19:39138266-39235114	7.26001	7.24356	8.36093	8.36698	8.28375	8.25389	1.11217			O					O
NM_025015	HSPA12A	chr10:118430702-118502085	0.205885	0.23591	1.31242	1.35276	1.36164	1.39007	1.1117		O			O		O
NM_198535	ZNF699	chr19:9405985-9415795	1.01413	1.2389	2.21508	2.25893	2.23731	2.35984	1.11049			O					O
NM_001258372	SPATA20	chr17:48624449-48633213	1.22381	1.37956	2.3235	2.49847	2.00215	2.10237	1.1093					O
NM_001260512	MGST1	chr12:16500075-16530123	2.08227	2.19457	3.13086	3.36412	2.42217	2.93694	1.10907			O	O				O
NM_030882	APOL2	chr22:36622254-36636000	3.37277	3.34175	4.47492	4.45621	4.08408	4.02099	1.10831
NM_014903	NAV3	chr12:78225068-78606790	0.332306	0.374561	1.48868	1.43471	1.4061	1.41405	1.10826			O	O				O
NM_001102669	RRAS2	chr11:14299465-14386052	0	0	1.19132	1.02457	1.76154	1.8187	1.10794		O	O	O	O		O	O
NM_001024943	ASL	chr7:65540775-65558329	0.00204562	0.496023	1.62945	1.08084	1.37996	0.340948	1.10611				O	O		O
NM_004324	BAX	chr19:49458116-49465055	3.49202	3.44046	4.60482	4.53448	4.91686	4.5835	1.10341		O
NM_033520	C19orf33	chr19:38794199-38806606	7.68119	7.81497	8.78398	8.91899	8.13268	8.43095	1.1034
NM_005668	ST8SIA4	chr5:100142638-100238987	1.29151	1.32682	2.46156	2.36296	2.11636	2.08643	1.1031			O	O			O	O
NM_032021	TMEM133	chr11:100862810-100864666	1.79016	2.02008	3.05518	2.95913	2.86986	2.89629	1.10203			O				O	O
NM_006310	NPEPPS	chr17:45608443-45700642	4.89612	4.91886	6.01412	6.00403	5.72395	5.80894	1.10158			O					O
NM_001352	DBP	chr19:49133816-49140639	2.74116	2.28473	3.57151	3.65544	4.97142	4.83169	1.10053					O
NM_005896	IDH1	chr2:209100952-209119806	5.72348	5.78699	6.83442	6.87534	6.51795	6.58113	1.09964		O			O
NR_044993	LOC100506394	chr13:114567149-114569805	0.10109	0.114226	1.17319	1.24128	2.27307	2.2403	1.09958
NR_026562	C20orf24	chr20:35201875-35274619	3.49125	3.23269	4.42278	4.49626	4.2506	4.20346	1.09755		O			O
NM_199346	PFN4	chr2:24338243-24346151	0.365971	0.345608	1.26267	1.64241	1.84023	1.96022	1.09675			O					O
NM_012290	TLK1	chr2:171847332-172087824	3.49157	3.28241	4.54179	4.42457	4.12201	4.0826	1.09619			O		O			O
NM_013231	FLRT2	chr14:85996487-86094270	1.49584	1.53379	2.60701	2.61387	2.95071	2.9013	1.09562			O				O	O
NM_001565	CXCL10	chr4:76932332-77033955	0.1412	0.103196	1.32889	1.10531	0.689756	0.724821	1.0949	O
NR_033196	ZFAND1	chr8:82613565-82633539	2.63834	0.0211641	2.02361	2.82362	0	2.81027	1.09387					O
NM_001369	DNAH5	chr5:13690436-13944589	1.52726	1.65088	2.70292	2.6627	2.2762	2.32489	1.09374			O	O			O	O
NM_001012964	KLK6	chr19:51461886-51472929	1.71996	1.8319	2.83809	2.89633	2.2613	2.23237	1.09128				O	O
NM_003879	CFLAR	chr2:201980876-202037411	0.0549958	0.416143	1.19668	1.45527	0.000607088	0.275972	1.09041		O						O
NM_178040	ERC1	chr12:1100403-1605099	1.61378	2.05273	2.85076	2.9942	3.24056	3.32188	1.08923				O	O			O
NM_203377	MB	chr22:36002810-36019401	2.58654	2.55066	3.73952	3.57385	3.03694	2.42428	1.08808
NM_000837	GRINA	chr8:145064225-145067583	0	0.715034	1.1766	1.71273	2.04974	2.13815	1.08715							O
NR_046072	NKX3-1	chr8:23536205-23540450	1.75819	2.09254	3.0181	3.00647	1.7904	1.54709	1.08692		O	O	O	O			O
NM_145888	KLK10	chr19:51515999-51523431	1.03209	0.976606	2.07292	2.10921	1.87091	1.57631	1.08672	O
NR_034121	LOC100131067	chr5:80256507-81047072	0.59682	0.391466	1.69356	1.46814	1.34673	1.4185	1.08671
NM_001458	FLNC	chr7:128470482-128499328	2.27672	2.32892	3.39982	3.37869	3.73116	3.63543	1.08643				O			O
NM_020992	PDLIM1	chr10:96997329-97050781	6.19283	6.17172	7.25679	7.28033	7.08469	7.18158	1.08629			O					O
NM_001305	CLDN4	chr7:73245192-73247015	7.90524	7.87996	8.9796	8.97813	8.96453	8.83708	1.08627
NM_001098477	GRSF1	chr4:71681498-71705627	1.02406	1.14763	1.87899	2.46505	1.903	2.12623	1.08617		O			O
NR_003503	GGT8P	chr2:91963367-91970153	0.476926	0.545173	1.64886	1.54344	1.66606	1.4735	1.0851				O			O
NM_003106	SOX2	chr3:181328150-181459005	5.65893	5.68477	6.70686	6.80217	6.07135	6.02861	1.08266			O	O	O			O
NM_182760	SUMF1	chr3:4402828-4508966	2.89724	2.84366	3.92494	3.97481	4.15715	4.26882	1.07942		O			O
NM_002505	NFYA	chr6:41040706-41108573	0.44967	0.28539	1.26396	1.62921	1.76858	1.6173	1.07905		O			O
NM_206873	PPP1CA	chr11:67159422-67169376	2.37172	2.43363	3.43377	3.5236	2.93759	2.93378	1.076					O
NM_001142616	EHBP1	chr2:62900985-63275656	2.06267	2.22741	3.22147	3.22009	2.78606	2.89424	1.07574	O		O	O	O		O	O
NM_005195	CEBPD	chr8:48649475-48650726	3.65472	3.44181	4.57879	4.666	3.22183	2.69757	1.07413			O		O		O	O
NM_052906	ELFN2	chr22:37763999-37823505	2.23376	2.33836	3.36807	3.35231	3.17912	3.04198	1.07413				O			O
NM_016099	GOLGA7	chr8:41348080-41368499	4.54871	4.39867	5.49304	5.60083	5.65239	5.76179	1.07325		O	O		O		O
NM_020947	KIAA1609	chr16:84509965-84538288	2.08341	2.01637	3.09559	3.14964	3.41843	3.50462	1.07273
NM_006705	GADD45G	chr9:92219926-92221469	0.750227	0.81465	2.04246	1.66557	1.49357	1.58964	1.07158		O		O	O		O
NM_006851	GLIPR1	chr12:75874512-75905418	1.89194	1.98537	3.03821	2.98222	3.08013	3.15823	1.07156						O	O	O
NR_048564	IL1R2	chr2:102608305-102644884	0.403825	0.404915	1.36924	1.58201	3.28099	3.45637	1.07125	O							O
NM_004899	BRE	chr2:28004265-28561767	1.61036	1.53802	2.69328	2.59711	2.99984	3.06022	1.071		O
NM_001164637	ENDOV	chr17:78234659-78411884	0	0	1.28272	0.858661	1.49741	1.65558	1.07069
NM_001023560	ZNF187	chr6:28234787-28245980	0.858381	1.16096	2.02478	2.13593	1.98714	2.16356	1.07068
NR_046240	LOC100506100	chr9:131486740-131534198	2.91952	2.85209	3.94989	3.96221	4.66718	4.89276	1.07024					O
NM_001029859	KCTD21	chr11:77882297-77899664	1.83408	1.64676	2.80581	2.8151	2.94411	2.91008	1.07004			O		O
NM_001080497	MEGF9	chr9:123363195-123476765	2.58501	2.66733	3.66953	3.72236	3.37336	3.31632	1.06977		O	O		O			O
NM_178497	C4orf26	chr4:76481257-76491103	0.322521	0.522485	1.45654	1.51931	2.44204	2.5319	1.06542			O				O
NM_001012727	AGPAT2	chr9:139567594-139581911	1.26897	1.61909	2.49172	2.52334	2.61029	2.21682	1.0635							O
NM_182915	STEAP3	chr2:119981383-120023227	1.95955	2.00634	3.05665	3.03526	2.68562	2.70339	1.06301		O	O		O		O
NM_020120	UGGT1	chr2:128848753-128953249	3.46065	3.47595	4.51875	4.54334	4.65679	4.64019	1.06274		O	O		O		O	O
NM_000713	BLVRB	chr19:40953690-40971725	6.84397	6.81584	7.84518	7.93609	7.8449	7.85361	1.06073
NM_003784	SERPINB7	chr18:61420280-61472610	0.551101	0.605271	1.71386	1.56271	2.87995	3.15255	1.0601			O		O		O	O
NM_174921	C4orf34	chr4:39529458-39640481	4.89991	4.78444	5.8707	5.93368	5.40682	5.58951	1.06001
NR_045622	NABP1	chr2:192542797-192553248	0.509128	0.797726	1.62557	1.79492	1.51094	1.73494	1.05682			O	O				O
NM_021727	FADS3	chr11:61640997-61659006	2.90351	2.90228	3.96383	3.95384	4.49805	4.48643	1.05595					O
NM_001193557	ENY2	chr8:110346551-110358189	3.14214	3.2682	4.26088	4.26134	4.15915	4.20227	1.05594					O
NM_001140	ALOX15	chr17:4534213-4544960	0.51152	0.654815	1.63669	1.63866	1.66199	1.54131	1.05451							O
NM_001267571	TBC1D2	chr9:100961279-101018003	1.66803	1.71409	2.69282	2.79695	3.61822	3.72758	1.05382		O	O	O			O
NM_199328	CLDN8	chr21:31586323-31588469	0.0780013	0.0555833	1.09079	1.14945	0.81247	0.843032	1.05333								O
NM_001235	SERPINH1	chr11:75273100-75283849	5.54722	5.43166	6.50649	6.57834	5.53779	5.48501	1.05297		O		O	O		O
NM_024042	METRN	chr16:765172-767480	1.86776	2.10918	2.96093	3.12094	3.78478	3.63479	1.05247							O
NM_021980	OPTN	chr10:13142081-13180276	2.0165	2.14145	3.1202	3.13987	3.28659	3.43124	1.05106		O			O
NM_003943	STBD1	chr4:77135192-77232283	1.55186	1.61711	2.60623	2.66456	2.33318	2.39795	1.05091			O		O			O
NM_003350	UBE2V2	chr8:48920994-48974454	6.0885	6.13916	7.18288	7.14655	6.92138	7.0632	1.05089			O				O	O
NM_002226	JAG2	chr14:105607317-105635161	1.62716	1.49289	2.59585	2.62566	2.47358	2.16402	1.05073
NM_024108	TRAPPC6A	chr19:45666185-45681485	3.73352	3.84725	4.79909	4.88219	5.07514	5.02715	1.05026
NM_001198868	CAPN1	chr11:64948685-64979477	1.15761	0.770423	1.91815	2.10748	1.08324	1.25415	1.0488		O			O
NM_001193538	TMEM126B	chr11:85339616-85347583	4.43408	4.39685	5.5091	5.41751	5.1134	5.2814	1.04784					O
NM_021140	KDM6A	chrX:44732422-44971845	2.15891	2.17801	3.21083	3.22096	3.29383	3.31707	1.04743		O	O	O	O			O
NM_000849	GSTM3	chr1:110276553-110283660	1.42853	1.52223	2.60332	2.44104	3.70098	3.83621	1.0468		O			O
NM_002292	LAMB2	chr3:49158546-49170599	3.49839	3.49045	4.51337	4.56506	4.96859	4.8272	1.04479		O			O
NM_130445	COL18A1	chr21:46825096-46933634	2.10708	2.1396	3.1016	3.23008	3.48761	3.39129	1.0425					O		O
NR_003678	NCOR1P1	chr20:26084051-26094677	0.705709	0.974388	1.9171	1.84778	2.37737	2.36315	1.04239
NM_001080	ALDH5A1	chr6:24495196-24537435	2.10296	2.27658	3.18319	3.27903	3.2174	3.24096	1.04134		O			O
NM_007034	DNAJB4	chr1:78470635-78482995	3.30883	3.38511	4.41631	4.36018	4.22814	4.35234	1.04127	O					O
NM_007129	ZIC2	chr13:100634025-100639019	1.01025	1.27285	2.1018	2.26363	1.48872	1.77636	1.04117					O
NM_003662	PIR	chrX:15363712-15511711	0.272672	0.223033	1.1134	1.46162	1.39973	2.04574	1.03966
NM_006517	SLC16A2	chrX:73641327-73753764	0.310725	0.428435	1.39306	1.42423	1.08684	1.1169	1.03907			O		O
NM_198240	CLIP1	chr12:122755980-122907116	3.85313	3.88814	4.92363	4.89442	4.18256	4.17201	1.03839
NM_001010938	TNK2	chr3:195590235-195635880	0.000138769	0.352422	0.852561	1.57412	1.23898	1.32162	1.03706			O		O			O
NM_016403	CWC15	chr11:94695786-94706776	4.84364	4.87444	5.88474	5.9058	5.81074	6.07087	1.03623	O				O		O
NR_024373	LOC541471	chr2:112124590-112252692	4.83368	4.80621	5.83875	5.87163	5.96831	6.07164	1.03525
NR_003578	ZNF702P	chr19:53471503-53496784	1.0603	1.13584	2.10549	2.16061	2.45202	2.53142	1.03498					O
NR_003013	SCARNA16	chr17:75084724-75213181	3.14845	3.38032	3.70706	4.88842	3.70531	3.11119	1.03336
NM_006307	SRPX	chrX:38008587-38080177	0.419346	5.36737e-05	1.2528	1.23174	1.81599	1.42801	1.03257
NM_001198805	MSANTD3	chr9:103189494-103339918	2.89398	2.80545	4.06365	3.70028	3.6924	3.74653	1.03225						O	O	O
NM_007047	BTN3A2	chr6:26365397-26378548	1.37132	1.29555	2.37423	2.35651	2.2356	2.53033	1.03194				O
NM_013381	TRHDE	chr12:72647286-73059422	0.1336	0.149708	1.18816	1.15842	1.01443	1.06457	1.03164			O		O			O
NM_175058	PLEKHA7	chr11:16809206-17035963	3.14086	3.13479	4.1383	4.20022	4.45452	4.42802	1.03144				O			O	O
NM_182646	CPEB2	chr4:15004297-15071777	0.944328	0.703064	1.70051	2.00955	1.85002	1.77736	1.03133			O		O		O	O
NM_007283	MGLL	chr3:127407904-127542093	3.23843	3.16479	4.11387	4.3517	3.79484	3.96606	1.03118			O	O			O	O
NM_001099672	C8orf59	chr8:86089618-86132643	3.604	3.78827	4.74788	4.70175	5.18778	5.3126	1.02868					O
NM_001170564	HHAT	chr1:210501595-210849638	0.439525	0	1.10965	1.38504	1.60819	1.75413	1.02758			O		O		O	O
NM_002800	PSMB9	chr6:32821937-32827628	2.8216	2.69404	3.76958	3.80062	3.9186	3.81833	1.02728					O
NM_000287	PEX6	chr6:42928499-42946981	1.74119	1.73714	2.72315	2.80817	2.65823	2.63802	1.0265		O			O
NM_207380	C15orf52	chr15:40623652-40633168	2.0446	1.98549	3.07962	3.00247	3.10515	2.94039	1.026
NM_201554	DGKA	chr12:56324945-56347807	1.30532	1.1735	2.29412	2.2346	2.53212	2.44278	1.02495						O
NM_133646	ZAK	chr2:173940564-174146764	2.45685	2.54704	3.53156	3.5217	3.2821	3.23845	1.02468			O		O		O	O
NM_018903	PCDHA12	chr5:140165875-140391929	2.59725	2.46197	3.59058	3.51782	3.54572	3.56652	1.02459						O
NM_001256399	ELOVL1	chr1:43829067-43833745	3.58174	3.56741	4.60321	4.59473	4.25755	4.30542	1.0244		O
NM_203473	PORCN	chrX:48367370-48379202	0.367402	0.468787	1.38248	1.49959	1.59277	1.13671	1.02294				O			O
NM_002461	MVD	chr16:88718347-88729495	3.39568	3.41239	4.42555	4.4273	4.19853	4.1486	1.02239					O
NR_046242	LOC100505865	chr16:66442426-66444803	0.813213	1.11563	1.89063	2.08177	2.56369	2.59914	1.02178
NM_001166345	MDFIC	chr7:114562208-114659970	2.00277	2.11791	3.0826	3.08033	2.89128	2.81377	1.02112		O	O		O		O	O
NM_024873	TNIP3	chr4:122052563-122148621	1.41688	1.43861	2.4975	2.40013	1.12977	1.39609	1.02107	O			O		O		O
NM_005110	GFPT2	chr5:179727699-179780315	2.2965	2.3275	3.37174	3.29063	2.07874	2.14858	1.01919					O		O
NM_017693	BIVM	chr13:103436630-103528351	1.86288	1.84117	2.87886	2.86352	3.11021	3.16777	1.01917					O
NM_003043	SLC6A6	chr3:14444105-14583588	4.88616	4.88311	5.91713	5.88894	5.77656	5.71231	1.0184				O				O
NM_015236	LPHN3	chr4:62362838-62938168	0.338902	0.390219	1.44049	1.32501	1.33328	1.32277	1.01819			O	O			O	O
NM_001145543	ZSCAN18	chr19:58595208-58629793	2.18387	2.35028	3.19697	3.3713	3.9034	3.70001	1.01706		O			O		O
NM_030952	NUAK2	chr1:205271190-205290883	2.91506	2.80666	3.83926	3.91655	3.8942	4.04765	1.01705			O
NM_023073	C5orf42	chr5:37106329-37249530	1.14156	1.2277	2.24974	2.15322	2.31815	2.44292	1.01685		O	O		O		O	O
NM_002957	RXRA	chr9:137218315-137332431	4.16911	4.15054	5.14467	5.20805	4.28888	4.23992	1.01654		O		O	O		O
NM_016332	MSRB1	chr16:1988233-1993294	5.21063	5.27048	6.23737	6.27681	5.87373	5.88635	1.01653		O
NM_198436	AURKA	chr20:54944444-54967351	3.59139	3.49897	4.53511	4.58683	3.31654	3.62703	1.01579
NM_004415	DSP	chr6:7541869-7586946	2.64256	2.66924	3.70988	3.63141	3.72598	3.77726	1.01474				O	O			O
NM_032102	SRSF8	chr11:94800055-94804388	3.07126	3.05586	4.05863	4.0978	4.06403	4.05321	1.01466	O				O
NM_001172705	EIF4G2	chr11:10818592-10830582	0.999476	0.605288	2.12649	1.50752	1.61089	0.696403	1.01462		O
NM_000655	SELL	chr1:169659805-169680843	1.01384	1.01989	2.02466	2.03806	1.28963	1.51049	1.0145							O	O
NM_138426	GLCCI1	chr7:8008373-8128709	1.87975	1.86443	2.90703	2.86458	2.75991	2.81991	1.01371			O					O
NM_018370	DRAM1	chr12:102271104-102317401	2.73455	2.61407	3.71157	3.66422	3.2754	3.33451	1.01359		O	O		O			O
NM_003909	CPNE3	chr8:87526655-87573726	4.48506	4.42846	5.46072	5.47929	5.35292	5.40746	1.01324			O		O		O	O
NM_032876	AJUBA	chr14:23440409-23451848	5.6794	5.71816	6.69043	6.73357	6.42154	6.24671	1.01322
NM_145182	PYCARD	chr16:31212806-31214097	0.251063	0.430402	1.28069	1.42448	0	0.262794	1.01185
NM_052937	PCMTD1	chr8:52730139-52811735	3.20068	3.1146	4.15957	4.17937	3.97073	3.9026	1.01183			O		O		O	O
NM_006059	LAMC3	chr9:133884503-133968446	0.0264933	0.0799017	1.0426	1.08496	1.21145	1.25469	1.01058			O
NM_152296	ATP1A3	chr19:42470733-42498428	0.660752	1.16325	1.93153	1.91292	3.21539	3.22041	1.01022					O
NM_003923	FOXH1	chr8:145691737-145701718	1.13049	1.13503	2.21066	2.07455	2.24245	1.99563	1.00985		O			O		O
NM_001400	S1PR1	chr1:101702304-101707076	0.231875	0.319543	1.36959	1.19959	2.32308	2.30283	1.00888					O			O
NM_001163508	DCAF4	chr14:73393039-73426357	0.263046	0.506605	1.23375	1.55193	1.6462	1.6973	1.00801				O			O
NM_016538	SIRT7	chr17:79869814-79876058	3.2675	3.20516	4.2082	4.27867	4.50041	4.48485	1.0071
NM_015485	RWDD3	chr1:95558072-95712781	1.87663	2.26116	3.04699	3.10381	2.75534	3.06947	1.0065		O		O	O			O
NM_032310	C9orf89	chr9:95858449-95875565	4.13499	4.27181	5.24506	5.1741	5.30534	5.264	1.00618			O
NM_001193397	PPP2R4	chr9:131873227-131911225	1.01645	0	1.89348	1.13223	1.20705	2.0344	1.00463			O
NM_139276	STAT3	chr17:40465342-40540513	3.32771	3.41287	4.36878	4.37748	4.09519	4.12176	1.00284		O					O
NM_153698	AAED1	chr9:99403532-99417599	2.45301	2.4298	3.45494	3.42822	3.56765	3.47875	1.00018					O		O
NM_032357	CCDC115	chr2:131095815-131099922	3.04055	3.15628	4.0535	4.1433	3.87728	4.01008	0.999989					O		O
NM_001264	CDSN	chr6:31082607-31107869	0.126452	0.119215	1.10272	1.13534	1.39095	1.19144	0.996198			O
NM_145176	SLC2A12	chr6:134308718-134373789	1.91309	1.98156	2.95034	2.93646	2.94936	2.95883	0.996074		O		O		O	O	O
NM_001797	CDH11	chr16:64980682-65155919	1.44547	1.61982	2.6261	2.43127	2.33946	2.52652	0.996041				O	O		O	O
NM_018988	GFOD1	chr6:13363586-13487869	0.141239	0.0673296	1.12013	1.07976	1.58648	1.12503	0.995657	O		O		O	O	O	O
NM_080821	FAM210B	chr20:54933982-54943718	2.63502	2.70444	3.59371	3.73516	4.10633	4.12472	0.994711					O			O
NM_001617	ADD2	chr2:70889215-70995375	0.552342	0.590561	1.58128	1.55081	2.4617	2.4353	0.994592					O		O
NM_173595	ANKRD52	chr12:56623819-56652143	3.22334	3.26173	4.28627	4.18762	4.27056	4.0942	0.994404			O		O
NM_020400	LPAR5	chr12:6728000-6745297	0.915855	0.774584	1.77879	1.89999	2.13941	2.10471	0.994171					O		O
NM_022152	TMBIM1	chr2:219135114-219211516	5.16251	5.08162	6.10395	6.12796	6.31839	6.3971	0.993891		O	O
NM_003564	TAGLN2	chr1:159887902-159895284	8.70803	8.65625	9.63845	9.71306	9.28648	9.37625	0.99362
NM_002688	42252	chr22:19701986-19712297	2.03847	1.82098	2.8618	2.98253	3.28218	3.25617	0.992435
NM_001943	DSG2	chr18:29078026-29136874	6.01417	6.02666	7.02081	7.00483	6.71519	6.69559	0.992405						O		O
NM_004973	JARID2	chr6:15246205-15522273	3.00225	3.00954	4.00867	3.98581	3.8978	3.91224	0.991344			O	O	O		O	O
NM_012326	MAPRE3	chr2:27193524-27250087	2.6027	2.49258	3.53782	3.53994	4.59137	4.51629	0.991237			O				O
NM_020831	MKL1	chr22:40766594-41032690	3.05562	2.92434	3.99292	3.96766	4.24906	4.16799	0.99031		O	O	O	O		O	O
NM_006148	LASP1	chr17:37026111-37078023	5.78656	5.80158	6.75352	6.81464	6.57516	6.57405	0.990012							O
NM_015726	DCAF8	chr1:160185504-160232350	2.1523	1.98823	2.95958	3.15842	2.97785	2.87649	0.98873		O
NM_001195032	C6orf99	chr6:159309618-159331385	0.736794	1.14671	1.69723	2.16304	2.67512	2.97465	0.988378				O	O			O
NM_015601	HERC4	chr10:69681655-69835103	3.14818	3.11568	4.11621	4.12396	4.09136	4.19053	0.988152			O		O			O
NM_145662	SPANXA2	chrX:140590842-140738069	0.403234	0.384702	1.62666	1.1365	2.19532	2.66297	0.987611	O					O
NM_138361	LRSAM1	chr9:130213764-130265780	0.960603	0.701111	1.85535	1.78027	1.83525	2.02554	0.986953
NM_016032	ZDHHC9	chrX:128937263-128977910	3.83354	3.84341	4.80281	4.8477	5.03551	5.09484	0.98678	O	O	O			O
NM_004428	EFNA1	chr1:155100348-155107386	5.24396	5.27337	6.25525	6.23432	4.96496	5.16767	0.986119
NM_018010	IFT57	chr3:107879658-107941417	2.44999	2.52152	3.43167	3.51152	3.63888	3.63262	0.985841		O
NM_005228	EGFR	chr7:55086724-55275031	3.92344	3.96496	4.94748	4.91199	5.1113	5.1186	0.985536		O	O		O		O	O
NM_173552	C3orf58	chr3:143690639-143711210	1.57451	1.7014	2.44786	2.79836	2.48439	1.8487	0.985156			O	O	O	O		O
NM_018956	C9orf9	chr9:135754289-135765418	0.641632	0.656096	1.47821	1.78912	2.00556	1.92987	0.984799
NR_027167	C17orf76-AS1	chr17:16342300-16395505	3.24642	3.40741	4.1412	4.48169	2.85273	4.09519	0.984532
NM_015463	CNRIP1	chr2:68511302-68547183	0.543502	0.661698	1.61242	1.56119	1.57176	1.53892	0.984207							O
NM_025155	PAAF1	chr11:73583712-73638781	3.1725	3.22325	4.20077	4.16281	4.04806	4.06397	0.983916			O				O
NM_015210	SOGA2	chr18:8717368-8832775	1.18847	1.21287	2.1506	2.21533	2.38831	2.33213	0.982291
NM_005109	OXSR1	chr3:38207025-38296979	3.89785	3.9348	4.89947	4.89753	5.1479	5.19055	0.982173			O				O	O
NM_021732	AVPI1	chr10:99437180-99447015	2.88381	2.87954	3.80449	3.92321	5.4362	5.49257	0.982173		O						O
NM_016441	CRIM1	chr2:36583369-36778278	3.91914	3.96837	4.9102	4.94116	5.48989	5.35476	0.981926		O	O	O	O		O	O
NM_001178080	STAT6	chr12:57482676-57505196	0.679925	0.621178	1.30324	1.96069	1.52329	1.25818	0.981413		O		O			O
NM_001197109	SCHIP1	chr3:158787040-159615155	1.55061	1.81658	2.47828	2.84723	2.87163	2.97862	0.979165			O	O		O	O	O
NM_001109891	MAPK3	chr16:30125425-30134630	0.451032	0.970123	1.69243	1.68472	1.29761	1.12861	0.977996		O		O	O
NM_001193517	CHMP3	chr2:86730552-87005164	2.8796	2.9651	3.91097	3.88706	3.23689	3.50336	0.976664		O	O	O
NM_005984	SLC25A1	chr22:19163087-19166338	3.71881	3.54633	4.55241	4.66506	4.36079	3.95061	0.976167		O	O		O
NM_013372	GREM1	chr15:33010204-33026870	2.75823	2.55853	3.62757	3.64135	4.46708	4.22342	0.976079				O			O
NM_006459	ERLIN1	chr10:101909846-101945814	0.996037	0.718557	1.78886	1.87441	1.51954	1.53422	0.974337			O				O	O
NM_001163423	ZNF580	chr19:56152391-56154836	0.000370269	0	0.0022015	1.94588	0	1.98581	0.973858		O
NM_020338	ZMIZ1	chr10:80828791-81076285	2.5351	2.64184	3.54462	3.57732	3.10604	3.04312	0.972496					O		O
NM_006060	IKZF1	chr7:50344377-50472798	0.608275	0.0453332	1.47741	1.11762	0.8545	0.971355	0.970711			O		O		O
NM_014400	LYPD3	chr19:43964945-43969831	2.52732	2.42717	3.3135	3.58221	4.29355	4.33405	0.970609				O			O
NM_017935	BANK1	chr4:102711763-102995969	0.603068	0.949699	1.69227	1.80163	1.4333	1.67683	0.970565			O	O		O	O	O
NM_016546	C1RL	chr12:7247145-7274447	2.71617	2.61454	3.6287	3.64276	3.03387	2.90062	0.970376							O
NM_004120	GBP2	chr1:89573309-89591799	2.77667	2.96196	3.84887	3.82997	3.86213	3.91715	0.970103						O
NM_030965	ST6GALNAC5	chr1:77333185-77529737	0.256383	0.258947	1.13174	1.32122	1.29131	1.10759	0.968815			O	O			O
NM_013314	BLNK	chr10:97951454-98031333	0	0.000314945	1.05367	0.880296	1.21162	1.33878	0.966824			O			O		O
NM_001163922	VSIG10L	chr19:51834794-51845378	0.751365	0.726977	1.64345	1.76787	2.12653	2.14408	0.966487					O		O
NM_001174066	FGFR1	chr8:38268655-38326352	0.637698	0.338369	1.37656	1.53143	1.23936	1.6063	0.965962					O		O
NM_001130071	EPN1	chr19:56186560-56207133	1.07282	1.30496	2.17125	2.13845	1.61192	1.62529	0.965961		O					O
NM_001031800	TIPRL	chr1:168148170-168171351	3.03279	2.63947	3.79626	3.80745	3.95333	3.98442	0.965723							O
NM_139045	SMARCA2	chr9:2015341-2193623	1.72626	1.71006	2.69975	2.66741	2.40702	2.40763	0.965415					O		O
NM_003329	TXN	chr9:113006091-113018920	9.32604	9.48886	10.3707	10.3747	10.4396	10.5244	0.965276				O			O
NM_001170650	LAS1L	chrX:64732461-64754686	0.14638	0	0.682298	1.393	1.35626	0.744839	0.964461					O
NM_001001389	CD44	chr11:35160416-35253949	3.35045	3.21901	4.28035	4.21753	4.91217	4.90693	0.964207				O			O	O
NM_004344	CETN2	chrX:151995870-151999301	5.62618	5.56938	6.56325	6.56068	6.50504	6.67013	0.964179
NM_004929	CALB1	chr8:91070837-91095107	0.0457516	0.0714977	1.0482	0.996189	1.04336	1.14163	0.963571			O					O
NM_003242	TGFBR2	chr3:30647993-30735633	3.37565	3.43841	4.25388	4.48651	5.08277	4.95255	0.963165			O	O	O		O	O
NM_206866	BACH1	chr21:30671219-30734217	0.930953	1.08014	2.24984	1.6859	1.41992	1.685	0.962326			O	O				O
NM_001143965	TBC1D7	chr6:13305183-13328787	2.00078	1.88538	2.70662	3.10361	3.64222	3.91322	0.962037		O
NM_001629	ALOX5AP	chr13:31287614-31338565	0.0176298	0.418557	1.20311	1.15593	0.411019	0.695221	0.961425	O			O	O	O	O
NR_024607	MGC16121	chrX:133677406-133680741	0.295207	0.330962	1.17255	1.37311	1.4626	1.35566	0.959748
NM_012194	C11orf41	chr11:33563876-33695646	0.578241	0.716509	1.64033	1.57371	1.64495	1.59203	0.959647
NM_005507	CFL1	chr11:65622284-65625804	9.58256	9.50476	10.4884	10.5173	10.3301	10.435	0.959208
NM_153717	EVC	chr4:5712923-5816031	0.705751	0.682233	1.6934	1.61269	1.67521	1.7098	0.959054			O
NM_178819	AGPAT6	chr8:41435706-41482520	3.54008	3.62846	4.50959	4.57604	4.54546	4.50526	0.958552			O		O		O
NM_080725	SRXN1	chr20:627267-633890	5.83604	5.83333	6.73662	6.8488	7.58477	7.64121	0.958026			O					O
NM_015041	CLUAP1	chr16:3550962-3587669	2.73658	2.82297	3.6891	3.78555	4.04215	4.12751	0.957549			O	O			O	O
NM_014234	HSD17B8	chr6:33172418-33174607	2.42106	2.33029	3.26375	3.40106	3.68938	3.59972	0.956734
NM_001130691	PPP3CA	chr4:101944586-102268628	3.70417	3.67421	4.63196	4.65821	4.45689	4.44197	0.955892				O				O
NM_017751	SMPD4	chr2:130908964-130948300	1.63379	1.33271	2.56816	2.30947	2.06943	2.55107	0.955567		O
NM_003514	HIST1H2AM	chr6:27860476-27860963	1.85469	1.94047	2.5226	3.18267	2.70882	2.91807	0.955054		O
NM_053026	MYLK	chr3:123304402-123603149	0.0694837	0.0265616	1.09532	0.910269	0.832449	0.947653	0.954774			O				O	O
NM_001135917	DOLPP1	chr9:131843382-131852717	2.3417	2.39781	3.32238	3.32658	2.90941	2.90176	0.954724		O			O
NM_001064	TKT	chr3:53258722-53290130	8.42753	8.42829	9.36148	9.40361	9.12251	9.11169	0.954636			O		O		O	O
NM_001757	CBR1	chr21:37441939-37498938	4.81412	4.85089	5.74825	5.82577	6.42161	6.33662	0.954496			O		O			O
NM_004508	IDI1	chr10:1064846-1095061	5.23744	5.31643	6.2244	6.23839	5.87417	5.97853	0.954463		O
NM_001128615	ARHGEF3	chr3:56761445-57113336	2.49303	2.26589	3.32433	3.34024	2.99666	2.99149	0.952826		O		O	O		O	O
NM_024537	CARS2	chr13:111293756-111358480	3.42767	3.56192	4.45493	4.43994	4.22783	4.22334	0.952639	O				O
NM_018083	ZNF358	chr19:7581003-7585911	2.11376	2.11145	3.00061	3.12956	3.0359	3.08386	0.952489
NM_001042463	TMEM80	chr11:644224-704129	1.21112	1.23785	2.27028	2.08226	2.23935	2.09249	0.951789		O
NM_057159	LPAR1	chr9:113636053-113800365	2.89767	3.10963	4.0387	3.87195	3.06862	3.12467	0.951679		O	O	O	O			O
NM_203389	RNH1	chr11:494511-507283	3.99531	4.04308	4.98638	4.9548	3.75143	3.94642	0.95139		O		O
NM_138319	PCSK6	chr15:101844132-102030187	1.32028	1.01849	2.07994	2.16032	1.95018	2.05665	0.950742				O	O		O
NM_015012	TMEM41B	chr11:9302200-9336315	4.90965	4.91841	5.88823	5.84089	5.78639	5.66897	0.950525		O		O				O
NM_001008660	PICALM	chr11:85668213-85780923	5.06013	4.9855	5.96871	5.97798	6.34008	6.43204	0.950524			O				O	O
NM_001193635	DHRS4L2	chr14:24439082-24475617	1.18795	0.0395134	1.9	1.22721	0.714063	0.866709	0.949876
NR_023358	SCARNA9L	chrX:20142635-20159966	0.457389	0.228064	1.3546	1.22999	1.0308	1.41888	0.949567
NM_000901	NR3C2	chr4:148999914-149363672	0.310198	0.31995	1.31125	1.21646	1.6448	1.27525	0.948783			O	O	O		O	O
NM_018833	TAP2	chr6:32789609-32806547	3.34599	3.2561	4.26782	4.2312	4.13963	3.74713	0.948463		O			O
NR_037716	RNASEK	chr17:6915735-6922973	3.39074	3.52002	4.25689	4.54595	4.72709	5.0551	0.946042
NM_014164	FXYD5	chr19:35645624-35660788	4.4201	4.4136	5.32657	5.39614	5.48234	5.64935	0.944505			O		O		O
NM_024010	MTRR	chr5:7869216-7901235	1.72879	1.86286	2.84643	2.6334	2.76363	2.43351	0.94409		O			O		O
NM_012151	F8A1	chrX:154064063-154250998	1.82217	2.14154	2.86532	2.98575	2.94901	2.57876	0.943685
NM_018181	ZNF532	chr18:56530060-56653709	1.99221	2.07508	2.97741	2.97582	2.48381	2.44708	0.942972		O	O	O	O		O	O
NM_013346	SNX12	chrX:70279096-70293276	3.80575	3.64577	4.63651	4.69988	4.78977	4.4986	0.942441					O
NM_007183	PKP3	chr11:394216-404908	4.57883	4.61913	5.50494	5.57768	4.48089	4.32269	0.942333		O			O
NM_198793	CD47	chr3:107761940-107809935	4.66352	4.62577	5.60042	5.57081	5.22992	5.24645	0.940968		O		O	O			O
NM_006478	GAS2L1	chr22:29702996-29708774	2.14446	1.5977	2.88376	2.74004	2.18067	2.42706	0.940822		O
NM_001166171	NEK6	chr9:127019884-127114719	1.65501	0.792077	2.29783	2.02963	0.906357	1.64225	0.940187							O
NM_175073	APTX	chr9:32972603-33001639	2.07976	1.64299	2.80425	2.79378	3.01633	2.92837	0.937642
NM_004481	GALNT2	chr1:230202955-230417875	5.71021	5.68209	6.63074	6.63372	6.80907	6.77704	0.936085		O		O	O		O
NM_001134321	FAM127B	chrX:134184962-134186221	2.75375	3.23075	3.93635	3.91899	3.83474	3.72192	0.935415					O
NM_014970	KIFAP3	chr1:169890469-170043879	2.98541	2.85779	3.8451	3.86886	4.0783	4.11533	0.93538							O
NM_005914	MCM4	chr8:48872762-48890719	0.486475	0.311436	1.39541	1.26975	0.704583	0.915805	0.933627		O	O
NM_198252	GSN	chr9:124030379-124095120	3.66517	3.67323	4.4881	4.71688	5.58377	5.61623	0.933293					O			O
NM_001143963	L1CAM	chrX:153126970-153141399	0.175439	0.154866	1.17533	1.02097	3.02757	3.07498	0.932995
NM_012309	SHANK2	chr11:70313960-70935808	1.05126	1.1164	2.04064	1.99261	1.47798	1.60207	0.932792				O			O
NM_012395	CDK14	chr7:90338711-90839904	1.82794	1.78314	2.74228	2.73378	2.93264	3.03251	0.932486					O		O	O
NM_020223	FAM20C	chr7:192968-300740	1.558	1.52048	2.47487	2.46707	1.74923	1.93138	0.931735					O		O
NM_000516	GNAS	chr20:57393972-57486250	6.70693	6.72679	7.58354	7.70945	7.48319	7.31808	0.929635		O						O
NM_001360	DHCR7	chr11:71145456-71159477	5.48308	5.49446	6.42398	6.41261	6.11785	6.13458	0.929523					O
NM_001127192	CNBP	chr3:128886657-128902810	0.524485	0.767944	1.00085	2.14808	0.881742	1.73519	0.928254		O			O		O
NM_001136202	ISOC2	chr19:55964345-55973049	4.45149	4.4548	5.33892	5.42346	5.42648	5.4306	0.928046		O
NM_002583	PAWR	chr12:79985744-80084790	5.13223	5.08583	6.00803	6.06597	6.22865	6.20087	0.927966			O		O			O
NM_033043	CGB5	chr19:49547101-49548568	0.272734	0.213184	1.05076	1.28943	1.03151	0.883833	0.927137					O
NR_047574	LOC100507297	chr3:194304996-194354150	0.183931	0.531732	1.37091	1.19872	0.918525	1.05873	0.926982
NM_016545	IER5	chr1:181057637-181059979	5.43453	5.46614	6.33535	6.4191	6.57029	6.51292	0.926888			O		O	O	O	O
NM_001134338	RNF24	chr20:3912068-3996216	2.24724	2.09787	3.01562	3.18304	2.98005	2.98158	0.926775				O	O		O	O
NM_006765	TUSC3	chr8:15397595-15624158	2.91011	2.93339	3.93304	3.76285	3.91061	4.21703	0.926199			O		O		O	O
NR_038456	NAPA	chr19:47987538-48018515	1.59274	1.67071	2.44689	2.66756	3.1147	2.95764	0.925504					O
NM_003062	SLIT3	chr5:168093070-168728133	0.0472407	0.0323926	0.904162	1.02332	1.50991	1.32542	0.923924					O		O
NM_001243771	APH1A	chr1:150237798-150241609	3.28004	3.38822	4.18223	4.3334	3.83682	3.83331	0.923687		O
NM_001032280	TFAP2A	chr6:10396915-10419797	2.76494	2.7072	3.69314	3.62452	3.61457	3.45834	0.922761	O					O	O
NM_006483	DYRK1B	chr19:40315989-40324841	0.785101	0.441616	1.42958	1.64137	1.29727	1.85626	0.922116					O
NM_001242836	NDRG4	chr16:58497548-58547523	1.84691	1.67781	2.64498	2.7234	3.23532	3.34984	0.921835			O		O		O
NM_015469	NIPSNAP3A	chr9:107509968-107522403	3.58781	3.4822	4.43016	4.48342	4.13499	4.25545	0.921781		O					O
NM_004483	GCSH	chr16:81115551-81129980	3.50915	3.47769	4.41987	4.40968	4.40567	4.58211	0.921355
NM_004815	ARHGAP29	chr1:94634462-94703307	2.1618	2.06355	3.04009	3.02707	3.37833	3.47633	0.9209			O	O	O		O	O
NM_019118	TMEM234	chr1:32681797-32687926	1.95912	1.80491	2.69867	2.90682	2.77576	2.59016	0.920729
NR_036488	LOC100499467	chr17:70399462-70588943	4.52407	4.57742	5.47281	5.46965	4.64352	4.64843	0.920489
NM_003149	STAC	chr3:36422096-36589496	0.882744	1.02074	1.89615	1.84829	2.10503	2.1206	0.920476			O	O			O	O
NM_032788	ZNF514	chr2:95813399-95825263	1.32087	1.23063	2.26763	2.12463	2.38834	2.31828	0.920381					O
NM_007031	HSF2BP	chr21:44949071-45079374	0.933464	0.914188	1.87902	1.80843	1.74345	2.02988	0.919901		O					O
NM_014331	SLC7A11	chr4:138948576-139163503	6.03992	6.01628	6.9783	6.91763	6.7638	6.6708	0.919864						O	O	O
NM_001130438	SPTAN1	chr9:131314836-131419129	1.66107	1.54737	2.35536	2.69243	2.55523	2.58758	0.919673		O	O		O
NM_003851	CREG1	chr1:167510250-167523056	4.5729	4.58309	5.46682	5.52464	5.62748	5.77694	0.917732					O
NM_174929	ZMIZ2	chr7:44788529-44809479	3.30044	3.20696	4.12002	4.22202	4.40219	4.13709	0.917323		O	O		O		O	O
NM_018473	ACOT13	chr6:24667262-24719403	3.08134	3.14403	4.0268	4.03281	4.58595	4.69898	0.917121
NM_080876	DUSP19	chr2:183943286-183964722	0.373045	0.286056	1.21818	1.27486	0.978748	1.31028	0.916972			O					O
NM_001193552	ZNF850	chr19:37234379-37263716	1.34249	1.52919	2.46136	2.24413	2.24066	2.08426	0.916903					O
NM_002944	ROS1	chr6:117609529-117747018	0.257363	0.296829	1.24138	1.14618	2.47492	2.51647	0.916685								O
NM_022157	RRAGC	chr1:39305014-39325340	3.19778	3.16365	4.07385	4.12092	4.15073	4.25623	0.91667				O	O		O
NR_003015	SNORA53	chr12:98987402-98995778	1.66267	0.875995	1.52081	2.85103	1.16672	1.84913	0.916586
NM_007118	TRIO	chr5:14143828-14509458	5.20011	5.36715	6.22883	6.16955	6.36365	6.36507	0.915559			O					O
NM_201277	CNN2	chr19:1026297-1039064	2.3907	1.84937	2.96841	3.10275	2.84165	3.35358	0.915546		O			O
NM_001126339	THTPA	chr14:23980968-24048009	0.98203	1.19131	2.11016	1.89362	1.82844	1.41917	0.915219		O			O
NR_028415	LOC100292680	chr12:1609656-1613590	0.295174	0.23681	1.17035	1.19165	1.31846	1.17398	0.915008
NM_001001788	RAET1G	chr6:150139893-150244214	0.306723	0.587784	1.30601	1.41827	1.49492	1.54022	0.914885				O	O
NR_038279	LOC100506930	chr19:36803962-36822620	3.52418	3.55222	4.4551	4.45072	4.40272	4.25942	0.914713
NM_001130415	APOLD1	chr12:12878850-12944399	1.33717	1.41703	2.23202	2.35104	1.71107	1.64094	0.914427		O				O
NM_175610	TJP1	chr15:29992356-30114706	4.18708	4.18824	5.14811	5.05604	5.09542	5.16557	0.914414			O	O		O		O
NM_024626	VTCN1	chr1:117686208-117753582	0.117682	0.188763	0.909437	1.22531	0.721912	0.793633	0.914152				O				O
NM_001256487	GOLGB1	chr3:121382045-121468614	0.294059	0.497591	1.60669	1.01324	1.45148	1.09108	0.914142		O	O				O	O
NM_014000	VCL	chr10:75757871-75879914	0.673843	0.718647	1.47238	1.74819	1.30053	1.38454	0.91404			O				O	O
NM_001078645	CDC16	chr13:115000361-115038150	4.52923	4.2854	5.32854	5.31411	5.03888	5.21423	0.914008					O		O
NM_002485	NBN	chr8:90945563-90996899	3.56909	3.55197	4.51939	4.42636	4.25217	4.2597	0.912344		O			O			O
NM_032345	WIBG	chr12:56295196-56321697	2.72244	2.76731	3.71168	3.60206	3.81969	3.34585	0.911999			O		O
NM_017705	PAQR5	chr15:69591293-69699976	0.428385	0.466479	1.32603	1.39242	1.94851	2.09413	0.911789			O		O		O
NM_000958	PTGER4	chr5:40680031-40693837	1.054	1.10332	1.94256	2.0379	1.7462	1.75617	0.911565			O	O	O	O	O	O
NM_001130040	SHC1	chr1:154934773-154946959	2.84836	2.72247	3.90394	3.48976	4.09796	3.98205	0.911434
NR_049793	LOC100130476	chr6:138144806-138204449	0.262868	0.167236	1.13671	1.11619	1.01988	1.17981	0.911399				O				O
NM_001065	TNFRSF1A	chr12:6437922-6451283	6.23931	6.19533	7.1355	7.12191	6.87546	6.84123	0.911387
NM_020807	ZNF319	chr16:58028572-58033762	1.6493	1.67795	2.56517	2.58407	2.49699	2.31166	0.910995		O		O				O
NM_004040	RHOB	chr2:20646834-20649201	5.81646	5.72781	6.63038	6.73379	6.91537	6.80552	0.909952				O	O		O	O
NM_001178119	ABI1	chr10:26986594-27150016	0.29252	0.127727	1.47393	0.765402	1.62744	1.30829	0.909544		O				O		O
NM_001039490	CD151	chr11:832951-838835	3.28147	3.05443	4.39472	3.75943	3.95246	3.87377	0.909127
NM_001003810	HNRNPD	chr4:83274466-83295149	2.59674	4.57989	5.02371	3.96901	5.02928	3.57738	0.908045		O	O	O			O	O
NM_016053	CCDC53	chr12:102406716-102455899	3.52917	3.64308	4.42101	4.56552	4.65263	4.80829	0.907139		O	O					O
NM_001607	ACAA1	chr3:38080695-38178733	4.01185	4.08206	4.92761	4.97998	5.22421	5.19489	0.906837				O
NM_001256550	MPP5	chr14:67708011-67802778	2.09565	2.04268	2.96996	2.97907	2.72765	2.88425	0.905352		O			O	O	O
NM_001259	CDK6	chr7:92234234-92465941	1.17804	0.00482827	1.69029	1.3032	1.312	0.00527175	0.90531			O			O		O
NR_000005	SNORD15A	chr11:75110534-75133345	0	2.66047	1.80238	2.66826	2.65653	0	0.905083
NM_001113363	TBC1D14	chr4:6911170-7059677	0.903337	0.809787	1.70268	1.81986	1.75514	1.61054	0.90471			O	O	O			O
NM_138385	TMEM129	chr4:1717678-1723084	1.18708	1.20815	1.82237	2.38085	2.03616	1.2778	0.903992					O
NM_001129995	KCTD15	chr19:34287750-34306666	1.08128	1.10115	1.69848	2.29159	0.00451176	1.29687	0.903819					O		O
NR_038269	LOC100506844	chr12:58325231-58329947	1.80939	1.71148	2.67499	2.65339	3.34441	3.34701	0.903755				O	O		O
NM_182789	PAIP1	chr5:43526369-43557521	3.41356	3.30824	4.13963	4.38824	3.7976	3.40157	0.903034		O			O
NM_003222	TFAP2C	chr20:55204357-55214338	3.23307	3.29357	4.12991	4.20062	3.93895	3.89389	0.901946		O	O	O	O		O
NM_182757	RNF144B	chr6:18387580-18469105	2.56969	2.64507	3.44704	3.57131	3.02941	3.03855	0.901794			O	O				O
NM_004268	MED17	chr11:93517404-93546496	3.8929	3.83722	4.76232	4.77128	4.5121	4.63412	0.901741
NM_145235	FANK1	chr10:127585107-127698161	0.992662	0.973508	1.86837	1.90048	2.02447	1.98994	0.90134							O	O
NM_004257	TGFBRAP1	chr2:105883539-105946148	1.41911	1.34987	2.15743	2.41241	2.3078	1.79232	0.900425		O
NR_026580	TFDP1	chr13:114239002-114295788	3.7971	3.66125	4.59328	4.6645	4.02721	4.14387	0.899719					O
NM_177454	FAM171B	chr2:187558788-187628512	1.13575	1.12907	2.04882	2.01515	2.82958	2.93389	0.899578			O		O			O
NM_001080436	WTIP	chr19:34972879-34992085	1.14683	1.30421	2.03015	2.21716	2.10482	2.03479	0.898135				O	O		O	O
NM_152496	MANEAL	chr1:38259773-38267278	0.000796364	0.381431	1.02443	1.1529	0.537397	0.478646	0.897552					O
NM_020453	ATP10D	chr4:47487409-47595503	1.43958	1.49971	2.36889	2.3646	2.3054	2.34816	0.897103								O
NM_006521	TFE3	chrX:48886241-48900990	3.05446	3.03204	3.89872	3.97907	3.82833	3.82837	0.895643		O			O
NM_001014838	CUTA	chr6:33384318-33386065	3.52562	3.17121	4.12496	4.36215	4.52825	4.87115	0.895142					O
NM_004052	BNIP3	chr10:133781203-133795435	3.50991	3.45193	4.38701	4.36511	4.09877	4.08828	0.895139				O	O		O
NM_001080545	PPP1R1C	chr2:182818967-182996109	0	0.0504931	0.587081	1.25266	1.26933	1.03038	0.894623			O				O	O
NM_006832	FERMT2	chr14:53323988-53417815	3.72101	3.72235	4.6092	4.62297	4.78935	4.85205	0.894404	O		O		O		O	O
NM_148919	PSMB8	chr6:32808493-32821748	4.26661	4.13546	5.10422	5.08605	4.45905	4.47445	0.8941					O
NM_031300	MXD3	chr5:176730834-176739292	2.59545	2.73404	3.57506	3.54175	2.49004	2.26218	0.893659							O
NM_138348	FAM105B	chr5:14664782-14699842	3.32169	3.35419	4.25151	4.21124	4.06531	4.11916	0.893436
NM_014035	SNX24	chr5:122181159-122344902	3.60642	3.56243	4.48382	4.47149	4.58657	4.57136	0.893236
NM_031992	EIF4H	chr7:73588705-73611429	6.69743	6.70252	7.5512	7.63431	7.76583	7.79364	0.892783			O
NM_001166103	SPINT2	chr19:38755097-38783254	2.87025	2.74853	3.76409	3.63929	3.69167	3.43893	0.892301
NR_026790	HCG11	chr6:26521933-26527612	1.62001	1.66729	2.58327	2.48828	2.38164	2.3625	0.892126		O			O
NM_012223	MYO1B	chr2:192110106-192290115	3.85921	3.87831	4.71681	4.80435	4.44181	4.47431	0.891815		O	O	O			O	O
NM_020134	DPYSL5	chr2:27070968-27173219	0	5.89568e-05	0.882523	0.899566	1.17961	1.68094	0.891015					O
NM_000382	ALDH3A2	chr17:19552063-19580908	4.89689	5.00571	5.83389	5.85073	5.82326	5.8351	0.891008					O
NM_152478	ZNF583	chr19:56915382-56936400	1.08309	1.0676	1.88335	2.04887	2.58028	2.96697	0.890767					O
NM_001172773	ZNF548	chr19:57901217-57913919	1.71255	1.74956	2.65005	2.59294	2.66269	2.52237	0.890445
NM_001035254	FAM102A	chr9:130702860-130742812	4.15409	4.14093	5.03895	5.03645	5.2605	5.1767	0.890195		O	O	O	O
NM_139017	IL31RA	chr5:55147206-55218682	0.0534738	4.04416e-06	1.00431	0.829039	1.35543	1.56841	0.889938	O		O				O	O
NM_173582	PGM2L1	chr11:74041360-74109502	2.24506	2.2647	3.18148	3.10778	3.36383	3.34806	0.889747		O			O			O
NM_006371	CRTAP	chr3:33155449-33189265	2.69182	2.71418	3.5577	3.62395	3.64174	3.72216	0.887828		O			O
NM_001144942	RAB34	chr17:27041298-27045286	0.994937	3.37985	3.33396	2.81645	2.15565	0.74769	0.887815
NM_001256237	PGAP2	chr11:3696239-3847601	1.18631	0.00210411	1.09184	1.87198	2.0652	1.89178	0.887705		O	O		O			O
NM_002881	RALB	chr2:121010413-121052286	4.65611	4.6775	5.54243	5.56609	5.34484	5.4269	0.887459			O		O
NM_001193389	UNKL	chr16:1401899-1464705	0.42125	0.624656	1.3999	1.4206	0.798368	0.9165	0.8873		O			O		O
NM_144664	FAM76B	chr11:95502105-95522954	3.03671	3.08343	3.96	3.93373	3.61782	3.4983	0.886797			O					O
NM_023944	CYP4F12	chr19:15783827-15807984	0.0229688	0.205463	1.00797	0.992838	1.32682	1.20072	0.886189					O
NM_005962	MXI1	chr10:111967362-112047123	2.1265	1.75784	2.72892	2.9277	2.90038	3.17713	0.886138		O	O	O	O		O	O
NM_032023	RASSF4	chr10:45455218-45490172	1.58926	1.62743	2.55218	2.43636	2.25844	2.43292	0.885925				O	O
NM_002293	LAMC1	chr1:182992594-183114727	4.88254	4.87787	5.77854	5.75309	6.24409	6.26274	0.885612			O	O	O		O
NM_133265	AMOT	chrX:112018104-112084043	0.537249	0.69973	1.49188	1.51596	1.56174	1.33418	0.885435
NM_004490	GRB14	chr2:165349322-165478360	1.22534	1.13993	2.05691	2.0784	2.03285	2.18902	0.88502					O			O
NM_015600	ABHD12	chr20:25228705-25371618	1.56455	1.64225	2.5313	2.4453	2.6256	2.77275	0.884896		O		O	O	O	O
NM_001126133	TNNT1	chr19:55644160-55660606	3.74719	3.54905	4.42074	4.645	4.4451	4.67304	0.884745							O
NM_001101667	ACOX3	chr4:8368008-8442452	0.000323854	0.0116857	0.678282	1.10309	0.568781	1.17929	0.884684				O			O
NM_030641	APOL6	chr22:36044423-36064456	3.62898	3.69723	4.56408	4.53078	3.36716	3.28026	0.884322								O
NM_001078171	FAM127A	chrX:134166332-134167575	4.09018	4.08148	4.9971	4.94242	5.63499	5.59172	0.883929		O			O
NM_014316	CARHSP1	chr16:8946801-8962863	5.54377	5.57061	6.46433	6.41765	6.34655	6.28402	0.883803		O					O
NM_001130140	ERAP2	chr5:96211643-96255406	2.87732	3.01409	3.76555	3.89322	2.74356	2.58074	0.883673							O
NR_037650	ARL2-SNX15	chr11:64781584-64808044	0.000646915	0.000337146	1.7669	0.000993657	0.000862438	0.000325122	0.883455		O			O
NM_005268	GJB5	chr1:35220720-35224112	0.476758	0.500135	1.2993	1.44397	1.21833	1.22646	0.883186				O			O
NM_016424	LUC7L3	chr17:48796925-48830072	3.14147	2.93505	4.20814	3.63467	4.02013	3.46475	0.883146
NM_139317	BIRC7	chr20:61867275-61871854	0.224566	0.166299	1.18885	0.966363	0.478355	0.344404	0.882174				O
NM_004361	CDH7	chr18:63417487-63548175	0.463922	0.476784	1.3426	1.36217	1.33864	1.3469	0.882034			O	O	O			O
NM_001145115	PPP1R3G	chr6:5085719-5087455	0.21417	0.30462	1.01268	1.27007	0.673306	0.584104	0.881981			O
NM_212550	BLOC1S3	chr19:45682002-45685058	1.72742	1.66291	2.64383	2.51003	2.83793	2.645	0.881762					O
NM_024116	TAF1D	chr11:93469095-93474703	5.00101	4.91583	5.89977	5.77996	5.56949	5.62972	0.881445						O
NR_033385	KLHDC9	chr1:161068150-161070138	0.999846	1.06432	1.86654	1.95817	1.95937	2.11262	0.880273		O		O	O
NR_027447	LOC100289341	chr9:139979397-139981269	0.629637	0.631481	1.40361	1.61732	1.73553	1.63556	0.879902
NM_006615	CAPN9	chr1:230883129-230937749	0.396802	0.522334	1.34897	1.32927	0.649284	0.692621	0.879553								O
NM_001956	EDN2	chr1:41944445-41950344	0.193606	0.0961326	0.998998	1.04915	0.99981	1.1381	0.879205				O			O
NM_001199693	SLC4A2	chr7:150755298-150773614	0.578136	0	0.941322	1.39517	0.826354	1.41886	0.879177		O
NR_033874	FLJ20021	chr4:102268933-102270040	1.15	1.05791	2.02908	1.937	2.73755	2.50012	0.879084		O	O	O	O			O
NM_181838	UBE2D2	chr5:138940750-139008018	2.53398	2.77458	3.48101	3.58554	3.24888	3.41614	0.878998		O			O
NM_021111	RECK	chr9:36036909-36124452	0.703419	0.751225	1.56792	1.64447	2.14439	2.13009	0.878873			O		O		O
NM_001037328	STAU1	chr20:47729875-47804904	1.95028	1.66295	2.58802	2.7822	2.2601	2.33513	0.878494					O		O
NM_004443	EPHB3	chr3:184279586-184300196	2.48957	2.41121	3.30382	3.3522	3.20879	3.07498	0.877626				O		O	O
NM_005808	CTDSPL	chr3:37903668-38025960	2.15181	2.40431	3.2394	3.07048	3.08591	3.29471	0.876881					O
NM_012157	FBXL2	chr3:33318933-33428757	1.12926	0.783167	1.80837	1.85726	2.43143	2.54713	0.876597				O	O		O	O
NM_020899	ZBTB4	chr17:7362684-7387568	2.62759	2.60227	3.42674	3.55627	2.28119	2.7587	0.876571		O		O
NM_016603	FAM13B	chr5:137225124-137368802	2.72859	2.755	3.66395	3.57132	3.57951	3.65378	0.875841	O	O	O		O			O
NM_147129	ALS2CL	chr3:46710484-46735194	0.946083	0.95551	1.89771	1.75482	1.756	1.68203	0.875472		O
NM_005112	WDR1	chr4:10075962-10118573	1.0662	0.901191	1.95451	1.76373	1.88178	1.86863	0.875425			O		O		O
NM_001243940	PRPSAP2	chr17:18759611-18834599	0.0717721	1.42931	1.31744	1.93375	1.40606	1.39804	0.875056							O
NM_001134395	C7orf50	chr7:1036622-1177893	1.11409	1.50377	2.0828	2.28435	1.68319	2.15242	0.874639
NM_001042412	CYLD	chr16:50775960-50835846	0.308756	0.176221	1.136	1.09636	0.406854	1.18284	0.87369					O
NM_001031701	NT5DC3	chr12:104166080-104234975	1.23841	1.24998	2.14442	2.09133	1.92871	1.88653	0.873676			O		O			O
NM_153687	IKBIP	chr12:99007181-99038829	1.3082	1.32294	2.2084	2.16989	2.67658	2.71557	0.87357							O
NM_014751	MTSS1	chr8:125563027-125740730	0.967429	1.0592	1.92377	1.8494	1.76503	1.78129	0.873268		O	O	O			O	O
NM_020848	KIAA1462	chr10:30301728-30348488	2.09302	2.32855	3.08788	3.07994	2.69564	2.65712	0.873128		O			O			O
NM_018425	PI4K2A	chr10:99400442-99436187	2.83086	2.9095	3.73658	3.74987	3.93223	3.92314	0.873041					O			O
NM_001198995	NADK	chr1:1682670-1711508	0.861819	1.14886	1.89087	1.86525	1.73398	1.52311	0.872723				O	O		O
NM_001001132	ITSN1	chr21:35014783-35261609	2.24	2.32812	3.18634	3.12643	3.32953	3.29278	0.872324					O		O	O
NM_006184	NUCB1	chr19:49403306-49426540	5.1904	5.06425	5.98592	6.01294	6.06066	6.07124	0.872103		O			O
NM_032328	EFCAB2	chr1:245133170-245288530	0.830301	0.856244	1.50681	1.9238	0.719428	0.613126	0.872034					O		O
NM_018314	UEVLD	chr11:18552949-18610293	2.33581	1.8371	3.08405	2.83291	2.40481	2.77377	0.87202					O
NR_003266	LOC220729	chr3:197340897-197354752	1.6115	1.46113	2.5024	2.31363	2.57115	2.38175	0.871702					O
NM_018279	TMEM19	chr12:72079877-72097839	3.10158	3.02924	3.93214	3.94187	3.75763	3.77859	0.871588			O	O	O
NM_001166237	GSDMD	chr8:144635556-144645231	0.687625	0.331018	1.4134	1.3475	1.19075	1.19919	0.871126		O	O		O
NM_012367	OR2B6	chr6:27925018-27925960	0.320115	0.210218	1.27175	1.00028	0.508657	0.495911	0.870848
NM_006018	HCAR3	chr12:123199302-123201439	0.194973	0.244025	1.10228	1.07794	0.667498	0.580175	0.870609
NM_000232	SGCB	chr4:52886860-52904485	2.38212	2.46267	3.25123	3.33438	3.65089	3.65086	0.870413					O
NM_007158	CSDE1	chr1:115259533-115300671	7.14799	7.15061	8.03874	8.00002	7.50136	7.5506	0.870078			O	O				O
NM_030796	VOPP1	chr7:55538305-55640200	5.41482	5.41477	6.25788	6.3112	6.41337	6.44479	0.869745	O	O	O		O		O	O
NM_015496	KIAA1429	chr8:95500004-95565746	2.74442	2.79203	3.64268	3.63313	3.46464	3.64448	0.869675	O		O					O
NM_172027	ABTB1	chr3:127391780-127399769	2.0475	2.01884	2.82965	2.97566	3.41024	3.32861	0.869489		O	O		O		O	O
NM_032186	ZNF644	chr1:91380856-91487812	0.369679	0.239116	1.13788	1.20909	0	0.174194	0.86909			O	O			O	O
NR_002989	SNORA81	chr3:186501360-186524484	1.77044	0	0	3.50595	1.65404	1.90146	0.867757
NM_198584	CA13	chr8:86157715-86196302	0.772615	0.7499	1.58892	1.668	2.07858	2.14803	0.867206		O			O			O
NM_016206	VGLL3	chr3:86987122-87040257	1.53293	1.59363	2.45863	2.40189	2.94919	2.8322	0.866981			O					O
NM_014323	PATZ1	chr22:31721789-31742249	0.778261	0.588079	1.5611	1.53897	1.37983	0.830981	0.866863				O
NM_018337	ZNF444	chr19:56652534-56672262	1.92518	3.03173	3.56186	3.12783	3.45496	3.16264	0.866392					O		O
NM_145037	NXPE3	chr3:101498028-101579869	1.58198	1.69815	2.53134	2.48059	3.03316	3.03396	0.865895		O			O
NM_018242	SLC47A1	chr17:19437166-19482346	0.564767	0.534676	1.40007	1.43105	1.36946	1.32141	0.86584			O				O
NM_006876	B3GNT1	chr11:66112842-66115161	2.76158	2.91733	3.69177	3.71864	4.16735	4.15646	0.86575					O
NM_001102371	FOXRED2	chr22:36883232-36903148	2.46594	2.54874	3.49974	3.24605	2.8531	3.2061	0.865558		O			O
NM_014042	ANAPC15	chr11:71709957-71823822	4.7117	4.76932	5.63743	5.57441	5.22435	5.28448	0.86541
NM_022748	TNS3	chr7:47314751-47621742	4.98148	5.05036	5.85741	5.90522	5.1944	5.17379	0.865399			O	O			O	O
NM_030775	WNT5B	chr12:1726221-1756378	1.16479	1.31548	1.99184	2.21819	1.85227	1.88235	0.864877							O
NM_182573	LYPD5	chr19:44300078-44324808	0.370134	0.319079	0.745046	1.67384	1.09083	1.76241	0.864835					O
NM_001145307	LRTOMT	chr11:71709957-71823822	0.581879	0.784321	1.61905	1.47667	1.1398	1.17493	0.864759
NM_006298	ZNF192	chr6:28109715-28125236	2.26391	2.25686	3.19903	3.0502	2.9461	2.98674	0.864228
NM_002964	S100A8	chr1:153362507-153363664	3.18112	3.08352	4.01404	3.9789	0.948136	1.58311	0.864151								O
NM_022128	RBKS	chr2:28004265-28561767	2.51736	2.60057	3.33672	3.50786	3.4672	3.56374	0.863326			O					O
NM_001256575	ENC1	chr5:73923230-73937249	1.43091	1.63466	2.3857	2.40615	2.61342	2.15815	0.863144
NM_182706	SCRIB	chr8:144873089-144897549	2.2305	2.97377	3.42927	3.5002	3.86939	3.70404	0.862601		O
NM_032273	TMEM126A	chr11:85358962-85367597	4.83866	4.90724	5.72798	5.74245	5.51259	5.6155	0.862265						O
NM_005717	ARPC5	chr1:183595331-183604985	6.64865	6.61879	7.47811	7.5131	7.47606	7.54032	0.861882		O	O		O		O	O
NM_020940	FAM160B1	chr10:116581502-116659586	1.77352	1.76946	2.66661	2.59978	2.31266	2.28727	0.861705			O		O			O
NM_001193531	TMEM116	chr12:112369086-112451023	0.921691	1.15369	2.0106	1.78724	2.02712	2.44557	0.861229			O					O
NM_001012643	MYPOP	chr19:46393280-46405862	1.74114	1.64204	2.45816	2.64701	2.19335	2.05983	0.860996					O
NM_032316	NICN1	chr3:49454210-49466757	1.13307	1.18903	2.06323	1.98084	2.94969	2.89756	0.860986					O		O
NM_006599	NFAT5	chr16:69599868-69738569	0.000386019	0.00336043	0.882771	0.842607	0.0625116	0.383766	0.860816					O	O		O
NM_006449	CDC42EP3	chr2:37870742-37899326	4.99534	5.02519	5.83166	5.91049	5.90199	5.93035	0.860808			O	O	O		O	O
NM_145731	SYNGR1	chr22:39745953-39781593	1.30038	1.23532	2.04786	2.2093	2.96254	2.70363	0.860729
NM_001144995	CCDC85C	chr14:99947738-100070727	3.37829	3.43703	4.24537	4.29135	4.05128	4.0022	0.8607					O
NM_016612	SLC25A37	chr8:23386362-23430063	3.93869	3.81581	4.7867	4.68684	4.22619	3.89182	0.859521			O	O	O			O
NM_001359	DECR1	chr8:91013579-91064227	4.09975	4.09519	4.86915	5.04422	5.34845	5.59543	0.859215					O
NM_014636	RALGPS1	chr9:129677052-129985445	1.02768	1.15539	1.91635	1.98393	2.18557	2.09803	0.858604			O	O	O		O	O
NM_145021	42071	chr10:45952816-46090354	0.920095	0.697887	1.77346	1.56012	1.18146	1.67099	0.857796
NR_015427	LINC00094	chr9:136890560-136933141	1.68815	1.70872	2.5313	2.58097	2.79733	2.78428	0.857698					O
NM_006382	CDRT1	chr17:15491976-15523018	0.221954	0.130293	1.17552	0.891557	0.491952	0.403737	0.857414			O					O
NM_001100598	ZNF707	chr8:144766621-144777555	1.68659	1.87377	2.65325	2.62094	2.8759	2.82003	0.85692					O
NM_019844	SLCO1B3	chr12:20963637-21069843	0.0622201	0.035716	0.938861	0.872585	1.13219	1.19845	0.856755								O
NR_028502	MIR22HG	chr17:1614797-1619566	1.66025	1.33842	2.50742	2.20361	2.31104	2.23804	0.856177
NR_036461	HIST2H2BC	chr1:149821758-149822340	1.60243	1.69517	2.4852	2.52438	2.33527	1.97131	0.855995
NM_001190796	NCK1	chr3:136581049-136667968	0.872142	0.882919	1.69376	1.77309	1.39688	1.64216	0.855896		O	O		O	O
NM_001017922	ERMAP	chr1:43272722-43310660	1.15318	1.14645	1.98593	2.02548	1.47621	1.49762	0.85589		O			O
NR_046441	MAFIP	chr4_gl000194_random:53588-115071	0.929492	0.869211	1.69658	1.81387	1.5939	1.62366	0.855876	O				O
NM_024963	FBXL18	chr7:5515427-5553399	2.60936	2.63142	3.45812	3.49402	3.82916	3.74438	0.855679
NM_033355	CASP8	chr2:202098165-202152434	2.03565	1.69838	2.58115	2.86414	2.56624	2.7054	0.85563							O
NM_001099280	HEATR7A	chr8:145202918-145316843	1.42559	1.6814	2.37192	2.44444	1.97153	2.0884	0.854686
NM_005397	PODXL	chr7:131185020-131241376	3.62814	3.6909	4.49671	4.53104	4.60879	4.56269	0.854351			O	O	O		O	O
NM_205835	LSR	chr19:35739558-35758867	4.47556	4.23376	5.2015	5.21472	5.54163	5.65279	0.85345		O
NM_031914	SYT16	chr14:62462540-62568427	0.312114	0.241858	1.14845	1.11126	1.11	1.27657	0.852866								O
NM_018262	IFT122	chr3:129158967-129239191	1.8212	1.54382	2.58244	2.48768	1.96349	2.02411	0.852549		O
NR_003035	SNORA16A	chr1:28879528-28908366	3.44132	0	0	5.14582	3.3007	0	0.852253
NM_001114614	MFGE8	chr15:89441913-89456663	2.003	2.51974	3.23482	2.99192	3.89761	3.5841	0.851999		O			O		O
NM_000216	KAL1	chrX:8496914-8700227	0.483558	0.502965	1.32383	1.36624	2.21714	2.21586	0.851772
NM_032286	MED10	chr5:6372038-6378639	5.73264	5.75859	6.55705	6.63703	6.42094	6.56222	0.851429		O			O		O
NM_004148	NINJ1	chr9:95883770-95896570	3.84741	3.82385	4.69501	4.67618	4.22612	4.17883	0.849967		O			O		O
NM_018685	ANLN	chr7:36363758-36493400	6.24229	6.35022	7.16866	7.12244	6.80574	6.80515	0.849298							O
NM_013246	CLCF1	chr11:67085309-67159158	3.37165	3.49262	4.29845	4.26282	2.7961	2.85827	0.848499		O
NR_038939	MIPEPP3	chr13:21872263-22033508	1.04019	0.899176	1.83764	1.79628	1.90509	2.08591	0.847278	O	O	O		O			O
NM_001128918	MARK3	chr14:103851700-103970166	1.88513	1.93948	2.68185	2.83717	2.56616	2.62053	0.8472		O			O		O	O
NM_133369	UNC5A	chr5:176237559-176326333	0.966397	0.900286	1.73315	1.82784	2.07994	2.00214	0.847152			O	O	O		O
NM_001003682	TMEM200B	chr1:29213602-29450421	1.65534	1.62909	2.33744	2.64066	2.42148	2.38541	0.846837	O
NM_001105248	TMC5	chr16:19422056-19510434	1.85137	1.79991	2.68279	2.66176	2.59388	2.42612	0.846635		O		O	O		O	O
NM_002611	PDK2	chr17:48172100-48207246	2.3156	2.37065	3.19536	3.183	3.67776	3.65508	0.846054		O		O
NM_002858	ABCD3	chr1:94883932-94984219	4.08044	4.10684	4.96161	4.91697	4.93144	5.05395	0.845655		O	O		O		O
NM_003433	ZNF132	chr19:58944180-58951589	1.01167	0.906811	1.80666	1.8013	1.89947	1.9843	0.844739					O
NM_024627	C22orf29	chr22:19775933-19842462	2.2968	2.35921	3.21522	3.12703	2.96369	3.04043	0.843116		O					O
NM_007048	BTN3A1	chr6:26402464-26415444	1.31854	1.48843	2.25193	2.23979	1.90972	2.24609	0.842375
NM_003447	ZNF165	chr6:28048481-28057340	1.79569	1.8595	2.66855	2.67135	2.37859	2.46021	0.842354			O
NM_001135676	C8orf40	chr8:42273979-42408140	1.39353	1.19156	2.12756	2.14217	1.62139	1.46962	0.842319
NM_001079872	CUL4B	chrX:119658445-119709684	4.00797	4.03872	4.89537	4.83588	4.86129	4.95203	0.842285
NM_173549	C8orf47	chr8:99076749-99105838	0.606588	0.532384	1.44666	1.37678	2.09248	2.19942	0.842238
NM_016401	C11orf73	chr11:86013252-86056985	4.9466	4.93156	5.82458	5.73751	5.82658	5.82123	0.841961			O					O
NM_031308	EPPK1	chr8:144939911-144947434	0.982826	0.955464	1.90252	1.71871	2.34521	2.0311	0.841471
NM_006005	WFS1	chr4:6271576-6304992	2.0376	0.946955	2.17946	2.48568	2.77281	2.83538	0.840296					O		O
NM_145065	PELI3	chr11:66233797-66244808	1.01018	1.14579	1.79028	2.04483	1.9905	1.86244	0.839572					O
NM_001195479	TFG	chr3:100428133-100467811	4.6675	4.59677	5.50264	5.44071	5.53341	5.33147	0.83954		O	O		O		O	O
NM_005447	RASSF9	chr12:86198330-86230318	1.14167	1.0649	1.96263	1.92227	1.5012	1.70783	0.839163			O	O		O		O
NM_198080	MSRB3	chr12:65672422-65860687	0.505732	0.460956	1.20001	1.4449	2.33723	2.40442	0.83911							O
NM_005321	HIST1H1E	chr6:26156558-26157343	1.25614	1.55523	1.73837	2.75002	2.06051	2.3477	0.838511		O
NM_001508	GPR39	chr2:133174146-133429070	1.38014	1.19234	2.0428	2.20628	2.01026	2.08677	0.838303		O	O	O	O		O	O
NM_176798	P2RY6	chr11:72975569-73009664	1.80137	1.93752	2.6932	2.72221	2.3552	2.12769	0.838259							O
NM_181491	MED22	chr9:136207754-136214972	3.61742	3.64429	4.47418	4.46385	4.35322	4.35178	0.838162
NM_006500	MCAM	chr11:119179233-119187840	1.30105	1.24848	2.11902	2.10599	3.46099	3.488	0.837741							O
NM_016126	HSPB11	chr1:54387233-54411288	6.49108	6.60471	7.35255	7.41773	7.43361	7.68394	0.837242							O	O
NM_001142555	ADCK4	chr19:41197433-41222790	1.75762	1.26171	2.35641	2.33571	1.87169	1.61716	0.836399
NM_001145462	YIF1B	chr19:38794199-38806606	1.26794	1.1147	2.01706	2.03794	2.3303	2.33797	0.836182		O			O
NM_002997	SDC1	chr2:20400557-20425194	6.23195	6.22798	6.9973	7.13498	6.89409	6.85075	0.836181		O	O	O			O	O
NM_024586	OSBPL9	chr1:52082545-52344609	4.02491	4.00691	4.90095	4.80289	5.16662	5.12097	0.836009		O	O	O	O		O	O
NM_001042461	TRAPPC5	chr19:7745706-7747748	0.492247	0	1.20791	0.955913	0.00574622	1.01715	0.835789		O			O
NM_001242675	AHCYL1	chr1:110527386-110566364	1.83266	1.58414	2.61932	2.46862	1.2617	1.51724	0.835567		O	O		O		O	O
NR_003003	SCARNA17	chr18:47340392-47340813	0	0.284931	1.04063	0.915109	1.08824	0.349476	0.835406
NM_000127	EXT1	chr8:118811601-119124058	5.1524	5.21397	5.98183	6.05371	5.7851	5.81925	0.83459			O	O			O	O
NM_024639	ZNF322	chr6:26634610-26659980	1.67086	1.57804	2.45255	2.46373	2.2183	2.33699	0.83369			O					O
NM_001042517	DIAPH3	chr13:60239720-60738119	2.81428	2.99029	3.75879	3.71225	3.07844	2.84207	0.833244			O	O			O	O
NM_003001	SDHC	chr1:161284165-161337664	5.21573	5.17009	6.06047	5.99166	6.09767	6.18097	0.833156
NM_017823	DUSP23	chr1:159750758-159752333	3.13658	3.16308	3.94859	4.01738	4.64631	4.43257	0.833155			O		O			O
NM_015941	ATP6V1H	chr8:54628102-54755871	3.71979	3.76787	4.56403	4.58949	4.71049	4.84989	0.832936			O	O	O			O
NM_007271	STK38	chr6:36461668-36515247	4.1586	4.1484	4.9816	4.99026	4.67857	4.72544	0.832435		O		O			O	O
NM_152673	MUC20	chr3:195447752-195464540	3.61859	3.60413	4.44651	4.44104	4.11859	4.08162	0.832412						O
NM_001261	CDK9	chr9:130548304-130553052	4.52839	4.44677	5.29212	5.34714	5.3292	5.37425	0.832045					O
NM_152740	HIBADH	chr7:27565058-27702620	4.83585	4.80788	5.63911	5.66814	5.89191	5.94888	0.831759		O	O			O		O
NM_198159	MITF	chr3:69788585-70017488	0.890237	1.01961	1.73942	1.83321	2.16246	1.98084	0.831396			O	O	O	O		O
NM_205862	UGT1A6	chr2:234526290-234681951	0	0	0.76519	0.897104	1.42794	1.6147	0.831147			O					O
NM_001243251	NARS2	chr11:78147006-78285909	2.10011	2.05588	3.02152	2.79672	3.10239	3.32148	0.831121			O	O	O		O	O
NM_001024957	BRMS1	chr11:66104803-66112582	1.77829	1.57732	2.63205	2.38533	2.68254	2.90027	0.830888	O	O
NM_004726	REPS2	chrX:16964813-17171403	0.000538991	9.38813e-05	0.821741	0.840209	0.774238	0.8112	0.830658								O
NM_000832	GRIN1	chr9:140033608-140064491	0.199903	0.45435	1.18578	1.12636	1.64251	1.46407	0.828945			O				O
NM_005768	LPCAT3	chr12:7085346-7125842	4.40966	4.3139	5.18522	5.19583	5.18587	5.13189	0.828747
NM_007098	CLTCL1	chr22:19166986-19279239	0.815231	0.561833	1.43536	1.59912	1.47288	1.27966	0.828708			O		O			O
NM_014324	AMACR	chr5:33987090-34124633	2.32003	2.3942	3.17715	3.19442	2.87547	2.86559	0.828673					O
NR_024531	RPL23AP7	chr2:114368815-114384715	0.644261	0	1.13574	1.16507	0.436803	0.79492	0.828274		O			O
NM_182975	ZNF326	chr1:90460677-90494094	0.856081	1.02138	1.8867	1.6467	1.60862	1.18915	0.827972		O		O			O	O
NM_001129765	NSDHL	chrX:151999510-152037907	1.98006	2.1743	2.97363	2.83618	2.40874	2.45992	0.827724		O			O
NM_177438	DICER1	chr14:95552564-95623759	0.666489	1.24581	1.72409	1.84129	1.37273	0.834432	0.826541		O			O			O
NM_001199165	CEP112	chr17:63631657-64188212	0.665375	0.706991	1.49461	1.53037	1.68236	1.68114	0.826305		O	O	O	O		O	O
NM_003520	HIST1H2BN	chr6:27806439-27806888	0.132367	0.350101	1.32201	0.812678	0.712531	0.851115	0.826109
NM_024117	MAPKAP1	chr9:128199672-128469513	3.45161	3.53396	4.33316	4.3039	3.84365	3.71181	0.825747		O	O	O	O		O	O
NM_030782	CLPTM1L	chr5:1317999-1345002	6.74209	6.75286	7.52988	7.61543	7.85027	7.91568	0.825186				O			O
NM_014051	TMEM14A	chr6:52535883-52551385	5.20723	5.21762	6.05578	6.01822	6.30399	6.23771	0.82458
NM_001008528	MXRA7	chr17:74671808-74707056	2.45725	2.51807	3.21483	3.40962	3.78881	3.82204	0.82456		O	O		O
NM_016061	YPEL5	chr2:30369749-30383399	4.82572	4.73763	5.58778	5.62297	6.23125	6.29283	0.823696		O	O				O	O
NM_003006	SELPLG	chr12:109015679-109027670	0.642885	0.436299	1.32637	1.39864	0.981766	1.02575	0.822913			O		O
NM_178123	SESTD1	chr2:179966418-180129350	3.19542	3.22653	4.05657	4.0112	3.48751	3.4444	0.822911			O	O	O	O		O
NM_001769	CD9	chr12:6309481-6347437	7.59889	7.53928	8.33931	8.44458	8.59826	8.66084	0.822865				O			O	O
NM_138287	DTX3L	chr3:122246759-122294049	4.48325	4.49752	5.32077	5.30558	4.36171	4.39433	0.822788
NM_018420	SLC22A15	chr1:116519118-116612675	0.430151	0.473857	1.31301	1.23623	1.35446	1.44373	0.822615	O		O		O
NM_000221	KHK	chr2:27309610-27341995	1.1548	1.30053	2.02505	2.07545	2.56842	2.49279	0.822585
NM_000603	NOS3	chr7:150688143-150721586	0.0782819	0.123874	0.93514	0.912099	1.37534	1.20353	0.822541					O
NM_001198901	YY1AP1	chr1:155629232-155658823	0.479026	0.559098	1.2365	1.44626	0.654343	0.975216	0.822319		O			O		O
NM_020062	SLC2A4RG	chr20:62371210-62436856	4.34568	4.44884	5.18654	5.25259	4.67137	4.6554	0.822302					O		O
NM_207122	EXT2	chr11:44117098-44266980	3.32256	3.44565	4.29185	4.12036	5.1589	4.69952	0.821999		O			O
NM_001199697	BAG6	chr6:31606804-31625987	1.68661	1.19893	2.29291	2.23586	2.16401	2.14963	0.821607
NM_004332	BPHL	chr6:3118925-3153432	2.56505	2.26197	3.30397	3.1659	3.86678	3.9502	0.821423				O	O
NM_022572	PNKD	chr2:219135114-219211516	3.59871	3.51614	4.42649	4.33083	3.99498	3.94283	0.821236			O		O
NM_001267556	PDCD6	chr5:271735-438405	4.32629	4.40473	5.25717	5.11501	5.27042	5.05172	0.820583		O
NM_203293	TRIM7	chr5:180620923-180632177	0.190094	0.490834	1.22877	1.08914	0.939834	0.739812	0.81849					O
NM_180977	PPP2R5D	chr6:42952329-42981618	1.33909	0.00191548	1.99977	0.978012	0.556658	0.946826	0.818387					O
NM_004756	NUMBL	chr19:41171811-41196556	2.38471	2.32209	3.21346	3.12944	3.53957	3.37356	0.818046
NM_020458	TTC7A	chr2:47129008-47303275	3.34803	3.26587	4.08344	4.16533	3.76192	3.74791	0.817437		O
NM_138355	SCRN2	chr17:45908992-45918699	3.5291	3.45722	4.22978	4.39138	4.42112	4.40868	0.817424		O			O
NM_001036646	HHLA3	chr1:70820492-70833705	0.707586	0	1.29304	1.04878	1.68699	2.32448	0.817118			O
NM_001018057	DKK3	chr11:11984542-12030917	0.378082	0.364381	1.17477	1.20136	2.72393	2.94977	0.816836				O				O
NM_198332	STAT2	chr12:56735381-56754037	1.77758	1.31097	2.47738	2.24449	2.05594	2.08219	0.816656					O
NM_012189	CABYR	chr18:21718954-21741564	0.644081	0.558021	1.36834	1.46667	1.4615	1.76668	0.816456			O					O
NM_014220	TM4SF1	chr3:149086804-149095568	0.870476	0.652242	1.60076	1.55476	2.36856	2.36794	0.816399				O				O
NR_038854	LOC100506668	chr12:120907659-120936298	2.25404	2.31012	3.11779	3.07737	2.83913	3.00441	0.815504
NM_182710	KAT5	chr11:65479472-65488409	0.698511	0.833207	1.73631	1.42577	1.27146	1.18431	0.815181			O					O
NM_033395	KIAA1731	chr11:93394815-93463522	1.95315	2.00708	2.81028	2.7803	2.73226	2.79552	0.815178			O			O		O
NM_001135044	MAPK9	chr5:179660594-179719071	1.86798	1.79742	2.67167	2.62406	2.83241	2.75343	0.81516		O	O					O
NM_001173534	DGCR2	chr22:19023794-19109967	0.0633698	0.00668552	1.3309	0.369206	0.837859	0.00329691	0.815027		O	O		O		O	O
NM_013330	NME7	chr1:169075946-169337186	4.00481	3.89697	4.73757	4.79415	5.3236	5.4357	0.814969
NM_005130	FGFBP1	chr4:15937192-15940363	2.51603	2.22116	3.10879	3.25815	3.14559	3.42235	0.814872						O	O	O
NM_000503	EYA1	chr8:72109667-72274467	0.461402	0.586649	1.32639	1.35072	1.12149	0.935482	0.814528			O	O		O		O
NM_021953	FOXM1	chr12:2945981-2998691	4.54624	4.52892	5.34572	5.3578	4.41048	4.4649	0.814181					O
NM_016371	HSD17B7	chr1:162760495-162782608	3.0007	3.06457	3.86966	3.8238	3.60864	3.63029	0.814097							O
NM_002087	GRN	chr17:42422490-42430470	6.04278	5.81766	6.68208	6.80569	7.21112	7.15265	0.813668					O		O
NM_030771	CCDC34	chr11:27360060-27384795	3.31109	3.38286	4.11533	4.20589	3.84499	3.86145	0.813632			O					O
NM_004163	RAB27B	chr18:52495707-52562747	1.75692	1.73444	2.61805	2.49971	2.25902	2.34043	0.813196		O	O	O	O	O	O	O
NM_001032221	STXBP1	chr9:130374485-130454995	1.90888	1.87677	2.70011	2.71077	3.53658	3.3965	0.812611					O		O
NM_033285	TP53INP1	chr8:95938199-95961615	0.536453	0.601186	1.23973	1.52275	1.77182	1.34003	0.812425				O		O
NR_045216	LOC100652770	chr18:29078026-29136874	1.17845	1.0042	1.96591	1.84155	1.73914	1.44619	0.812411
NM_004223	UBE2L6	chr11:57319127-57335803	4.47916	4.28981	5.23958	5.15341	5.2807	5.3096	0.812009					O
NR_033792	TAF6	chr7:99690403-99723128	1.33409	1.29439	2.22353	2.02735	1.98463	1.75239	0.811197					O
NM_014606	HERC3	chr4:89513646-89629686	1.62609	1.59766	2.49798	2.3475	2.69296	2.66904	0.810858			O		O			O
NM_000157	GBA	chr1:155204238-155214653	3.52618	3.49135	4.31396	4.32488	4.44967	4.42592	0.810653		O			O
NM_000276	OCRL	chrX:128674251-128726530	2.0908	1.74121	2.8538	2.59929	2.68972	2.6972	0.810537		O			O
NM_001144759	PHLDB1	chr11:118477212-118528748	1.90036	1.91101	2.71936	2.71224	2.79316	2.77992	0.810116				O	O		O
NM_001009566	CLSTN1	chr1:9711789-9884550	1.5869	1.6615	2.45243	2.41551	3.00566	3.09027	0.809768						O	O	O
NM_033375	MYO1C	chr17:1367479-1396001	3.95663	3.6774	4.56671	4.68617	4.33233	4.59944	0.809427		O
NM_002350	LYN	chr8:56792385-56925006	4.08943	4.09812	4.85757	4.94854	4.14187	4.14499	0.809274		O	O		O		O	O
NM_001130849	CAB39	chr2:231577556-231685790	0.602409	0.857919	1.73392	1.34393	1.14581	1.49015	0.808758					O			O
NM_001102	ACTN1	chr14:69340839-69446083	5.39762	5.35201	6.15314	6.21118	6.1074	6.0885	0.807345	O		O					O
NM_020762	SRGAP1	chr12:64238540-64541613	1.43889	1.45927	2.33508	2.17712	2.26878	2.20317	0.807016					O		O	O
NM_014281	PUF60	chr8:144898546-144911537	5.02076	4.92098	5.74345	5.81032	5.22055	5.1444	0.806017		O	O		O
NM_001105214	ASH2L	chr8:37963010-37997598	0.523191	0.446136	1.17199	1.40875	0.864896	1.2849	0.805709		O		O			O
NM_032641	SPSB2	chr12:6976583-6982521	2.72093	2.7301	3.48504	3.57732	4.01561	4.03572	0.805669
NM_004358	CDC25B	chr20:3776400-3786761	0.801292	1.20761	1.72269	1.89724	0.512119	1.36734	0.805518		O	O
NM_013312	HOOK2	chr19:12873816-12886434	0.322352	0.314773	1.34607	0.901871	2.0386	0.78353	0.805409		O			O
NM_033010	PCBP4	chr3:51989329-52001482	0.402557	0.000232262	0.000147316	2.01304	0.788974	1.88058	0.805199					O
NM_033020	TRIM33	chr1:114935398-115053781	1.74046	1.34253	2.34059	2.35237	2.63428	2.4493	0.804982			O		O		O	O
NM_004462	FDFT1	chr8:11660189-11696818	6.02634	6.02905	6.85489	6.80963	6.53773	6.65454	0.804572				O		O	O
NM_198041	NUDT6	chr4:123747862-123844159	1.30064	1.41922	2.11871	2.20991	2.59071	2.50191	0.804377	O				O
NM_022834	VWA1	chr1:1370902-1378262	1.69779	1.69011	2.42966	2.56675	2.56869	2.39933	0.804259					O
NM_001135050	IGSF9	chr1:159896828-159915386	1.14644	1.26614	2.07626	1.94422	2.92946	2.99235	0.803951		O			O		O
NM_000212	ITGB3	chr17:45331207-45390077	0.809237	0.720564	1.62156	1.5154	2.28598	2.22057	0.80358			O		O		O
NM_001025234	TSPAN4	chr11:842823-867116	2.98694	2.92231	3.79208	3.72413	3.58859	3.55589	0.803477		O					O
NM_001144869	LIPT2	chr11:74202922-74204755	1.1387	1.29961	2.00204	2.04235	1.63746	1.67177	0.803038		O			O			O
NM_153232	EID2	chr19:40029446-40030838	3.52021	3.65805	4.30173	4.48142	4.94676	5.01681	0.802448		O			O
NM_001171991	HCCS	chrX:11129405-11141204	0.287962	1.02053	1.35959	1.55345	0.844265	1.24237	0.802271		O	O					O
NM_000110	DPYD	chr1:97543299-98386615	3.31955	3.26269	4.13866	4.04602	2.98659	3.0871	0.801218					O			O
NM_002076	GNS	chr12:65107221-65153226	4.76632	4.70608	5.551	5.52295	6.0683	6.12877	0.800774				O	O		O
NR_048553	C11orf80	chr11:66512206-66614003	2.58018	2.39164	3.27151	3.30138	2.97756	2.96357	0.800538				O	O		O
NM_001082577	RBFOX2	chr22:36134782-36424585	1.18971	1.16549	2.52994	1.42608	2.5641	2.87385	0.800411		O	O	O	O		O	O
NM_173808	NEGR1	chr1:71868624-72748277	0.0406067	0.100585	0.949966	0.792024	2.50638	2.47402	0.800399			O				O	O
NR_028482	DCAF17	chr2:172173912-172341562	1.68803	1.58043	2.43568	2.43285	2.66668	2.69408	0.800031			O					O
NM_005836	HRSP12	chr8:99114566-99129418	4.14423	4.12936	4.96926	4.90199	4.89076	4.91326	0.798832					O
NM_015374	SUN2	chr22:39130718-39152024	4.30687	4.32066	4.96554	5.25718	5.11813	5.15547	0.797598	O				O
NM_001177388	LGALS3	chr14:55595934-55612148	0.912946	1.30473	0	3.81272	3.31553	4.74814	0.797522					O		O	O
NM_001012320	ZNF302	chr19:35168566-35177302	1.72006	1.96765	2.49206	2.79067	2.00079	2.24153	0.79751		O			O		O
NM_002477	MYL5	chr4:671710-682973	0.620031	0.413584	1.28683	1.3418	1.74896	1.56342	0.797505				O
NM_001251885	VIPR1	chr3:42530790-42579065	1.10624	0.000640347	1.27888	1.42269	1.19346	1.38124	0.797343		O		O	O			O
NM_004491	ARHGAP35	chr19:47421932-47508333	3.90846	4.06064	4.7878	4.77583	4.59096	4.61285	0.797263							O	O
NM_005514	HLA-B	chr6:31321648-31324989	2.23595	2.38399	3.06123	3.1527	4.04324	3.91246	0.796994							O
NM_006369	LRRC41	chr1:46713366-46769038	3.36425	3.42288	4.14258	4.23788	3.82215	3.79487	0.796663						O
NM_001134422	CDV3	chr3:133292433-133309118	4.08327	4.07387	4.78003	4.9698	4.86519	4.76923	0.796343			O	O			O	O
NM_138464	C5orf55	chr5:441642-443258	1.4521	1.46249	2.16475	2.34183	2.96458	2.82697	0.795992				O	O		O
NM_000203	IDUA	chr4:972862-998317	0.818968	0.653222	1.53137	1.53256	1.27194	0.981834	0.795872					O
NM_001242531	ZNF83	chr19:53115617-53193886	0.355518	0.371407	1.05519	1.26269	1.36863	1.41662	0.795478		O	O		O
NM_002252	KCNS3	chr2:18059944-18114225	4.37972	4.43779	5.20596	5.20161	5.01367	4.93649	0.795027		O		O	O		O	O
NM_198149	SHISA4	chr1:201857796-201861715	0.492843	0.611412	1.02035	1.67335	2.32948	1.95294	0.794724					O		O
NM_001256409	LRRC42	chr1:54411998-54433841	3.47192	3.51896	4.22301	4.35645	4.01467	4.471	0.794287
NM_001039792	HRCT1	chr9:35906188-35907138	0	0.0843144	0.723042	0.949261	0.671311	0.535964	0.793994
NM_014141	CNTNAP2	chr7:145813452-148118088	1.28792	1.36138	2.13185	2.10541	1.9994	2.03905	0.79398			O					O
NR_037840	IL15	chr4:142557748-142655140	0.509663	0.372074	1.3741	1.0953	1.35617	1.17915	0.793833	O	O	O	O	O	O	O	O
NR_002312	RPPH1	chr14:20811229-20811570	4.1929	4.7147	4.02419	6.47082	5.05189	4.84786	0.793704						O
NR_024434	LOC100133991	chr17:43325302-43394414	1.2306	1.33448	2.27929	1.87216	1.87917	1.92925	0.793181
NM_018161	NADSYN1	chr11:71164216-71212581	3.72544	3.7219	4.48074	4.55239	4.20447	4.25909	0.792896
NM_001099289	SH3RF3	chr2:109743783-110262207	0.383406	0.355154	1.12322	1.20088	1.18368	1.12314	0.792768
NR_046299	PMS2P4	chr7:66741117-66767429	1.99451	1.32914	2.48323	2.42446	2.89542	2.96917	0.792022			O				O
NM_152943	ZNF268	chr12:133757994-133783697	2.17364	2.07896	2.90496	2.93122	3.04214	3.11432	0.791793		O			O
NM_144778	MBNL2	chr13:97874549-98046374	2.67937	2.15269	3.17691	3.23813	2.99671	2.91329	0.791488						O		O
NM_130469	JDP2	chr14:75894508-75939404	0.396733	0.610346	1.10587	1.48064	0.936751	1.55828	0.789715		O	O					O
NM_001143993	RASSF7	chr11:560970-564025	4.21864	4.30396	5.00672	5.09507	5.17887	5.14024	0.789591
NM_016219	MAN1B1	chr9:139981378-140003639	4.41847	4.39048	5.1356	5.25225	5.0959	5.19268	0.789447		O
NM_001135654	PABPC4	chr1:40026484-40042521	1.22709	1.49984	1.85333	2.45224	2.20438	2.08389	0.789314					O
NM_032242	PLXNA1	chr3:126707436-126756235	3.77193	3.8046	4.5575	4.59751	4.51302	4.4103	0.78924			O	O			O
NM_001199324	ZNF615	chr19:52494586-52511483	1.10847	1.15629	1.95137	1.89143	1.49449	1.91316	0.789021
NM_006766	KAT6A	chr8:41786996-41909505	2.07183	2.10881	2.96292	2.79504	2.58613	2.54791	0.788658		O	O	O	O		O	O
NM_001143761	EIF5A	chr17:7210317-7215782	5.59697	5.71085	6.49889	6.38543	6.42988	6.34098	0.788252		O
NM_032323	TMEM79	chr1:156252703-156262234	0.161056	0.116852	0.819138	1.03511	1.61751	1.61608	0.788171
NM_001101	ACTB	chr7:5566778-5570232	10.6929	10.6341	11.4572	11.4443	11.1199	11.0208	0.787257		O	O	O
NM_014070	C6orf15	chr6:31078999-31080332	0.2164	0.142467	0.94206	0.989298	0.805192	0.865487	0.786245
NM_001161705	BFSP1	chr20:17474549-17539605	0.278145	0.202296	0.917011	1.13578	0.955282	0.976174	0.786177					O	O	O	O
NM_001007253	ERV3-1	chr7:64434829-64467124	2.85194	2.7363	3.71062	3.44972	3.88275	3.73226	0.78605
NM_032288	FYTTD1	chr3:197398258-197511317	4.11537	4.12767	4.88276	4.93234	5.10795	5.13267	0.786027					O
NM_001003722	GLE1	chr9:131266970-131304580	4.15972	4.20475	4.96951	4.96672	4.23456	4.29366	0.785879		O
NM_152945	RBM45	chr2:178977181-178994382	2.80615	2.92517	3.64138	3.66168	3.58469	3.59711	0.785871					O
NR_003148	LOC147804	chr19:53935226-53961515	1.49234	1.49504	2.27279	2.28594	2.35946	2.24363	0.785675
NM_022750	PARP12	chr7:139723548-139763521	2.94465	2.86971	3.67024	3.71519	3.44642	3.62396	0.785536		O		O			O
NM_000864	HTR1D	chr1:23518387-23521222	0.950772	1.00882	1.71453	1.81614	1.60551	1.77608	0.785536	O					O	O
NM_001251989	GMNN	chr6:24775158-24786325	4.48396	4.60214	5.35066	5.3064	5.22932	5.47021	0.785477
NM_005510	DOM3Z	chr6:31937587-31949223	1.09652	0.993779	1.81896	1.8401	1.47747	1.47199	0.78438
NM_012431	SEMA3E	chr7:82993221-83278479	0.712318	0.871312	1.59767	1.55454	1.96243	1.94398	0.78429			O					O
NM_001006932	RPS6KA2	chr6:166822853-167275771	0.000214735	0	0.507267	1.06111	1.18206	1.22275	0.784079		O	O	O	O		O	O
NM_018075	ANO10	chr3:43407817-43663560	2.84515	2.81573	3.62596	3.60297	3.94975	4.08666	0.784024			O		O		O
NM_001153	ANXA4	chr2:69969126-70053596	4.81048	4.72352	5.58837	5.51262	5.14171	5.20943	0.783494		O			O			O
NM_000210	ITGA6	chr2:173292313-173371181	3.41217	3.4092	4.19421	4.19269	4.62684	4.64777	0.782764			O		O		O	O
NM_001243730	RARG	chr12:53604349-53626040	0.552628	0.503851	1.31601	1.30534	1.14862	0.336858	0.782437
NM_153026	PRICKLE1	chr12:42852139-42983572	0.139911	0.000541398	1.20423	0.500008	0.804928	0.483052	0.781892					O
NM_130473	MADD	chr11:47290926-47351582	0.618939	0.00505177	1.05487	1.13173	0.55105	0.975252	0.781307		O
NM_001083314	CHMP1A	chr16:89710838-89724129	2.11213	2.05718	3.08181	2.64917	2.96672	2.81726	0.780835
NM_015651	PHF19	chr9:123617930-123639606	3.24585	3.22766	4.01757	4.01752	2.49536	2.38552	0.780786		O			O
NM_014714	IFT140	chr16:1543351-1662109	1.48192	1.37701	2.23137	2.18808	2.4522	2.48122	0.78026					O
NM_001040438	C6orf48	chr6:31802692-31807541	4.52723	4.32713	5.22891	5.18522	4.82409	4.64606	0.77989						O
NM_006870	DSTN	chr20:17550598-17588652	8.56699	8.47062	9.26688	9.33036	8.94149	8.99221	0.779812		O				O	O	O
NM_031297	RNF208	chr9:140114698-140115775	3.01807	2.94364	3.69521	3.82514	3.46904	3.33382	0.779325				O
NM_001130981	DYSF	chr2:71680752-71913893	0.0720613	0.0631953	0.911967	0.781617	1.0987	0.736419	0.779164			O				O	O
NM_032937	C9orf37	chr9:140500095-140513308	2.24198	2.44171	3.13221	3.10827	3.24265	3.13358	0.778389
NM_001135823	SSPN	chr12:26348268-26387708	0.463436	0.384388	1.13498	1.2695	1.04178	1.18347	0.778329			O	O				O
NM_001102454	ZNF219	chr14:21558204-21572863	0.97861	1.317	1.3811	2.47049	1.46213	1.39682	0.777993		O			O
NM_206963	RARRES1	chr3:158414896-158450275	0.69381	0.683259	1.38815	1.54455	0.854505	1.15088	0.777818			O		O
NR_024063	ZSCAN12P1	chr6:28058928-28063493	0.419762	0.411342	1.27986	1.10634	0.832211	0.712397	0.777548							O
NR_038220	LOC170425	chr10:86039735-86054415	0.305004	0.380229	1.11454	1.12457	0.809718	0.8138	0.776937
NM_005252	FOS	chr14:75745480-75748937	5.03095	5.16175	5.84319	5.90326	6.25687	6.46593	0.776883		O		O			O
NM_004263	SEMA4F	chr2:74881392-74909185	1.61005	1.62876	2.35699	2.4355	3.39683	3.49633	0.776837			O		O		O	O
NM_203462	MRFAP1L1	chr4:6709428-6711606	5.25506	5.33021	6.04091	6.09761	5.90735	5.99832	0.776629					O
NR_051993	DIAPH3-AS1	chr13:60239720-60738119	0.786367	0.428619	1.19346	1.57407	0.938761	1.32616	0.776271			O	O			O	O
NM_021159	RAP1GDS1	chr4:99182526-99365012	0.993966	0.731827	1.60335	1.67487	1.05331	1.00954	0.776212		O	O		O			O
NM_198488	FAM83H	chr8:144806102-144815914	4.58693	4.60503	5.35779	5.38627	5.17546	4.91754	0.776048
NM_014640	TTLL4	chr2:219575567-219620138	2.75297	2.63239	3.5358	3.39994	2.88533	2.77	0.775195		O	O		O			O
NM_001008738	FNIP1	chr5:130977406-131132756	0.323101	0.568571	1.40211	1.03782	1.18789	0.98747	0.774125		O	O	O	O		O	O
NM_018034	WDR70	chr5:37379411-37752774	4.58538	4.64661	5.37383	5.40605	5.23928	5.41854	0.773947			O				O
NR_033796	DSTNP2	chr12:6993845-6994950	2.44974	2.08003	2.95206	3.12558	3.02769	3.10637	0.773936								O
NM_173832	ZFP41	chr8:144329108-144344875	1.27515	1.24201	2.0065	2.05809	2.4279	2.38238	0.773715		O			O
NM_005124	NUP153	chr6:17615268-17706818	4.20334	4.25617	5.02223	4.98261	4.73856	4.7783	0.772662		O	O	O		O	O
NM_001003789	RABL2B	chr22:51195513-51238065	0.00118176	0.205165	1.02431	0.726631	1.15701	1.17288	0.772295					O
NM_021623	PLEKHA2	chr8:38758752-38831430	2.30687	2.28563	3.0589	3.07789	2.74334	2.70356	0.772142			O		O		O
NM_018922	PCDHGB1	chr5:140710251-140892548	1.53686	1.46479	2.34223	2.20322	1.88649	1.54631	0.771898
NM_001167607	GM2A	chr5:150632612-150649953	0.670033	0.926689	1.64704	1.49309	1.90178	1.78698	0.771702							O
NM_001193329	C9orf3	chr9:97488950-97849500	1.60167	0.796431	1.71647	2.22486	1.83573	1.57891	0.771615								O
NM_203284	RBPJ	chr4:26321331-26436752	3.59648	3.51359	4.33599	4.31659	4.24695	4.21224	0.771252		O	O	O			O	O
NM_001008895	CUL4A	chr13:113863085-113919392	3.80485	3.99533	4.87777	4.46379	4.49147	3.90176	0.770688		O	O		O		O	O
NM_057169	GIT2	chr12:110367606-110434194	1.72725	1.91384	2.5955	2.58494	2.5741	2.57781	0.76967					O		O
NM_018901	PCDHA10	chr5:140165875-140391929	0.987771	0.0468299	1.07765	1.49363	1.51789	1.17624	0.768342		O
NM_024605	ARHGAP10	chr4:148653452-148993927	2.54463	2.51485	3.25887	3.33713	3.36679	3.46507	0.768258				O	O			O
NM_015892	CHST15	chr10:125767181-125851930	2.97841	3.05981	3.75035	3.82413	3.35381	3.33767	0.768126		O	O	O			O	O
NM_007332	TRPA1	chr8:72753776-72987819	0.145273	0.219594	0.989269	0.91074	0.842384	0.947156	0.767571								O
NM_177441	TMUB2	chr17:42264353-42269099	3.58715	3.53497	4.32948	4.3269	4.43217	4.465	0.767134
NM_000320	QDPR	chr4:17488015-17513857	3.06991	3.08149	3.85835	3.82607	3.95825	3.83797	0.766512				O	O		O
NM_017489	TERF1	chr8:73921096-73959987	3.47238	3.44448	4.1909	4.25819	4.26448	4.19688	0.766109			O		O		O	O
NM_025194	ITPKC	chr19:41223007-41255828	3.29417	3.33701	4.00411	4.15693	3.79508	3.78904	0.764928
NM_001244570	BID	chr22:18216905-18257431	2.06626	1.99173	2.91899	2.66839	2.29999	2.21686	0.764691		O		O
NM_000695	ALDH3B2	chr11:67429632-67448685	1.36664	1.34043	2.22043	2.01554	1.98423	1.97891	0.764448				O	O		O
NM_015303	VPS8	chr3:184529930-184770402	2.49215	2.43411	3.2562	3.19888	3.53373	3.67056	0.76441					O	O
NM_152856	RBM10	chrX:47004616-47046214	0.918566	0.91696	1.41161	1.95226	1.29279	0.756121	0.764174		O
NM_153360	APCDD1L	chr20:57034425-57089949	0.667729	0.573937	1.40207	1.3677	1.35076	1.1996	0.764051			O	O			O
NM_001135022	ELMOD3	chr2:85581842-85618875	1.48031	1.40251	2.35445	2.05408	1.33236	1.35392	0.762851
NM_004417	DUSP1	chr5:172195092-172198203	5.54841	5.73499	6.30545	6.50348	7.1762	7.32973	0.762768		O						O
NM_005085	NUP214	chr9:134000980-134109091	3.21133	3.24912	4.05651	3.92827	3.86261	3.81392	0.76216		O	O				O	O
NM_005166	APLP1	chr19:36359400-36370699	1.27637	1.03877	1.80353	2.03576	3.87666	3.76339	0.762076					O		O
NM_016240	SCARA3	chr8:27491576-27534286	1.26457	1.242	1.95586	2.07482	2.35001	2.37524	0.762051							O
NM_001011724	HNRNPA1L2	chr13:53191604-53217919	0.850864	0.873094	1.76952	1.47773	1.28043	1.60199	0.761646		O					O
NM_014898	ZFP30	chr19:38123388-38146313	1.29764	1.33558	2.0945	2.06098	2.06797	2.21101	0.761128					O
NM_014786	ARHGEF17	chr11:73019662-73080425	2.06598	2.09386	2.84644	2.83493	2.6067	2.56588	0.76077		O					O
NM_005417	SRC	chr20:35973087-36033821	2.89198	2.9935	3.70623	3.69994	3.00775	2.95955	0.760345
NM_001031711	ERGIC1	chr5:172261222-172379688	5.9703	6.01117	6.76107	6.74062	7.20014	7.18945	0.760106				O	O			O
NM_006788	RALBP1	chr18:9475529-9538106	4.0973	4.18206	4.85618	4.94288	4.99343	4.94094	0.75985		O			O		O	O
NM_001155	ANXA6	chr5:150480266-150537443	2.72412	2.75895	3.46218	3.5403	5.32803	5.43176	0.759707				O			O	O
NM_018201	TBC1D13	chr9:131549509-131572711	3.26232	3.31374	4.06565	4.02947	3.77521	3.8144	0.75953		O			O
NM_002230	JUP	chr17:39910858-39942964	5.04742	4.97941	5.77288	5.77281	5.6389	5.56454	0.759428		O		O			O
NM_001173408	OBSL1	chr2:220415449-220436268	2.08425	2.14854	2.81166	2.93987	2.33677	2.22096	0.759369					O
NM_001166049	ERCC1	chr19:45882891-45927177	2.2053	2.50564	3.26935	2.95953	2.9383	2.5793	0.758979				O		O
NM_138799	MBOAT2	chr2:8996700-9143876	4.89578	4.8114	5.61742	5.60727	5.74083	5.77738	0.758755			O		O			O
NM_001163435	TBCK	chr4:106967232-107270381	0.474565	0.364467	1.23608	1.12012	0.729172	1.5839	0.758585								O
NM_006074	TRIM22	chr11:5710816-5732093	0.181895	0.277218	0.865874	1.11017	0.362164	0.256746	0.758465
NM_152864	NKAIN4	chr20:61872135-61892967	0.996895	1.08142	1.81281	1.78215	0.930006	0.980996	0.758323
NR_024124	ATP1A1OS	chr1:116915794-116961244	0.766718	0.687123	1.41617	1.55377	1.50577	1.49086	0.758048
NR_024110	SBDSP1	chr7:72299951-72307978	2.30062	2.40589	3.20701	3.01545	2.75718	2.81661	0.757979					O
NM_001334	CTSO	chr4:156845269-156875048	1.87998	1.8154	2.60219	2.60697	2.34342	2.29174	0.756893			O	O	O			O
NM_152487	TMEM56	chr1:95558072-95712781	2.76293	2.68501	3.48899	3.4725	3.60709	3.53397	0.756775		O	O		O		O	O
NM_018067	MAP7D1	chr1:36621802-36646441	4.10602	4.22392	4.87903	4.96328	5.24462	5.18514	0.756185
NM_033430	PDE5A	chr4:120375937-120549981	0.676646	0.00203631	1.47659	0.71282	1.7758	1.15446	0.755364					O
NM_153226	SLC35G1	chr10:95653729-95662491	0.00352318	0.0277154	1.36745	0.174482	0.000117431	0.00495571	0.755349		O	O		O			O
NM_001145191	FAM200B	chr4:15683351-15692070	1.64798	1.67394	2.43809	2.39418	2.52021	2.47156	0.755178						O		O
NM_001254738	RND3	chr2:151324706-151344209	4.47784	4.70304	5.36641	5.32438	5.55148	5.65652	0.754955			O	O			O	O
NM_001258311	PGBD5	chr1:230457391-230561674	1.29349	1.17521	2.00328	1.97438	2.23762	2.3207	0.754479				O	O		O	O
NM_198567	C5orf25	chr5:175665369-175772990	0.861628	0.729033	1.39455	1.70503	1.69709	1.87606	0.754458
NR_030684	TRAPPC1	chr17:7833662-7835317	0.762481	0.827992	1.64812	1.45102	1.45684	2.0068	0.754338		O			O
NM_001134380	TBC1D5	chr3:17198653-17784240	2.50758	2.42278	3.20201	3.23593	3.35434	3.45279	0.753788			O	O	O	O	O	O
NM_000487	ARSA	chr22:51061181-51066601	2.40604	2.31677	3.13993	3.08902	3.61552	3.86317	0.75307		O		O	O
NM_018240	KIRREL	chr1:157963062-158065844	1.70784	1.7138	2.54582	2.38169	2.33378	2.2192	0.752939			O				O	O
NM_024294	C6orf106	chr6:34555065-34664625	4.50687	4.49479	5.21169	5.29493	5.23951	5.20865	0.752474			O		O		O	O
NM_001247996	ASAP1	chr8:131064350-131455906	1.79771	2.16649	2.90872	2.56042	2.77196	2.76042	0.752468			O	O			O	O
NM_019845	RPRM	chr2:154333851-154335322	1.40805	1.44756	2.0926	2.26665	2.52347	2.06975	0.75182			O		O			O
NM_148913	ABHD11	chr7:73150424-73153190	0.000608056	1.82896	2.14977	1.18301	0.643316	0.000300918	0.751608
NM_022970	FGFR2	chr10:123237843-123357972	0.925435	0.86016	1.56593	1.72219	1.4671	1.36641	0.751262			O	O	O		O	O
NM_032299	DCUN1D5	chr11:102921412-102962944	2.48317	2.56042	3.352	3.19406	3.39531	3.3397	0.751235			O		O			O
NR_033849	LOC100128338	chr8:144816309-144828507	3.59866	3.66971	4.41901	4.35158	3.56846	3.5166	0.751107
NR_046360	FAM49B	chr8:130851838-131028897	2.3569	2.33554	3.17756	3.01689	2.77399	3.1438	0.75101		O	O		O		O
NM_014846	KIAA0196	chr8:126036502-126104061	4.2136	4.21499	4.97412	4.95596	4.94804	5.04688	0.750747
NM_176794	MRPL43	chr10:102732285-102747272	2.0562	2.04825	2.90018	2.70569	2.82199	2.9938	0.750712		O			O
NM_054012	ASS1	chr9:133320093-133376661	5.52845	5.35468	6.12213	6.26165	5.64555	5.7695	0.750329		O		O			O
NM_018197	ZFP64	chr20:50700549-50808524	2.3337	2.10206	2.92324	3.01311	2.47455	2.49881	0.750301		O		O	O		O	O
NM_025114	CEP290	chr12:88429267-88535993	1.88145	2.06263	2.7199	2.72274	3.06582	3.07524	0.749277			O				O	O
NM_003711	PPAP2A	chr5:54603575-54830873	2.48387	2.46785	3.19303	3.25564	3.34429	3.40117	0.74847		O	O					O
NM_002097	GTF3A	chr13:27998680-28024739	6.16108	6.17619	6.87331	6.96034	6.32823	6.44344	0.748187		O		O	O		O
NM_181783	TMTC3	chr12:88536072-88593664	3.65158	3.68117	4.43826	4.39081	4.68731	4.6745	0.748158			O	O		O	O	O
NM_018677	ACSS2	chr20:33462765-33515769	1.84058	1.86941	2.75182	2.45446	2.84483	2.222	0.748146				O	O		O
NM_001079521	KTN1	chr14:56046924-56151302	4.40718	4.57769	5.23624	5.2441	5.12493	5.11415	0.747738		O	O		O			O
NM_001039496	C11orf20	chr11:64067862-64072239	1.03993	0.952202	1.63865	1.84819	2.06377	2.3116	0.747355
NM_001077663	URGCP	chr7:43906156-43965996	2.52845	2.77029	3.40949	3.38394	2.7961	2.92836	0.747344		O			O
NM_001135822	FDPS	chr1:155278538-155300909	5.48839	5.59657	6.30386	6.27566	5.97405	6.10471	0.747279
NM_016281	TAOK3	chr12:118587605-118810750	2.16579	2.16082	2.84243	2.97777	3.11113	3.08453	0.746796			O				O	O
NM_013274	POLL	chr10:103338638-103348027	0.201771	0.00573057	1.08106	0.619579	1.54078	0.0474782	0.746569		O			O		O
NM_005823	MSLN	chr16:810764-818865	0.242023	0.230683	1.01626	0.949554	1.10178	1.14065	0.746554
NM_005892	FMNL1	chr17:43299291-43324683	2.02257	1.94098	2.72629	2.73014	2.4392	2.50909	0.746442
NM_002961	S100A4	chr1:153516094-153518282	6.67965	6.59963	7.25428	7.51762	7.08111	7.52874	0.746313
NM_020360	PLSCR3	chr17:7284292-7307450	2.57161	2.67871	3.28218	3.46045	3.69206	3.75783	0.74616					O
NM_006717	SPIN1	chr9:91003296-91093622	4.91314	4.89316	5.64469	5.65193	5.52022	5.55907	0.745162		O	O	O	O		O
NM_032294	CAMKK1	chr17:3763616-3796337	2.06332	1.75927	2.70793	2.60488	2.58527	2.39585	0.745115		O		O
NM_001262	CDKN2C	chr1:51434366-51440309	2.52535	2.61529	3.2606	3.36932	2.2906	2.19429	0.744636		O		O	O		O
NM_014811	PPP1R26	chr9:138371647-138380739	2.86283	2.90478	3.63979	3.61629	3.77811	3.62009	0.744236		O
NM_001112704	VAX1	chr10:118888031-118897812	0.108351	0.164074	0.784052	0.976455	0.607222	0.694254	0.744041					O
NM_014900	COBLL1	chr2:165541257-165697928	1.085	1.13699	1.8619	1.84804	1.78189	1.77322	0.743977			O					O
NM_002541	OGDH	chr7:44646120-44748669	4.21907	4.13687	4.90562	4.93693	4.6669	4.56608	0.743308					O			O
NM_014353	RAB26	chr16:2198650-2204141	2.24141	2.0811	2.92239	2.8853	2.8837	2.68404	0.742587				O			O
NM_014951	ZNF365	chr10:64133915-64431771	0.524992	0.48191	1.21688	1.27495	2.37242	2.3216	0.742464			O		O		O	O
NM_033121	ANKRD13A	chr12:110437234-110477235	3.46425	3.51315	4.19598	4.26608	4.23308	4.23209	0.74233					O
NM_012087	GTF3C5	chr9:135906061-135933890	4.67598	4.9198	5.53489	5.54553	5.69809	5.6937	0.742321					O
NM_001122636	GALNT9	chr12:132680916-132905905	0.0920847	0.110883	0.839893	0.847265	0.310042	0.238536	0.742095				O	O		O
NM_001128224	TMCC1	chr3:129366634-129612419	0.347979	1.04339	1.32875	1.54673	1.90234	1.78669	0.742056			O		O	O		O
NM_006009	TUBA1A	chr12:49578582-49582861	4.55167	4.59161	5.237	5.39006	6.95535	7.02099	0.741887					O		O	O
NM_005158	ABL2	chr1:179068461-179198819	0.96554	1.07486	1.75446	1.76949	1.95053	2.03112	0.741776		O	O		O	O	O	O
NR_003008	SCARNA5	chr2:234160216-234204320	0.7833	0.741239	0.386437	2.62148	0.747361	1.16313	0.741686
NM_001130720	AHCYL2	chr7:128864854-129070052	0.538603	0.129876	0.938376	1.21298	1.31495	1.079	0.741439		O			O
NM_024770	METTL8	chr2:172173912-172341562	1.24779	1.22777	1.95924	1.99855	1.97432	1.97164	0.741108
NM_033000	GTF2I	chr7:74072029-74175022	2.56768	2.50632	3.29203	3.26312	2.85721	2.80783	0.740576							O	O
NM_001018025	MTCP1	chrX:154289899-154299547	0.678122	0.978727	1.63495	1.50134	1.51428	1.3938	0.739717
NM_018248	NEIL3	chr4:178230990-178284092	3.01908	3.04307	3.75251	3.78874	3.08897	3.09151	0.739549								O
NM_206836	ECI2	chr6:4068592-4135831	1.4339	1.50668	2.17928	2.23906	3.01102	3.26435	0.738879							O
NM_080546	SLC44A1	chr9:108006928-108153682	5.91884	5.97014	6.68	6.68622	6.23009	6.25363	0.738623			O	O	O		O	O
NM_004430	EGR3	chr8:22545173-22550815	0.220678	0.115813	0.935057	0.877956	1.51969	2.03359	0.738261				O			O
NM_015146	42255	chr5:132083136-132113561	3.52717	3.78935	4.36601	4.42701	4.38922	4.3513	0.738246
NM_018950	HLA-F	chr6:29691116-29716826	1.44189	1.38997	2.24445	2.06354	3.58708	3.53823	0.738067		O			O		O
NM_006053	TCIRG1	chr11:67806461-67818366	2.49985	2.4779	3.19482	3.25841	3.07044	2.96825	0.737736		O
NM_001198844	RBM4	chr11:66384052-66445275	2.06649	2.16334	2.97914	2.72467	2.6443	2.64636	0.736983
NM_001143688	DIS3L	chr15:66585632-66626236	1.0251	0.825718	1.74797	1.57601	2.0431	1.62344	0.736582		O			O
NM_005560	LAMA5	chr20:60884120-60942368	5.46822	5.37023	6.20514	6.10535	6.07418	5.75204	0.736016			O
NM_153828	RTN4	chr2:55199326-55277734	6.98506	6.94678	7.61178	7.79184	8.12091	7.9496	0.735892			O	O	O	O		O
NM_201555	FHL2	chr2:105977282-106055230	2.64092	2.24802	3.29854	3.06169	3.39806	3.519	0.735642		O		O		O	O	O
NR_046325	KDM5B-AS1	chr1:202780073-202781041	0.284454	0.286264	0.890557	1.15009	1.20465	1.4111	0.734966
NM_000155	GALT	chr9:34646585-34650595	3.27553	3.32272	4.06353	4.00426	4.01426	4.00176	0.734768					O
NM_001171091	UBXN6	chr19:4445002-4457791	0.0164919	0.145787	1.5964	0.0344252	1.48903	0.984793	0.734274		O
NM_033362	MRPS12	chr19:39405903-39423659	5.14597	4.9776	5.82772	5.76398	5.72485	5.51042	0.734064					O
NM_003594	TTF2	chr1:117602948-117645491	3.66536	3.67649	4.40353	4.40642	3.54036	3.58727	0.734051
NM_015214	DDHD2	chr8:38089008-38120287	1.29664	1.87228	2.2575	2.37945	2.40761	2.38806	0.734018					O
NM_006709	EHMT2	chr6:31847536-31865464	2.93067	3.06562	3.75835	3.7056	3.29474	3.33508	0.733829
NM_002568	PABPC1	chr8:101715143-101734315	9.54566	9.45002	10.2251	10.2353	9.94949	9.99114	0.732368		O	O	O	O		O
NM_006355	TRIM38	chr6:25963070-25985352	3.24067	3.17112	3.9446	3.93128	3.85656	3.83937	0.732045
NM_001145144	SLC1A5	chr19:47278139-47291842	2.81827	3.03818	3.51377	3.80605	2.49722	2.72569	0.731683		O					O
NM_021932	RIC8A	chr11:208529-236362	4.56453	4.54996	5.28079	5.29547	5.33718	5.36126	0.73088		O
NM_002826	QSOX1	chr1:180123967-180169859	5.71161	5.55925	6.33398	6.39667	6.92277	6.85201	0.729897			O	O			O	O
NM_003953	MPZL1	chr1:167691186-167761156	3.90815	3.92652	4.65847	4.63575	4.83065	4.86436	0.729779					O		O	O
NM_001267576	USP43	chr17:9548853-9633003	0.567591	0.308383	1.12129	1.21424	0.968272	1.29751	0.729778
NM_173548	ZNF584	chr19:58920062-58929692	1.86117	2.00138	2.68158	2.64014	2.86751	2.92595	0.729586		O			O
NM_182977	NNT	chr5:43602790-43705668	3.5406	3.47227	4.23312	4.23807	3.32435	3.33491	0.729163
NM_130849	SLC39A4	chr8:145637797-145642273	3.18479	3.09882	3.94355	3.79796	3.48005	3.1302	0.728946
NM_198799	BCAS4	chr20:49411466-49493714	2.07449	2.56704	2.97072	3.12809	3.79719	3.71089	0.728639				O			O
NM_006024	TAX1BP1	chr7:27778991-27869386	2.92404	3.16431	3.74568	3.79887	3.89779	4.07016	0.728096			O	O				O
NM_001184743	PGBD1	chr6:28249313-28270326	0.383312	0.488548	1.06061	1.26662	1.46203	1.1581	0.727687					O
NM_001143948	ADTRP	chr6:11713887-11779280	0.119328	1.99668e-05	0.769724	0.80438	0.888254	0	0.727378		O	O	O			O	O
NM_016096	ZNF706	chr8:102209265-102218292	2.0756	2.15051	3.68281	1.99719	3.71682	2.61588	0.726944			O	O	O			O
NM_001143937	PSMA1	chr11:14526421-14665180	3.59307	3.3403	4.31796	4.06922	3.94714	3.68529	0.726908		O	O				O	O
NM_001081004	COMMD5	chr8:146075550-146078932	3.46657	3.67171	4.21918	4.3726	4.12662	4.07444	0.72675				O	O
NM_032410	HOOK3	chr8:42752032-42885682	1.94453	2.0327	2.76096	2.66942	2.72854	2.64234	0.726577			O		O			O
NM_001014795	ILK	chr11:6624963-6633475	0.37268	0.297896	1.00005	1.12336	0.462445	0.42719	0.726418
NM_022842	CDCP1	chr3:45123768-45187914	4.06502	4.10651	4.78559	4.83836	5.17699	5.19903	0.72621		O	O		O		O	O
NM_004651	USP11	chrX:47092313-47107727	3.19714	3.00552	3.81019	3.84487	3.5974	3.57566	0.726195			O			O		O
NM_000476	AK1	chr9:130628758-130640022	3.43955	3.40356	4.13071	4.16436	4.58699	4.63557	0.725982
NM_006377	UNC13B	chr9:35161988-35405332	2.14674	2.135	2.89635	2.83659	2.97768	2.95347	0.725603			O		O			O
NM_001548	IFIT1	chr10:91152321-91163744	1.85017	2.01563	2.635	2.68162	3.48242	3.65643	0.725403	O
NM_001256405	KDM2A	chr11:66886739-67025550	3.27082	3.53457	4.13959	4.11617	3.91553	3.83935	0.725184		O	O	O	O		O	O
NM_001018138	NME2	chr17:49230896-49249105	5.07559	5.19853	5.86459	5.85948	4.71867	4.96934	0.724975		O			O
NM_015189	EXOC6B	chr2:72406443-73053177	3.22408	3.20061	3.99159	3.88144	4.21405	4.29751	0.724169			O		O		O	O
NM_005238	ETS1	chr11:128328655-128457453	4.00968	4.03886	4.75136	4.7454	4.67443	4.61245	0.724112			O	O	O		O	O
NM_144600	FOPNL	chr16:15959576-15982447	5.88826	5.86979	6.60323	6.6018	6.08235	6.22832	0.723494								O
NM_005983	SKP2	chr5:36152144-36184142	4.31002	4.27181	5.02929	4.99948	4.45444	4.53399	0.72347
NM_001002880	CBY1	chr22:39052657-39069855	2.27529	2.17992	2.8962	3.00573	3.43159	3.61579	0.723359					O
NM_199351	ILDR2	chr1:166882440-166944561	0.0784087	0.0501701	0.771491	0.803789	1.44284	1.44131	0.723351			O				O	O
NM_001032394	GPR126	chr6:142623055-142767403	0.910839	1.216	1.84869	1.72394	2.06188	2.05454	0.7229		O	O	O	O			O
NM_017436	A4GALT	chr22:43088126-43116876	2.74849	2.56874	3.26689	3.49536	3.52177	3.56746	0.722511			O	O			O	O
NM_024719	GRTP1	chr13:113978504-114018463	2.6251	2.53566	3.3096	3.29542	2.87712	2.67109	0.722131		O			O		O
NM_001184904	CARD8	chr19:48711342-48761450	2.17529	1.95804	2.75532	2.82202	2.2402	2.60615	0.722004					O
NR_033323	NSUN5P2	chr7:72349935-72425302	1.86607	1.92281	2.81686	2.41595	2.97292	2.16166	0.721967				O			O
NR_024044	DEFB109P1	chr8:12219527-12268510	0	0	0	1.44375	0	0	0.721875
NM_005126	NR1D2	chr3:23986750-24022109	3.16813	3.17902	3.94618	3.84442	4.3884	4.27184	0.721724					O	O	O	O
NM_001242866	PRMT2	chr21:48055506-48085155	3.18134	3.30889	3.91995	4.01325	3.4447	3.49955	0.721487		O		O	O		O	O
NM_002869	RAB6A	chr11:73386682-73472201	3.95603	3.79304	4.48929	4.70265	4.53224	4.38728	0.721434		O			O		O
NM_182705	FAM101B	chr17:289770-295731	1.42019	1.54749	2.18051	2.22954	2.79297	2.75397	0.721185
NM_032283	ZDHHC18	chr1:27153200-27182211	3.71853	3.65262	4.36137	4.45209	4.57832	4.61379	0.721156							O
NM_001136223	RCOR3	chr1:211432707-211489725	0.00234495	0.277381	1.15878	0.562654	0.953536	0.00170048	0.720855	O	O			O		O	O
NM_001037171	ACOT9	chrX:23721776-23761407	3.46133	3.13521	4.00098	4.03727	3.69754	3.97766	0.720853							O
NM_003946	NOL3	chr16:67204404-67217883	2.50769	1.3063	2.57502	2.68044	2.71169	2.5135	0.720738
NM_080596	HIST1H2AH	chr6:27114907-27115346	0.874839	1.24864	1.60026	1.96469	1.33069	1.01189	0.720733					O
NM_178537	B4GALNT4	chr11:369794-382117	2.16399	2.22659	2.95166	2.88035	3.16441	2.88682	0.720714				O			O
NM_207014	WDR78	chr1:67278571-67390570	0.39666	0.642995	1.2622	1.21776	1.31171	1.49684	0.72015		O
NM_003942	RPS6KA4	chr11:64126624-64139687	4.01841	3.9119	4.64107	4.72925	4.45231	4.3362	0.720003		O		O
NM_005502	ABCA1	chr9:107543283-107690527	1.74156	1.80921	2.53727	2.45314	2.32735	2.2486	0.719818			O	O	O		O	O
NM_145306	C10orf35	chr10:71390002-71393355	3.02171	2.85984	3.5811	3.74	3.89681	3.80185	0.719777				O	O
NM_001007527	LMBRD2	chr5:36103413-36152015	3.8672	3.78665	4.6047	4.48824	4.66251	4.62775	0.719543					O
NM_002808	PSMD2	chr3:184017021-184026840	6.8205	6.83808	7.55398	7.54364	7.47508	7.43896	0.719519		O			O
NM_001198908	CCDC169	chr13:36742344-36871992	0.862989	0.635727	1.36238	1.57457	1.984	1.87633	0.719115
NM_001199861	KCNAB2	chr1:5922869-6161253	0.453509	0.529499	1.08113	1.3395	1.26063	1.4582	0.718808		O			O		O
NM_139021	MAPK15	chr8:144798506-144804633	0.369654	0.266559	1.14119	0.931581	1.42915	1.05891	0.718279					O
NM_024549	TCTN1	chr12:111051831-111127617	0.545586	0.157824	0.990873	1.14828	1.06934	1.03094	0.717873					O
NM_004688	NMI	chr2:152126981-152146430	3.9636	4.07795	4.71498	4.76219	3.33167	3.56595	0.717805		O
NM_006731	FKTN	chr9:108320410-108403399	0.894062	1.07583	1.65365	1.75147	1.87588	1.60478	0.71761			O	O	O		O	O
NM_001880	ATF2	chr2:175936977-176032934	2.60994	2.37904	3.22643	3.19769	3.19831	3.34992	0.71757		O			O
NM_006353	HMGN4	chr6:26538571-26547164	4.9525	4.89054	5.63476	5.64338	5.76577	5.88961	0.717554
NM_022833	FAM129B	chr9:130267617-130341268	6.12785	6.1348	6.74661	6.95064	6.90576	6.47772	0.717302
NR_015367	LOC550643	chrX:56755717-56844004	4.91252	4.81155	5.5904	5.56713	5.90197	5.94411	0.716728
NM_003860	BANF1	chr11:65764015-65771617	7.52952	7.4909	8.23111	8.22265	7.62291	7.7626	0.716664							O
NM_001085367	ZNF655	chr7:99156044-99174076	0.765203	0.356597	1.46409	1.09093	0.452354	0.832671	0.716611		O			O
NM_001006605	FAM69A	chr1:93297593-93427079	2.32801	2.26359	2.99757	3.02632	3.27883	3.4631	0.716147	O	O	O		O	O	O	O
NM_017881	NMRK1	chr9:77676115-77703133	1.94772	1.90046	2.64462	2.63572	2.9722	3.01084	0.716085				O	O		O
NM_018009	TAPBPL	chr12:6561176-6579843	3.30144	3.26217	3.91702	4.07798	3.13412	2.9162	0.715695		O
NM_020474	GALNT1	chr18:33234532-33291798	4.64591	4.6532	5.39324	5.33692	5.47376	5.58566	0.715521			O					O
NM_019863	F8	chrX:154064063-154250998	1.25027	1.23614	1.94439	1.97277	1.90911	1.89819	0.715374
NM_020792	NCEH1	chr3:172348434-172429008	3.10313	3.16482	3.89213	3.8062	4.17855	4.20945	0.715191			O	O	O		O	O
NM_033111	N4BP2L2	chr13:33006929-33112936	1.15753	1.03614	1.85799	1.76597	1.29049	1.35526	0.715144
NM_002824	PTMS	chr12:6875540-6880118	5.7301	5.71045	6.51029	6.36049	6.39076	6.20045	0.715112
NM_007224	NXPH4	chr12:57610577-57620232	2.86605	2.74684	3.59497	3.44707	3.72301	3.60626	0.714569
NR_038935	LOC100288846	chr14:39734475-39820397	1.19088	1.05233	1.9517	1.72059	1.24019	1.12052	0.714543
NM_002510	GPNMB	chr7:23286315-23314729	0.173431	0.255901	0.950856	0.907074	1.85321	1.63509	0.714299
NM_173462	PAPLN	chr14:73704204-73741347	1.11399	0.940933	1.74554	1.73687	2.13297	2.0558	0.71374			O	O			O	O
NM_001136136	RPL28	chr19:55897299-55903451	5.89718	5.67764	6.40906	6.59284	6.58141	5.4605	0.713543
NM_001284	AP3S1	chr5:115177618-115249778	5.15856	5.25815	5.92984	5.9139	6.17009	6.13909	0.713513					O
NM_014508	APOBEC3C	chr22:39410264-39414825	3.92301	3.88853	4.58179	4.65634	4.23151	4.48998	0.713296					O
NM_001100814	TMEM55B	chr14:20926011-20929637	3.15618	3.57085	4.02063	4.13208	4.05797	3.46074	0.712837		O			O
NM_019007	ARMCX6	chrX:100870107-100872991	2.79054	2.9119	3.63922	3.48831	3.72596	3.64279	0.712545	O	O
NM_003101	SOAT1	chr1:179262848-179327814	3.34597	3.32887	4.0413	4.05658	4.22111	4.21496	0.711524			O		O			O
NM_015946	PELO	chr5:52083773-52249485	4.1525	4.13085	4.83068	4.87491	5.01752	5.02904	0.711121			O	O				O
NM_153251	ZDHHC20	chr13:21872263-22033508	5.76479	5.72763	6.45517	6.45939	6.20475	6.02163	0.711071		O	O	O	O		O	O
NM_001199515	TGIF2	chr20:35201875-35274619	0.0639291	1.66142	1.52447	1.62184	1.15087	1.72986	0.710484		O			O		O
NM_139056	ADAMTS16	chr5:5140442-5320412	0.249408	0.231919	0.960417	0.941772	1.15089	1.16352	0.710431							O
NM_001265596	PFDN6	chr6:33257373-33258711	5.64191	5.74896	6.41773	6.39369	6.53592	6.73093	0.710271
NM_024682	TBC1D17	chr19:50380681-50392007	2.6767	2.61356	3.36189	3.3489	3.48391	3.55849	0.710263
NM_001127713	ATL1	chr14:50999799-51099784	0.625501	0.916773	1.55367	1.40867	2.12745	1.87085	0.710035		O		O	O			O
NM_002564	P2RY2	chr11:72929343-72947395	2.08469	1.74301	2.75933	2.48809	2.55421	1.80567	0.709861		O		O	O		O	O
NM_003336	UBE2A	chrX:118708498-118718379	5.64428	5.59351	6.31528	6.33965	5.92774	6.1	0.708567		O
NM_005482	PIGK	chr1:77554666-77685132	4.22557	4.1694	4.93625	4.87561	4.89812	5.02579	0.708442					O	O
NM_014950	ZBTB1	chr14:64971291-65000408	1.2073	1.23244	1.95627	1.90003	1.04106	0.980991	0.708284					O
NM_032775	KLHL22	chr22:20795805-20850170	2.69691	2.51322	3.2941	3.33234	3.19069	3.21408	0.708153		O	O
NM_001168724	TMEM135	chr11:86748885-87039876	0.137703	0.177297	0.914842	0.815869	0.632548	0.44902	0.707855			O	O			O	O
NM_001120	MFSD10	chr4:2932287-2936586	0.962046	1.62747	2.01458	1.99005	2.20619	1.39297	0.707561				O
NM_178014	TUBB	chr6:30688156-30693195	6.40361	6.31699	7.07604	7.05918	6.77577	6.70066	0.707307
NM_001257101	PCGF5	chr10:92922768-93044088	3.10252	2.97234	3.75876	3.73041	3.62672	3.55865	0.707153		O			O		O	O
NM_153704	TMEM67	chr8:94767071-94831460	1.22424	1.55448	2.1361	2.05651	2.31765	2.11849	0.706945					O		O	O
NM_017854	TMEM160	chr19:47549166-47551882	2.76932	2.84996	3.50871	3.5244	4.52021	3.56212	0.706915					O		O
NM_001193434	PLEKHS1	chr10:115511212-115542192	1.03422	0.700934	1.48233	1.66649	0.69266	0.694489	0.706835						O
NM_198830	ACLY	chr17:40023178-40075272	3.57397	3.44975	4.03053	4.40647	3.79964	4.18486	0.706638		O	O				O
NM_020216	RNPEP	chr1:201951765-201975275	4.5441	4.56313	5.23656	5.28362	5.15076	5.19863	0.706477					O
NM_014294	TRAM1	chr8:71485452-71520694	6.14828	6.06213	6.81858	6.80254	7.01057	6.98391	0.705356			O		O		O
NM_001039618	CREBZF	chr11:85368607-85376182	3.1303	3.04636	3.91115	3.67608	3.41258	3.12066	0.70528					O	O
NM_001258248	SP6	chr17:45922279-45933240	0.00218014	0.778981	1.32888	0.861562	1.76984	1.8141	0.704639					O		O
NM_001306	CLDN3	chr7:73183326-73184600	1.86105	1.56591	2.44967	2.38617	2.78135	2.36739	0.704438					O		O	O
NM_198965	PTHLH	chr12:28111016-28124916	1.13543	0.00596155	1.20972	1.34049	1.03296	2.08364	0.704412				O				O
NM_022491	SUDS3	chr12:118814357-118855840	4.45775	4.50655	5.21473	5.15687	5.25595	5.24704	0.703648					O
NM_000546	TP53	chr17:7571719-7606820	5.34872	5.34143	6.0812	6.01601	5.29426	5.35202	0.703532
NM_024693	ECHDC3	chr10:11784355-11806065	1.24273	1.29319	1.93949	2.00345	2.26578	2.39008	0.703511				O	O		O	O
NM_001261406	MPDZ	chr9:13105702-13279563	1.13571	1.13289	1.95032	1.72494	2.00313	1.98286	0.703335			O		O
NM_002691	POLD1	chr19:50887579-50921275	4.00077	4.00121	4.6634	4.74486	4.34451	4.20363	0.703141		O
NR_024334	LOC645431	chr14:65877309-66210839	2.83167	2.94711	3.56348	3.62148	2.60193	2.77254	0.703084
NM_182491	ZFAND2A	chr7:1192542-1199855	3.67417	3.70008	4.3732	4.40589	4.40363	4.43389	0.702417		O
NM_173665	KIAA0825	chr5:93486555-93954309	0.829062	0.67177	1.53925	1.36632	1.44602	1.69856	0.702368			O					O
NM_000424	KRT5	chr12:52908358-52914243	0.24542	0.257154	0.949648	0.956978	0.527636	0.534111	0.702026							O	O
NM_005285	NPBWR1	chr8:53852467-53853454	1.30644	1.15462	2.03345	1.83158	2.90591	2.23387	0.701988		O			O		O	O
NM_006770	MARCO	chr2:119699744-119752236	0.0301975	0	0.697466	0.735399	0.861226	0.72177	0.701334			O				O	O
NM_005773	ZNF256	chr19:58452200-58459077	0.713514	0.694224	1.34212	1.46822	1.39837	1.58314	0.701304
NM_000512	GALNS	chr16:88880141-88923374	1.65024	1.73999	2.36584	2.4266	2.51915	2.45675	0.701106
NR_028582	G6PC3	chr17:42148097-42153712	1.40295	1.85318	2.25286	2.40502	1.75361	1.93049	0.700878		O	O	O	O		O
NM_174936	PCSK9	chr1:55505148-55530526	2.16578	2.23268	2.89284	2.907	1.34974	1.32524	0.700686							O
NM_139157	ST5	chr11:8714898-8932498	2.80914	2.96553	3.60802	3.5668	3.15564	3.17379	0.700075			O	O			O	O
NM_019030	DHX29	chr5:54552072-54603521	3.12102	3.18586	3.86067	3.8461	3.67614	3.82809	0.699949			O
NM_003472	DEK	chr6:18224399-18264799	6.77521	6.84691	7.49812	7.52359	7.20429	7.16912	0.699797			O	O			O	O
NM_031412	GABARAPL1	chr12:10365488-10375724	4.43692	4.47821	5.11621	5.19764	5.81291	5.90058	0.699356		O				O
NM_006486	FBLN1	chr22:45898718-45997014	1.59539	1.59953	2.28005	2.31291	2.62051	2.41445	0.699019				O				O
NM_002780	PSG4	chr19:43696853-43709790	4.06953e-06	0	0.725492	0.671782	2.00928	2.27527	0.698635							O
NM_001010879	ZIK1	chr19:58095627-58103758	2.45694	2.56258	3.22768	3.18854	3.51454	3.71426	0.698354			O
NM_001109977	FAM160A1	chr4:152330397-152584784	1.41889	1.31518	2.12803	2.00262	1.67324	1.72832	0.698289			O				O	O
NM_207309	UAP1L1	chr9:139971952-139978990	1.52275	1.41052	2.09296	2.23688	2.22213	2.14613	0.698287
NM_024915	GRHL2	chr8:102504667-102681952	4.26953	4.22872	4.92798	4.96601	4.76678	4.80563	0.697871		O	O	O			O	O
NM_058192	RPUSD1	chr16:834973-838383	3.45648	3.49264	4.15346	4.19067	4.15584	3.92713	0.697506					O
NM_005157	ABL1	chr9:133589267-133763062	3.01417	3.20801	3.8492	3.76799	3.52825	3.58925	0.697505		O	O		O		O	O
NM_001166285	CCT7	chr2:73461363-73480150	0.98268	0.971832	1.75137	1.59811	1.30299	1.21551	0.697483		O
NM_005167	PPM1J	chr1:113252615-113257950	0.319577	0.196602	0.917946	0.993166	2.3869	2.37785	0.697466					O
NM_017708	FAM83E	chr19:49103856-49116694	0.156949	0.299057	0.896451	0.954304	0.62377	0.448732	0.697374
NM_001144034	TMEM25	chr11:118401802-118436791	0.000552423	0.000263501	1.3945	0.000763555	1.44873	0.604893	0.697225
NM_021216	ZNF71	chr19:57106663-57135544	1.94591	2.10737	2.67543	2.77216	3.30117	3.16939	0.697161					O
NM_001025205	AP2M1	chr3:183892633-183901879	6.84836	6.89067	7.57278	7.56016	7.51341	7.4957	0.696958		O
NM_133466	ZFP82	chr19:36882860-36909550	1.57492	1.43603	2.20126	2.20264	2.22217	2.49449	0.696476
NM_001100590	KIAA0232	chr4:6784458-6885899	2.39093	2.49045	3.09671	3.17667	3.14337	3.21481	0.696004		O	O		O		O
NM_178520	TMEM105	chr17:79285071-79304474	0.467845	0.399646	1.19284	1.06653	0.563633	0.641927	0.695942		O		O			O
NM_001167606	RAB35	chr12:120532898-120554643	0.870761	0.626985	1.46474	1.42434	1.31638	1.74544	0.695666	O			O			O	O
NM_000903	NQO1	chr16:69743303-69760533	7.05638	6.98639	7.6818	7.75159	7.75323	7.87763	0.695313			O					O
NM_014772	CTIF	chr18:46065426-46389586	0.986474	0.855436	1.56115	1.67104	2.1548	2.19712	0.695142			O		O		O
NM_032862	TIGD5	chr8:144680073-144682485	1.53056	1.69931	2.3081	2.31177	2.37085	2.22039	0.695003
NM_003789	TRADD	chr16:67188088-67193812	2.33094	2.43477	3.0293	3.12636	3.54872	3.36203	0.694977		O
NM_019032	ADAMTSL4	chr1:150521897-150533412	0.587218	0.402802	1.15579	1.22417	2.95638	2.73117	0.694969			O		O
NM_001012361	WDR31	chr9:116077930-116102620	0.562987	1.23162	1.49066	1.69343	1.68891	1.64002	0.69474		O					O
NM_004946	DOCK2	chr5:169064250-169510386	1.30584	1.30965	2.00208	2.0027	1.02373	1.0127	0.694641			O	O			O	O
NM_031244	SIRT5	chr6:13574760-13615390	1.29153	1.00256	1.81684	1.86586	1.67479	1.78652	0.694306
NM_013397	PRICKLE4	chr6:41748499-41755110	0.290897	0.444038	1.06493	1.05834	1.5109	1.22103	0.69417					O
NM_152787	TAB3	chrX:30845558-30907511	2.49702	2.6032	3.27007	3.21674	3.33519	3.36264	0.693293			O		O			O
NM_002960	S100A3	chr1:153519808-153521734	4.49671	4.55497	5.18249	5.25576	4.3447	4.16972	0.69329
NM_016373	WWOX	chr16:78133326-79246564	1.74572	1.64357	2.36179	2.41328	2.42481	2.36831	0.692886		O	O		O		O	O
NM_001005271	CHD3	chr17:7788122-7816075	4.34421	4.52013	5.14799	5.10129	4.29705	4.18059	0.69247		O			O		O
NM_033238	PML	chr15:74287013-74340155	1.29406	1.31072	1.97177	2.01735	1.62031	1.65006	0.692169
NM_130787	AP2A1	chr19:50270179-50316567	4.36083	4.41533	5.06308	5.09618	5.30955	5.22099	0.691554
NM_001002027	ATP5G1	chr17:46970147-46973232	7.54601	7.4788	8.21981	8.18799	7.99476	8.22161	0.691488			O				O
NM_207294	MBNL1	chr3:151980404-152183569	0.222636	0.313887	1.39172	0.527766	0.315997	0	0.691483		O			O			O
NM_021999	ITM2B	chr13:48807273-48836232	6.44283	6.40703	7.06421	7.16821	7.2651	7.30334	0.691282			O		O		O	O
NM_032906	PIGY	chr4:89442134-89444955	5.51578	5.57056	6.16288	6.30598	6.26185	6.30838	0.691261								O
NM_001170938	ISYNA1	chr19:18530145-18549111	0	0	0.271992	1.10965	0	0	0.69082				O	O
NR_026052	MGC2752	chr19:59086765-59095762	3.12474	3.15932	3.80438	3.8611	3.78577	3.83444	0.690712
NM_173793	C22orf39	chr22:19428409-19435755	2.59635	2.33817	3.23398	3.07982	2.79729	2.81052	0.689644					O
NM_005209	CRYBA2	chr2:219854911-219858127	0	0.0990105	0.73518	0.742906	0.272183	0.171504	0.689538
NM_001134479	LRRC8D	chr1:90286572-90401989	3.20066	3.31646	3.94758	3.94792	3.6299	3.63063	0.689191			O	O	O		O	O
NM_014547	TMOD3	chr15:52121824-52204331	5.58212	5.59628	6.26807	6.28841	6.36421	6.34403	0.689043		O		O				O
NM_001001668	ZNF470	chr19:57078889-57094262	0.823485	0.781696	1.46342	1.51858	1.64565	1.67826	0.688411					O
NM_016297	PCYOX1	chr2:70485230-70508317	3.41478	3.48229	4.13879	4.13296	3.94817	3.99333	0.687335					O
NM_016647	THEM6	chr8:143808620-143818350	3.76955	3.7705	4.42909	4.48509	4.64181	4.57472	0.687061					O
NM_001004065	AKAP2	chr9:112403067-112934791	3.13819	3.10753	3.90882	3.71045	4.63502	4.36887	0.686776	O		O		O		O	O
NM_001710	CFB	chr6:31913720-31919861	5.20334	5.15856	5.84847	5.88663	5.31831	5.30262	0.6866
NM_020127	TUFT1	chr1:151512780-151556059	5.3309	5.42207	6.11647	6.0095	6.77078	6.79526	0.686497		O					O
NM_032857	LACTB	chr15:63413998-63434260	1.79523	1.79552	2.47573	2.4875	2.89546	2.87712	0.686241		O	O		O		O
NM_001145028	PALM3	chr19:14164178-14169971	0.464527	0.491205	1.18566	1.14229	1.09688	1.08217	0.686107							O
NM_152387	KCTD18	chr2:201353683-201374792	2.20843	2.15102	2.85484	2.87622	3.05381	3.06472	0.685808		O	O		O		O	O
NM_002884	RAP1A	chr1:112162404-112256101	4.73152	4.75767	5.36612	5.49436	5.47546	5.68826	0.685648	O				O
NM_005312	RAPGEF1	chr9:134452156-134612925	3.06992	3.14108	3.78984	3.79155	3.97439	3.88678	0.685195				O			O
NM_025103	IFT74	chr9:26903367-27062931	1.78776	2.09637	2.60048	2.65325	2.44879	2.60623	0.684798					O			O
NM_198897	FIBP	chr11:65647283-65656010	2.97909	2.8227	3.60948	3.56188	3.39491	3.10064	0.684782
NM_001128217	PSIP1	chr9:15464064-15511003	2.37472	3.0265	3.76009	3.00994	3.85177	3.76476	0.684412					O
NR_003930	LOC387647	chr10:29698500-29711299	1.93179	1.76676	2.52133	2.54583	2.55105	2.7392	0.684306
NM_015960	CUTC	chr10:101419262-101515894	3.79301	3.93661	4.50115	4.59672	4.44637	4.67047	0.684126			O					O
NR_002803	RPL13P5	chr12:6993144-6993768	1.59134	1.79582	2.28762	2.46759	1.77943	2.26227	0.684025							O
NM_005765	ATP6AP2	chrX:40440215-40465888	5.26702	5.29188	5.96075	5.96619	6.30281	6.35194	0.684019						O
NM_014754	PTDSS1	chr8:97274166-97346774	4.45338	4.44824	5.14813	5.1212	4.88929	4.8961	0.683854					O		O	O
NM_001244815	FOXP1	chr3:71003864-71633140	2.53723	2.40719	3.08717	3.22477	2.99661	2.88888	0.683753			O	O		O	O	O
NM_058246	DNAJB6	chr7:157129709-157210133	4.16197	4.15216	4.83378	4.84756	5.01642	4.98276	0.683602		O		O
NM_000418	IL4R	chr16:27325229-27376099	2.84501	2.71723	3.41797	3.51077	2.55224	2.81074	0.683251		O			O
NM_006807	CBX1	chr17:46147413-46178883	1.62499	1.58222	2.11624	2.45636	1.80685	1.89809	0.682694		O		O	O
NM_001114393	PAPD4	chr5:78908242-78982471	1.97747	1.71308	2.50642	2.54886	2.20177	2.16885	0.682365			O				O	O
NM_018122	DARS2	chr1:173793796-173827682	3.7066	3.66373	4.3721	4.36274	4.37616	4.50413	0.682255		O
NM_015114	ANKLE2	chr12:133302253-133338451	4.0318	4.00794	4.72652	4.67772	4.3569	4.34418	0.682248		O
NM_012176	FBXO4	chr5:41925355-41941672	2.79541	2.73319	3.43089	3.46197	3.40983	3.63946	0.682132		O
NM_025237	SOST	chr17:41831098-41836156	0	0	0.708766	0.655487	0.609251	0.924779	0.682126	O		O	O			O	O
NM_147128	ZNRF2	chr7:30323922-30407308	3.15117	3.34456	3.89016	3.96945	3.95622	3.95868	0.681945			O		O			O
NM_207291	USF2	chr19:35759895-35770718	2.92475	2.97189	3.7517	3.50878	2.52167	2.94771	0.68192					O
NM_014216	ITPK1	chr14:93403258-93582263	4.00083	4.03854	4.69272	4.70945	4.84836	4.73435	0.681401		O	O		O
NM_018972	GDAP1	chr8:75262617-75279335	2.66679	2.66708	3.31032	3.38624	4.35868	4.32542	0.681339
NM_020898	CALCOCO1	chr12:54104901-54121307	2.60977	2.57312	3.33983	3.20489	3.96319	4.03988	0.680917
NM_001099439	EPHA10	chr1:38181645-38230824	0.364272	0.372795	1.02612	1.07237	1.23148	1.38158	0.68071					O		O
NM_003075	SMARCC2	chr12:56555635-56583351	3.99642	3.82401	4.66312	4.51867	4.1245	4.06595	0.680675		O
NM_006089	SCML2	chrX:18257432-18372844	0.425176	0.453596	1.17115	1.06787	1.06468	1.1926	0.680125
NR_002182	NACAP1	chr8:102381120-102381823	0.0561081	0.204078	0.729292	0.890713	0.263301	0.492489	0.679909	O		O	O			O	O
NM_198973	MKNK1	chr1:47004367-47069966	2.38803	2.61517	3.19393	3.16895	3.41019	3.2292	0.679843		O			O
NM_001204263	NR3C1	chr5:142657495-142815077	1.30125	1.69048	2.07163	2.27934	1.96591	2.10504	0.679622		O	O	O			O	O
NR_038429	LOC100506054	chr2:3605975-3609340	1.46239	1.53075	2.14849	2.2035	1.88417	2.01589	0.679423
NM_012089	ABCB10	chr1:229652328-229694442	2.00361	2.04304	2.62654	2.77815	2.54103	2.32487	0.679023	O	O		O	O
NM_015058	KIAA0564	chr13:42140960-42535221	1.88251	1.91245	2.55646	2.59653	2.54662	2.5754	0.679011
NM_007066	PKIG	chr20:43160435-43247678	2.16208	2.11189	2.75695	2.87407	3.19965	3.24796	0.678528			O				O
NM_014241	PTPLA	chr10:17631957-17659373	1.5744	1.49536	2.26103	2.16577	1.85869	1.8225	0.678524					O
NM_152392	AHSA2	chr2:61404554-61697849	2.44891	2.13569	3.24625	2.69489	2.38558	1.71024	0.678267		O			O		O	O
NM_005452	WDR46	chr6:33246879-33257304	3.80018	3.73185	4.47194	4.41606	4.44479	4.38534	0.677988
NM_000235	LIPA	chr10:90973325-91011660	4.99943	5.01039	5.65447	5.71079	6.38279	6.57088	0.677718					O
NM_020225	STOX2	chr4:184826508-184938875	0.38758	0.390673	1.13597	0.996787	0.831868	0.883948	0.677251			O	O	O		O	O
NM_014290	TDRD7	chr9:100174301-100258405	2.81345	2.81954	3.46352	3.52376	3.46867	3.49686	0.677146	O				O
NM_001142568	BBX	chr3:107241782-107530049	3.42983	3.32337	4.06014	4.04732	4.02273	4.15919	0.67713			O	O	O		O	O
NM_017411	SMN2	chr5:69345349-69373422	0.122104	0.074039	0.0354373	1.51407	0.435275	0.0284097	0.676683
NM_020385	REXO4	chr9:136243283-136324508	3.80022	3.79655	4.40654	4.54308	4.48229	4.46439	0.676431					O
NM_003821	RIPK2	chr8:90769974-90803292	3.05708	2.98949	3.7163	3.68211	3.84126	3.87003	0.675923			O	O	O		O	O
NM_007084	SOX21	chr13:95361878-95364389	2.31416	2.37818	2.94326	3.10004	2.15382	2.12995	0.675483		O			O
NR_036510	UROD	chr1:45477804-45481341	1.47567	1.51703	2.1619	2.18107	2.2735	1.82293	0.675139				O
NM_001165252	LOC730755	chr17:39215492-39216344	0.863229	0.920333	1.45507	1.67804	4.36062	4.56675	0.674774
NM_001145256	IRAK4	chr12:44152746-44183346	0.563575	0.722247	1.0866	1.54872	0.747712	0.790547	0.674748
NR_037591	AK2	chr1:33473540-33502512	1.29024	0.0351468	1.19348	1.48107	1.32977	1.47306	0.674582		O		O			O
NM_001014279	ANXA2R	chr5:43039181-43040447	1.00928	0.886084	1.66211	1.58235	1.95278	1.9826	0.674554
NM_001355	DDT	chr22:24309025-24322019	1.17044	1.4504	2.30931	1.66054	1.63136	2.27225	0.674505
NM_001244992	PPP1R12A	chr12:80167342-80329235	2.38598	2.46417	3.21312	2.98533	2.96055	3.1213	0.674149		O	O		O		O	O
NM_001136025	PLS3	chrX:114795176-114885179	5.00198	4.96403	5.68342	5.63029	4.59078	4.542	0.673852			O	O		O	O	O
NM_024660	IGFLR1	chr19:36230150-36233351	2.15883	2.0703	2.86613	2.71039	2.11405	2.06904	0.673695
NM_021009	UBC	chr12:125396191-125399587	8.15307	8.2088	8.89381	8.81503	8.6343	8.47566	0.673486		O					O
NM_006379	SEMA3C	chr7:80371853-80548667	4.09173	4.13311	4.7926	4.77877	4.83407	4.8604	0.673258			O	O		O	O	O
NM_015187	SEL1L3	chr4:25749048-25864610	4.32837	4.28276	4.96601	4.99157	4.71653	4.75469	0.673222						O	O	O
NR_038969	LOC100506599	chr9:138354564-138364095	0.493026	0.489242	1.1613	1.16726	0.628802	0.584466	0.673144
NM_002341	LTB	chr6:31548335-31550202	3.95085	3.85992	4.47838	4.67858	3.7676	3.55046	0.673098
NM_001199672	CALU	chr7:128379345-128415844	0.660205	0.000706202	0.988619	1.01789	1.05521	1.50828	0.6728		O					O
NM_001011649	CDK5RAP2	chr9:123151146-123342437	1.57524	1.9886	2.61818	2.29118	2.42112	2.0826	0.672758		O	O		O
NM_007277	EXOC3	chr5:443333-467409	4.59571	4.53366	5.24245	5.23234	5.18116	5.19566	0.672711		O
NM_201397	GPX1	chr3:49394608-49395791	0.93822	0.575963	1.68631	1.17301	1.74571	1.41383	0.672565		O	O					O
NM_024648	C17orf101	chr17:80347085-80408707	1.68823	1.75059	2.56599	2.21669	2.25758	2.05957	0.671929
NM_002383	MAZ	chr16:29817854-29822504	4.43598	4.42426	5.06148	5.14065	4.42416	4.36905	0.670946		O			O
NR_040089	LOC100506713	chr17:6888441-6915653	1.13301	1.49212	2.16608	1.80034	2.29509	2.09374	0.670643
NM_203403	LURAP1L	chr9:12775011-12823059	1.88504	2.02122	2.52185	2.72567	2.34884	2.53714	0.67063		O		O				O
NM_020824	ARHGAP21	chr10:24872537-25012597	2.40913	2.44881	3.07565	3.12339	2.98965	3.01558	0.670552		O	O		O		O	O
NM_015327	SMG5	chr1:156219014-156252620	4.15124	4.19072	4.83274	4.84854	4.48746	4.44552	0.669663		O
NM_003214	TEAD3	chr6:35441373-35464861	3.00067	2.91084	3.64439	3.60544	3.13986	3.21639	0.669153		O		O	O		O
NM_033393	FHDC1	chr4:153864134-153900848	2.21412	2.22349	2.90911	2.86653	2.82088	2.85954	0.669014			O	O			O	O
NM_023079	UBE2Z	chr17:46985730-47006422	5.2027	5.24273	5.84656	5.93655	5.66504	5.68133	0.668836		O			O
NM_052901	SLC25A25	chr9:130830478-130871524	3.54509	3.44279	4.17178	4.15348	3.88319	4.04453	0.668692								O
NM_001134776	KLC2	chr11:66024764-66035332	1.84749	1.36103	1.98464	2.56106	0.800594	1.62264	0.668592		O			O		O	O
NM_005226	S1PR3	chr9:91605777-91620069	2.09445	2.13412	2.79484	2.7709	2.90042	3.0192	0.668588					O			O
NR_040087	SETD4	chr21:37406838-37432819	0.000125044	0.161523	0.482359	1.01591	0.28684	0	0.668311		O			O
NM_001013659	ZNF793	chr19:37997840-38034239	1.25831	1.25291	1.94755	1.9	1.74452	1.56827	0.668169
NR_024188	PPP1R21	chr2:48667907-48742531	1.47337	1.17691	1.96492	2.02102	1.79862	1.59514	0.66783		O				O	O
NM_004642	CDK2AP1	chr12:123745539-123756687	6.27523	6.30385	6.92373	6.99091	6.07824	6.05241	0.667782				O	O
NM_001267547	ARFRP1	chr20:62289162-62367494	2.38044	1.97971	2.95971	2.73588	2.7126	2.82644	0.66772
NM_001242412	AHRR	chr5:271735-438405	0.722419	0.647735	1.43105	1.27422	1.35222	1.23967	0.667555				O			O
NM_001003398	BICD1	chr12:32260184-32531141	1.46372	1.3823	2.22514	1.9557	1.53106	1.77308	0.667407	O		O		O	O	O	O
NM_024686	TTLL7	chr1:84259597-84464833	0.977009	0.95131	1.65557	1.60739	2.39408	2.58959	0.667319					O
NM_024830	LPCAT1	chr5:1461541-1524076	6.40768	6.40753	7.02569	7.12282	6.41569	6.38471	0.66665		O		O	O		O
NR_033341	LOC100379224	chr19:44598481-44617336	1.78077	1.64176	2.46515	2.29052	2.36205	2.36521	0.666569					O
NM_020214	PARP6	chr15:72533521-72563628	2.85066	2.92646	3.5869	3.52258	3.2664	3.23241	0.666181		O			O
NM_153321	PMP22	chr17:15133095-15168644	0	0.741671	1.42986	0.642973	1.54237	1.31012	0.665582		O		O
NM_014478	CRCP	chr7:65579804-65619553	4.18057	4.19687	4.84176	4.86681	4.90535	4.8965	0.665561		O	O	O			O
NM_031461	CRISPLD1	chr8:75896707-75946793	1.77429	1.77053	2.46543	2.41019	2.69672	2.68305	0.665403		O			O		O
NM_005537	ING1	chr13:111364969-111373421	0.988245	1.1254	1.71612	1.72811	1.98646	1.68243	0.665294
NM_001242318	PDE7A	chr8:66626568-66753969	2.50855	2.45526	3.1777	3.11652	3.0268	2.99479	0.665204			O				O	O
NM_001163315	FBXL17	chr5:107194733-107717799	3.26595	3.20774	3.91396	3.88974	3.33697	3.34361	0.665004		O	O	O	O			O
NM_033446	FAM125B	chr9:129089122-129269320	1.35028	1.42309	2.08462	2.01837	1.40207	1.48467	0.664811
NM_033257	DGCR6L	chr22:20301760-20307628	3.75401	3.81104	4.40398	4.49013	4.32232	4.24621	0.66453					O		O
NM_021963	NAP1L2	chrX:72432136-72434710	0.544417	0.644728	1.32527	1.19182	2.08463	1.96109	0.66397
NM_033512	TSPYL5	chr8:98285713-98290176	3.50554	3.47584	4.13986	4.16928	4.50292	4.49417	0.663887		O	O		O			O
NM_023923	PHACTR4	chr1:28696092-28826881	1.67069	1.41127	2.37107	2.03848	2.32622	2.00425	0.663791		O			O	O	O	O
NM_001257397	UBE2V1	chr20:48697660-48770335	0.294906	0.229454	0.827802	1.02362	1.26391	1.16217	0.66353		O
NM_030974	SHARPIN	chr8:145153535-145159140	3.8812	4.05178	4.57379	4.68541	4.69676	4.75574	0.663107					O
NM_025058	TRIM46	chr1:155146262-155157447	0.00224212	0.386007	0.798677	0.914529	1.38398	0.652992	0.662478			O
NM_001127207	SMARCAL1	chr2:217277136-217347774	1.44405	1.29202	1.99253	2.06782	2.15734	1.99706	0.66214		O			O		O
NR_046285	LOC100130744	chr5:14704908-14871887	1.74057	1.76482	2.46928	2.35884	2.3809	2.3141	0.661362			O		O		O
NR_036496	LOC339803	chr2:61368726-61372110	1.62903	1.66069	2.27241	2.33992	2.3829	2.50283	0.661303					O
NM_002547	OPHN1	chrX:67262185-67653299	1.59594	1.60538	2.29813	2.22554	2.38562	2.33571	0.66118				O	O		O
NM_001735	C5	chr9:123714613-123812554	0.495294	0.428208	1.18507	1.06044	1.05553	1.09768	0.661004
NM_013352	DSE	chr6:116601282-116759442	2.96381	3.09037	3.73638	3.63975	3.74913	3.78591	0.660975		O			O			O
NM_031288	INO80B	chr2:74682149-74688018	4.41835	4.2411	4.95254	5.02875	5.29537	5.40104	0.660921
NM_022773	LMF1	chr16:903634-1031318	0.00331125	0.229448	0.710577	0.843486	0.625516	0.988351	0.660652		O		O	O		O
NM_019108	SMG9	chr19:44235300-44259142	3.15722	3.03685	3.78264	3.7322	3.19542	3.2852	0.660387		O		O			O
NM_153013	NADKD1	chr5:36192693-36242258	3.27459	3.17523	3.88336	3.88657	3.57407	3.47733	0.660052
NM_001256689	MELK	chr9:36572858-36677680	3.36985	3.31347	4.02494	3.97842	3.73341	3.79151	0.660024		O	O				O	O
NM_001135599	TGFB2	chr1:218517537-218617961	3.39404e-05	0.130259	0.97575	0.473778	0.593625	0.448516	0.659618			O					O
NM_019072	SGTB	chr5:64920557-65017941	2.10865	2.09718	2.77779	2.74612	3.63529	3.61737	0.659038					O
NM_001099653	FAM86C1	chr11:71498556-71512280	0.64982	0.442438	1.39539	1.01387	1.51011	1.66019	0.658502					O		O
NM_004913	C16orf7	chr16:89773540-89883065	1.26392	1.22066	1.89774	1.90365	2.17102	1.97946	0.6584
NM_016422	RNF141	chr11:10533224-10562774	4.35971	4.3574	5.0033	5.03055	5.36335	5.38748	0.658365				O	O
NM_001134369	LRRFIP2	chr3:37094116-37217851	2.64901	2.84956	3.49008	3.32454	3.36478	3.37349	0.658026		O	O	O	O	O
NM_003492	TMEM187	chrX:153237990-153248646	2.79368	2.65586	3.35553	3.40951	3.4033	3.18728	0.657746
NM_001146289	LEPRE1	chr1:43212005-43232755	0.900723	0.626176	1.36606	1.47466	1.2743	1.45071	0.656911					O		O
NM_152334	TARSL2	chr15:102193954-102264645	0.851855	1.01923	1.57085	1.61203	1.76437	1.82431	0.655893	O				O
NR_024080	ACP1	chr2:264868-278282	2.34993	2.38284	2.91452	3.12926	3.0863	2.9712	0.655506		O
NM_206966	C5orf46	chr5:147272270-147286101	0	0.0933774	0.588853	0.81531	1.1557	0.866307	0.655393								O
NM_004808	NMT2	chr10:15147770-15210695	1.00174	0.960822	1.6508	1.62175	2.03788	2.19671	0.654994			O		O		O
NM_175866	UHMK1	chr1:162466963-162499419	3.2896	3.0386	3.93486	3.70321	4.1694	3.51408	0.654935		O			O			O
NM_018916	PCDHGA3	chr5:140710251-140892548	0.580685	0.343077	1.08347	1.14999	1.07321	0.582046	0.654852
NM_023067	FOXL2	chr3:138663065-138665982	0.121619	0.0766438	0.730896	0.776231	0.690759	0.650293	0.654432					O
NR_040252	ANKS3	chr16:4746510-4799397	0.875134	0.513597	1.25891	1.43826	1.10576	1.18338	0.654221		O			O		O
NM_198428	BBS9	chr7:33169151-33645680	2.13212	2.18154	2.77404	2.84801	3.22276	3.18267	0.654197			O		O			O
NM_017458	MVP	chr16:29827527-29859360	2.83647	2.47579	3.35591	3.26426	3.47542	3.28878	0.653953		O		O
NM_001164773	BCAT2	chr19:49298318-49314320	2.35365	1.98856	2.91069	2.73919	2.32261	2.27726	0.653835							O
NM_033088	FAM40A	chr1:110577240-110597263	3.17111	3.13063	3.7848	3.82448	3.5175	3.40339	0.653767
NM_020202	NIT2	chr3:100053561-100074478	5.29788	5.23243	5.8694	5.96743	5.68615	5.88488	0.65326							O
NM_152412	ZNF572	chr8:125985538-125991630	0.0408548	0.039073	0.707852	0.677978	0.793342	1.05186	0.652951	O		O
NM_003275	TMOD1	chr9:100263461-100436029	0.567586	0.833948	1.33011	1.37617	0.779457	1.20242	0.652372			O	O				O
NM_005438	FOSL1	chr11:65659691-65667997	3.93786	3.94787	4.61625	4.57362	4.42513	4.18057	0.652067
NM_017588	WDR5	chr9:137001209-137025094	3.05063	2.79652	3.45197	3.69874	3.05579	2.77441	0.651784					O
NR_026662	FAM222A-AS1	chr12:110152186-110211292	0.0334155	0	0.637981	0.697819	0.35877	0.210239	0.651192					O		O
NM_001042610	DBNDD1	chr16:90071278-90085937	1.57196	1.80363	2.3061	2.37139	2.44402	2.03997	0.650951
NM_001988	EVPL	chr17:74002926-74023507	2.83345	2.77456	3.49525	3.41447	2.93589	2.72916	0.650852		O	O
NM_001251984	RCAN3	chr1:24822822-24863510	0.000217463	0	0.455116	0.846704	0	0.00427115	0.650801		O			O
NM_003951	SLC25A14	chrX:129474046-129507335	2.29863	0.0161848	1.03685	2.57931	1.58856	2.52998	0.650675		O
NM_001077206	SEC31A	chr4:83739813-83812419	1.27922	1.20552	1.86478	1.92056	1.8243	1.94678	0.650298		O	O				O	O
NM_003878	GGH	chr8:63927638-63951610	5.77439	5.76105	6.43104	6.40415	6.63709	6.67316	0.649877	O
NM_182913	SYNE2	chr14:64319682-64693167	0.317819	0.757063	1.05284	1.32006	1.35178	1.26725	0.649011			O	O	O		O	O
NM_004360	CDH1	chr16:68771194-68869444	6.02514	6.01415	6.65572	6.68151	7.07755	7.17217	0.648966				O			O	O
NM_006423	RABAC1	chr19:42460832-42463528	6.08768	6.08086	6.82819	6.63818	7.15274	6.73498	0.648915		O			O		O
NM_001127649	PEX26	chr22:18560685-18573797	0	0.939948	1.42501	0.811954	1.01563	1.52498	0.64851				O	O		O
NM_014673	EMC2	chr8:109455852-109499136	5.58958	5.60341	6.2488	6.24044	6.02018	6.09199	0.648121			O	O			O	O
NM_012281	KCND2	chr7:119913721-120390387	0.175091	0.184525	0.793942	0.861864	1.10821	1.14237	0.648095			O					O
NM_017449	EPHB2	chr1:23037330-23241823	3.70911	3.62568	4.24403	4.38681	4.17417	4.19242	0.648026					O		O
NM_014282	HABP4	chr9:99212413-99253618	1.26864	1.39289	2.01198	1.94531	2.58298	2.68633	0.647882					O
NR_040586	STAG3L4	chr7:66767624-66786513	3.15394	2.92312	3.77485	3.59751	3.29541	3.24446	0.647647
NM_024779	PIP4K2C	chr12:57984941-57997211	4.44486	4.33677	5.09284	4.98346	5.35289	5.41918	0.647334
NM_001017998	GNG10	chr9:114393631-114432526	6.19514	6.2213	6.79526	6.91442	7.36602	7.40549	0.646622					O
NM_001193362	EXD2	chr14:69658193-69710737	0.483104	0.60097	1.09841	1.27853	1.57459	1.66384	0.646429		O			O
NR_037929	SLMO2-ATP5E	chr20:57603732-57617901	4.34329	3.90834	4.76002	4.78345	4.91453	5.61355	0.64592		O			O
NM_177974	CASC4	chr15:44580908-44707959	3.66426	3.58721	4.27503	4.26825	4.27322	4.49804	0.645906					O			O
NM_052845	MMAB	chr12:109991520-110011358	2.94359	2.86375	3.55616	3.54248	2.73024	2.85264	0.645653		O					O
NM_198309	TTC8	chr14:89290977-89344335	2.67657	2.51771	3.21824	3.26575	2.829	3.04875	0.644856				O	O		O
NM_006570	RRAGA	chr9:19049371-19051021	4.14389	4.2158	4.83348	4.81581	4.83613	4.80337	0.644801
NM_183243	IMPDH1	chr7:128032330-128050036	0.785317	0.155432	0.73809	1.4921	1.87456	1.1647	0.644723					O
NM_001199260	TOR1AIP2	chr1:179809101-179846941	2.12939	1.9485	2.70394	2.66327	2.61166	2.47911	0.644661						O	O
NM_004381	ATF6B	chr6:32083044-32096017	4.36571	4.35052	5.0514	4.95396	4.83087	4.64915	0.644565		O
NM_003122	SPINK1	chr5:147204142-147211260	0.298208	0.810652	1.43312	0.964703	1.30228	1.68397	0.644482								O
NM_001174087	NCOA3	chr20:46130600-46285621	1.59078	2.19176	2.58651	2.48479	2.9802	2.63947	0.644376			O		O		O	O
NM_022443	MLF1	chr3:158288952-158324249	2.9079	3.00308	3.59034	3.60909	5.04909	5.25752	0.644224
NM_001033719	ZNF404	chr19:44376514-44384288	0.399716	0.411195	1.15581	0.943136	1.12755	0.826972	0.644019
NM_018710	TMEM55A	chr8:92006501-92053203	1.01775	1.04031	1.63363	1.71227	2.08874	1.93331	0.643915	O				O
NM_001144068	ZNF772	chr19:57980953-57988938	1.85122	1.80047	2.51358	2.42429	2.34727	2.29768	0.643095					O
NM_153838	GPR115	chr6:47666288-47689757	2.38297	2.45287	3.06967	3.05185	2.59269	2.74821	0.642837						O
NR_003500	RP9P	chr7:32956426-32982782	0.70227	0.576111	1.24001	1.32378	1.18824	0.944704	0.642704	O	O			O			O
NR_046308	TSPO	chr22:43547519-43559248	2.97099	2.98927	3.36065	3.88492	3.72707	4.03133	0.642658		O			O
NM_001017524	SIRT3	chr11:208529-236362	1.41905	1.2664	1.96848	2.00205	1.00646	1.51371	0.642534
NM_020662	MRS2	chr6:24403152-24425816	3.50472	3.52064	4.16094	4.14801	4.35369	4.39998	0.641801		O			O
NM_016618	KRCC1	chr2:88326723-88355248	4.02346	4.03883	4.6515	4.69404	4.00517	4.10662	0.641627		O					O
NM_002224	ITPR3	chr6:33589155-33664348	4.00657	4.03577	4.68154	4.64337	4.51598	4.36736	0.641288		O	O				O
NM_001136530	SERPINE2	chr2:224839764-224904036	0.00109305	0.0004789	0	1.28384	0.524863	0	0.641133				O	O		O	O
NM_020954	RNF213	chr17:78234659-78411884	0.590552	0.509284	1.25389	1.12725	1.83596	1.8799	0.64065		O	O		O		O
NM_175887	PRR15	chr7:29603426-29606911	2.86253	2.83735	3.52236	3.45868	2.67723	2.78396	0.640579		O			O
NM_020197	SMYD2	chr1:214454564-214510477	3.49029	3.68398	4.21321	4.24176	3.72146	3.88835	0.640353		O	O	O	O		O	O
NM_001172568	MYD88	chr3:38179968-38184512	0.876006	0.873891	1.23819	1.79235	0.586888	1.73785	0.640324			O
NM_001100829	TMEM170B	chr6:11538510-11583757	1.07665	1.12996	1.80788	1.67917	2.26203	2.26551	0.640225			O		O		O	O
NM_024901	DENND2D	chr1:111729800-111743281	3.12498	3.09744	3.75035	3.75247	3.32563	3.405	0.6402		O			O			O
NM_000067	CA2	chr8:86376130-86393721	1.48701	1.31639	2.04008	2.04309	2.12475	2.20912	0.639882					O
NM_001001795	C8orf82	chr8:145743362-145754458	2.94993	2.99688	3.65883	3.56755	3.18473	3.07688	0.639784		O			O		O
NM_020905	RDH14	chr2:18735988-18770846	3.47182	3.60851	4.13923	4.21915	4.06351	4.09732	0.63902			O		O		O	O
NM_001100912	BEND7	chr10:13480483-13544976	0.584321	0.676014	1.24401	1.29394	1.0343	0.896465	0.638806			O
NM_025076	UXS1	chr2:106709758-106810795	4.46435	4.50767	5.0774	5.17206	4.96674	4.97428	0.638715			O		O		O	O
NM_033055	HIAT1	chr1:100503788-100548929	4.54984	4.53988	5.18658	5.18014	4.81126	4.9263	0.638507			O		O		O	O
NM_003435	ZNF134	chr19:58125829-58133636	2.76597	2.8542	3.39852	3.49761	3.66584	3.81671	0.63798					O
NM_003634	NIPSNAP1	chr22:29950797-29977326	5.20818	5.13243	5.89803	5.7175	6.32343	5.89776	0.637459		O			O
NM_001199341	RPL17	chr18:47007547-47018935	5.34744	5.45365	5.91626	6.15973	5.49476	5.67937	0.637452
NM_012302	LPHN2	chr1:82266081-82458107	2.48521	2.42249	3.13734	3.04506	3.33731	3.49746	0.637352	O		O	O		O	O	O
NM_203500	KEAP1	chr19:10596795-10614054	3.25096	3.58319	4.01447	4.09422	3.35383	2.74241	0.637267		O
NM_139012	MAPK14	chr6:35995453-36079013	3.49439	3.50711	4.18518	4.09067	4.21946	4.15127	0.637172		O		O	O	O		O
NM_152765	C8orf46	chr8:67405490-67430759	0.0419143	0.0400023	0.645371	0.710815	1.45563	1.75014	0.637135							O	O
NM_203401	STMN1	chr1:26210676-26233368	0.31101	0.535407	0.879837	1.24038	0.187384	0.0934275	0.636897		O			O		O
NM_020960	GPR107	chr9:132815984-132902448	4.49179	4.47439	5.10172	5.13815	4.99115	5.06467	0.636844								O
NM_207015	NAALADL2	chr3:174577110-175523428	0.603351	0.605443	1.17013	1.31226	1.49132	1.60015	0.6368						O	O	O
NM_025057	C14orf45	chr14:74486058-74551196	0.773444	0.72995	1.33667	1.43967	1.33098	1.37998	0.636469
NR_015447	LOC153684	chr5:43042235-43045370	0.421348	0.478473	1.07922	1.09333	0.900567	0.81895	0.636367
NR_033675	VDAC2	chr10:76969911-76991207	1.88007	1.62094	2.34768	2.42534	1.92336	2.13592	0.636004		O	O				O	O
NM_018054	ARHGAP17	chr16:24930711-25026675	2.29105	2.21826	2.95224	2.82814	3.32815	3.51623	0.635537			O				O
NM_001135190	ARAP1	chr11:72396113-72463434	1.32823	1.64578	2.04918	2.19538	1.88587	1.59442	0.635277			O	O				O
NM_025188	TRIM45	chr1:117653676-117664411	0.869711	0.69712	1.47098	1.36605	1.39892	1.24138	0.635102					O
NR_026736	C6orf52	chr6:10671650-10695030	0.0758552	0.136052	0.734712	0.747263	0.695626	1.0687	0.635034			O			O		O
NM_024663	NPEPL1	chr20:57226308-57290900	2.35204	2.00209	3.02939	2.5947	2.11745	1.40614	0.634984		O			O		O
NM_001098525	CKAP2	chr13:53029494-53050763	3.15013	3.11253	3.90513	3.62708	2.74534	2.92907	0.634773			O		O
NM_001924	GADD45A	chr1:68150859-68154021	5.28555	5.14207	5.79439	5.90249	6.19671	5.90726	0.634635		O		O		O	O	O
NM_198315	VWA5A	chr11:123986110-124017618	0.0744579	0.122261	0.655032	0.810515	1.38455	1.44036	0.634414
NR_049782	SNX17	chr2:27593362-27603611	0.80749	0.422965	1.04873	1.45041	1.01701	1.54744	0.634341		O			O
NM_152558	IQCE	chr7:2598631-2654368	1.74998	1.53737	2.33574	2.22011	2.29937	2.33261	0.634247					O		O
NM_001921	DCTD	chr4:183811243-183838630	3.40471	3.5573	3.9762	4.25393	3.61175	3.811	0.634057		O	O	O	O		O
NM_032792	ZBTB45	chr19:59024896-59030921	1.7525	1.704	2.29112	2.43255	2.5319	2.22491	0.633583
NM_001242546	ANAPC16	chr10:73855789-73995618	3.38929	3.27143	3.92804	3.99977	3.85604	3.89005	0.63354				O			O
NM_022486	SUSD1	chr9:114758831-115112545	2.61737	2.62326	3.29756	3.20969	2.7487	2.80209	0.633306		O	O	O			O	O
NM_003899	ARHGEF7	chr13:111767623-111958081	3.36406	3.44801	4.02939	4.0492	3.94294	3.98671	0.633262		O		O	O		O
NM_001017992	ACTBL2	chr5:56775842-56778636	0.391893	0.394374	0.914577	1.13808	1.99417	2.02173	0.633195	O			O	O	O	O	O
NM_000112	SLC26A2	chr5:149340299-149366963	2.20959	2.23501	2.87786	2.83269	3.19199	3.19788	0.632976		O			O
NR_027023	LOC645676	chr1:155305051-155533735	1.67993	1.36374	2.22596	2.0836	1.86349	1.61987	0.632944
NM_001256673	STOML1	chr15:74275558-74286963	0.781373	0.884139	1.31651	1.61466	1.81656	1.81919	0.632831				O			O
NM_004273	CHST3	chr10:73724119-73773322	2.12085	2.06713	2.72066	2.73296	2.62532	2.65231	0.632818			O				O
NM_007176	C14orf1	chr14:76117232-76127538	5.53341	5.54164	6.14852	6.19213	6.16656	6.17702	0.632801
NM_003650	CST7	chr20:24929865-24940564	0.26723	0.0464765	0.776417	0.802413	0.870684	0.96824	0.632562				O			O
NM_007249	KLF12	chr13:74260148-74708066	1.09704	1.2316	1.83976	1.75326	1.72713	1.75915	0.632189		O	O	O	O		O	O
NR_038975	MIR181A2HG	chr9:127284702-127533576	0.723732	0.647142	1.47614	1.15864	1.57785	1.14399	0.631955			O			O		O
NM_020782	KLHDC5	chr12:27933186-27955973	2.19114	2.15534	2.83456	2.77561	2.61616	2.59988	0.631846
NM_021138	TRAF2	chr9:139780964-139821067	3.64053	3.6936	4.31034	4.28732	4.09653	3.98074	0.631769				O
NM_018998	FBXW5	chr9:139834884-139839206	4.24228	4.28452	4.85709	4.93208	4.72158	4.41332	0.631186		O	O		O			O
NM_000431	MVK	chr12:110011499-110035071	3.1613	3.14897	3.73786	3.83457	3.24133	3.46689	0.631077				O			O
NM_001005731	ITGB4	chr17:73717515-73753899	3.63825	3.6764	4.25727	4.31949	4.42511	4.37558	0.631052		O
NM_181845	ZNF283	chr19:44331472-44353050	1.49539	1.42566	2.09143	2.09114	2.18957	2.14463	0.630762			O		O		O
NM_020456	SPRYD7	chr13:50486841-50510625	2.43595	2.42597	3.04225	3.08107	3.20256	3.16047	0.630695					O			O
NR_049730	C17orf65	chr17:42248073-42264085	1.50217	1.93036	2.31898	2.37397	2.14972	2.18742	0.630212
NM_207352	CYP4V2	chr4:187112673-187134617	0.744834	0.770358	1.3388	1.43658	1.41966	1.50176	0.630093					O
NM_001145998	SLC15A2	chr3:121613170-121663034	0.571927	0.635085	1.19182	1.27501	1.0781	1.38082	0.629911			O					O
NM_001005915	ERBB3	chr12:56473808-56497291	1.87391	1.54655	2.21212	2.46792	2.51043	2.40194	0.629793		O			O		O
NM_005387	NUP98	chr11:3696239-3847601	1.99809	2.15578	2.7552	2.65798	2.52723	2.52066	0.629654
NM_004059	CCBL1	chr9:131595391-131644354	2.10429	1.91211	2.63355	2.64192	3.02726	2.90807	0.629538
NM_006336	ZER1	chr9:131486740-131534198	3.21083	3.26482	3.86377	3.87067	3.84331	3.86055	0.629397		O
NM_022138	SMOC2	chr6:168841830-169068674	0.00592132	0	0.583096	0.681487	0.793818	0.425174	0.629331				O
NM_015017	USP33	chr1:78161673-78225564	2.24075	2.30296	2.96711	2.83486	2.95706	2.87364	0.62913		O	O		O		O	O
NM_025251	ARHGAP39	chr8:145754562-145838888	1.83854	1.71961	2.4426	2.37363	2.76648	2.56393	0.62904							O
NM_001254755	CYB5D2	chr17:4046461-4060995	0.653293	0.588165	1.29246	1.20636	1.35006	1.10713	0.628681
NM_000375	UROS	chr10:127477146-127511837	3.29074	3.35612	3.87591	4.02811	4.50357	4.45859	0.628582					O
NM_145244	DDIT4L	chr4:101107026-101111655	0.599441	0.616383	1.22434	1.24842	1.15766	1.25532	0.628466				O				O
NM_001024380	TM2D2	chr8:38846326-38854041	0.541722	0.25096	1.15325	0.895647	0.959772	1.15965	0.628106
NM_017622	C17orf59	chr17:8091650-8093564	1.68212	1.86847	2.36625	2.44046	2.81669	2.8616	0.628061
NM_004408	DNM1	chr9:130928343-131017527	2.46324	2.48781	3.17927	3.02777	3.10314	3.2849	0.628002					O
NM_173207	TGIF1	chr18:3412071-3458406	0.923051	1.77194	1.8208	2.12986	1.98179	1.93175	0.627838		O			O	O	O
NM_001188	BAK1	chr6:33540322-33548070	3.82548	3.89496	4.46611	4.50954	4.84521	4.94003	0.627606			O	O			O
NM_030981	RAB1B	chr11:66036055-66044963	7.18977	7.16388	7.79347	7.8141	7.61728	7.62921	0.626961		O			O
NM_006281	STK3	chr8:99466858-99954799	4.34608	4.30201	4.91547	4.98645	4.99088	5.19943	0.626912			O				O	O
NM_014689	DOCK10	chr2:225629806-225907330	1.9184	2.03866	2.61743	2.59333	2.60191	2.59867	0.626842		O	O	O	O			O
NM_080750	DPH3P1	chr20:61448413-61493115	1.32371	1.32126	1.89721	2.00129	1.66816	2.06109	0.626763
NM_001008239	C18orf25	chr18:43753987-43846955	3.61632	3.69796	4.28567	4.28186	4.35996	4.38786	0.626622		O	O				O	O
NM_033022	RPS24	chr10:79793517-79816571	9.57184	9.5769	10.187	10.214	10.1007	10.2771	0.626155						O
NM_005746	NAMPT	chr7:105888731-105925638	7.02321	6.93777	7.61184	7.60136	7.01936	7.00602	0.626113			O	O		O		O
NM_001024594	C1orf53	chr1:197871681-197876497	1.30052	1.13401	1.89617	1.79056	2.1238	1.87119	0.626102					O
NM_001145138	RELA	chr11:65421066-65430443	1.02157	0.741786	1.35837	1.6564	1.18946	0.730966	0.625709
NM_001078173	FAM127C	chrX:134154533-134156566	0.7508	0.590978	1.30529	1.28738	2.15362	2.22673	0.625449					O
NM_017654	SAMD9	chr7:92728825-92747336	1.51949	1.80675	2.27956	2.29727	2.67551	2.7558	0.625294					O	O	O
NM_014292	CBX6	chr22:39260247-39268258	4.46041	4.47606	5.07543	5.11157	5.88426	5.80972	0.625266
NM_001146094	FAN1	chr15:31196054-31283807	1.28617	0.131212	1.44161	1.22574	0.424346	0.996564	0.62498		O		O	O		O
NM_001267818	OSTC	chr4:109571740-109588978	0.25154	0.354072	0.89432	0.960627	0.631208	0.795394	0.624668						O
NR_026862	PPP1R3E	chr14:23765111-23772057	0.604812	0.5449	1.2673	1.13121	0.841517	0.760149	0.624399
NR_002166	TRAPPC2P1	chr19:57874878-57890925	4.18437	4.0774	4.76501	4.74548	4.5196	4.72225	0.624365
NM_012091	ADAT1	chr16:75632246-75657221	2.28398	2.3567	2.92239	2.96689	2.75532	2.79766	0.624304		O					O	O
NM_181787	DPY19L4	chr8:95732102-95806076	3.45565	3.43621	4.08695	4.0531	3.71351	3.66759	0.624098		O	O		O			O
[truncated: 21,505 more rows]
